# Supplementary material for: Gas exchange velocities ( k 600 ), gas exchange rates ( K 600 ), and hydraulic geometries for streams and rivers derived from the NEON Reaeration field and lab collection data product (DP1.20190.001)
Source: Copernicus journal article supplement (doi:10.5194/essd-16-5563-2024), 2024-12-05
Supplement: Supplementary file 1 [file essd-16-5563-2024-supplement.pdf]

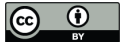

*Supplement of*

**Gas exchange velocities ( $k_{600}$ ), gas exchange rates ( $K_{600}$ ), and hydraulic geometries for streams and rivers derived from the NEON Reaeration field and lab collection data product (DP1.20190.001)**

**Kelly S. Aho et al.**

*Correspondence to:* Kelly S. Aho ([kellyaho@msu.edu](mailto:kellyaho@msu.edu))

The copyright of individual parts of the supplement might differ from the article licence.

**Table S1. Priors used in Bayesian multilevel models. Priors are given as a distribution ( $\mu, \sigma$ ).**

| Site | $K_{600}$ |          |           |           |            |           | $K_{600}$ |           |           |            |  |  |
|------|-----------|----------|-----------|-----------|------------|-----------|-----------|-----------|-----------|------------|--|--|
|      | intercept | sigma    | a         | b         | sigma_expt | intercept | sigma     | a         | b         | sigma_expt |  |  |
| BIGC | (0,0.2)   | (0, 0.1) | (-3.4,10) | (0.5,1)   | (0,2)      | (0,0.2)   | (0, 0.1)  | (0.6,10)  | (0.3,1)   | (0,2)      |  |  |
| BLDE | (0,0.2)   | (0, 0.1) | (-0.9,10) | (0.4,1)   | (0,2)      | (0,0.2)   | (0, 0.1)  | (4.2,10)  | (0.1,1)   | (0,2)      |  |  |
| CARI | (0,0.2)   | (0, 0.1) | (-0.4,10) | (0.3,1)   | (0,2)      | (0,0.2)   | (0, 0.1)  | (5.9,10)  | (-0.2,1)  | (0,2)      |  |  |
| COMO | (0,0.2)   | (0, 0.1) | (0.7,10)  | (0.4,1)   | (0,2)      | (0,0.2)   | (0, 0.1)  | (6.1,10)  | (-0.1,1)  | (0,2)      |  |  |
| CUPE | (0,0.2)   | (0, 0.1) | (0.9,10)  | (0.2,1)   | (0,2)      | (0,0.2)   | (0, 0.1)  | (8.3,10)  | (-0.3,1)  | (0,2)      |  |  |
| GUJL | (0,0.2)   | (0, 0.1) | (-1.7,10) | (0.4,1)   | (0,2)      | (0,0.2)   | (0, 0.1)  | (3.2,10)  | (0,1)     | (0,2)      |  |  |
| HOPB | (0,0.2)   | (0, 0.1) | (-1.3,10) | (0.4,1)   | (0,2)      | (0,0.2)   | (0, 0.1)  | (3.5,10)  | (0.1,1)   | (0,2)      |  |  |
| KING | (0,0.2)   | (0, 0.1) | (-6.4,10) | (0.5,0.3) | (0,2)      | (0,0.2)   | (0, 0.1)  | (-2.9,4)  | (0.4,0.4) | (0,2)      |  |  |
| LECO | (0,0.2)   | (0, 0.1) | (-0.5,10) | (0.4,1)   | (0,2)      | (0,0.2)   | (0, 0.1)  | (5.1,10)  | (0,1)     | (0,2)      |  |  |
| LEWI | (0,0.2)   | (0, 0.1) | (-2.1,10) | (0.4,1)   | (0,2)      | (0,0.2)   | (0, 0.1)  | (2.8,10)  | (0.1,1)   | (0,2)      |  |  |
| MART | (0,0.2)   | (0, 0.1) | (-1.3,10) | (0.4,1)   | (0,2)      | (0,0.2)   | (0, 0.1)  | (3.2,10)  | (0.2,1)   | (0,2)      |  |  |
| MAYF | (0,0.2)   | (0, 0.1) | (-3.3,10) | (0.4,1)   | (0,2)      | (0,0.2)   | (0, 0.1)  | (0.7,10)  | (0.1,1)   | (0,2)      |  |  |
| MCDI | (0,0.2)   | (0, 0.1) | (-4.4,10) | (0.7,1)   | (0,2)      | (0,0.2)   | (0, 0.1)  | (-2.1,10) | (0.6,1)   | (0,2)      |  |  |
| MCRA | (0,0.2)   | (0, 0.1) | (-0.3,10) | (0.4,1)   | (0,2)      | (0,0.2)   | (0, 0.1)  | (5.2,10)  | (0.1,1)   | (0,2)      |  |  |
| OKSR | (0,0.2)   | (0, 0.1) | (-3.1,10) | (0.5,1)   | (0,2)      | (0,0.2)   | (0, 0.1)  | (0.5,10)  | (0.3,1)   | (0,2)      |  |  |
| POSE | (0,0.2)   | (0, 0.1) | (-0.6,10) | (0.4,1)   | (0,2)      | (0,0.2)   | (0, 0.1)  | (5.6,10)  | (0,1)     | (0,2)      |  |  |
| PRIN | (0,0.2)   | (0, 0.1) | (-2.8,1)  | (0.4,0.3) | (0,2)      | (0,0.2)   | (0, 0.1)  | (2.2,1)   | (0,0.5)   | (0,2)      |  |  |
| REDB | (0,0.2)   | (0, 0.1) | (-0.4,10) | (0.4,1)   | (0,2)      | (0,0.2)   | (0, 0.1)  | (4.6,10)  | (0.1,1)   | (0,2)      |  |  |
| SYCA | (0,0.2)   | (0, 0.1) | (-0.6,10) | (0.3,1)   | (0,2)      | (0,0.2)   | (0, 0.1)  | (5.0,10)  | (0.0,1)   | (0,2)      |  |  |
| TECR | (0,0.2)   | (0, 0.1) | (-0.5,10) | (0.5,1)   | (0,2)      | (0,0.2)   | (0, 0.1)  | (3.6,10)  | (0.2,1)   | (0,2)      |  |  |
| WALK | (0,0.2)   | (0, 0.1) | (-1.2,10) | (0.5,1)   | (0,2)      | (0,0.2)   | (0, 0.1)  | (3.9,10)  | (0.2,1)   | (0,2)      |  |  |
| WLOU | (0,0.2)   | (0, 0.1) | (-0.3,10) | (0.4,1)   | (0,2)      | (0,0.2)   | (0, 0.1)  | (4.4,10)  | (0.1,1)   | (0,2)      |  |  |

**Table S2. Issue log summarizing issues precluding estimates of gas exchange.**

| Issue                                                                                       | (n) |
|---------------------------------------------------------------------------------------------|-----|
| Travel time could not be calculated from conductivity timeseries                            | 141 |
| Outlier experiment                                                                          | 61  |
| SF <sub>6</sub> at Station 1 was lower than at any of Stations 2-4                          | 56  |
| Missing discharge measurement                                                               | 42  |
| Missing concentration data (SF <sub>6</sub> , or NaCL or NaBr, when salt-correction needed) | 25  |
| SF <sub>6</sub> was not detected at $\geq 1$ station                                        | 10  |
| Missing water temperature                                                                   | 2   |
| Other (duplicate stations, no decline in SF <sub>6</sub> )                                  | 2   |
| Missing width measurement                                                                   | 1   |

**Table S3. Mean, standard deviation (s.d.), minimum, maximum, and range of stream discharges with a gas exchange by site.**

| Site | Mean Q (lps) | s.d. Q (lps) | Min Q (lps) | Max Q (lps) | Range Q (lps) |
|------|--------------|--------------|-------------|-------------|---------------|
| BIGC | 70.8         | 49.9         | 16.2        | 195.7       | 179.5         |
| BLDE | 287.4        | 375.3        | 60.9        | 1247.2      | 1186.3        |
| CARI | 443.2        | 292.6        | 181.7       | 1030.0      | 848.3         |
| COMO | 49.4         | 75.1         | 1.1         | 251.9       | 250.9         |
| CUPE | 66.0         | 64.1         | 17.5        | 313.0       | 295.5         |
| GUIL | 159.5        | 102.2        | 63.1        | 371.5       | 308.4         |
| HOPB | 165.7        | 250.7        | 4.7         | 869.9       | 865.3         |
| KING | 101.5        | 60.5         | 11.2        | 140.1       | 128.9         |
| LECO | 229.2        | 109.7        | 93.1        | 426.1       | 333.0         |
| LEWI | 41.6         | 37.7         | 15.4        | 159.5       | 144.1         |
| MART | 140.2        | 201.5        | 19.5        | 503.1       | 483.6         |
| MAYF | 172.7        | 80.4         | 86.1        | 329.4       | 243.3         |
| MCDI | 79.5         | 60.5         | 24.8        | 162.3       | 137.5         |
| MCRA | 179.2        | 206.3        | 8.4         | 751.5       | 743.1         |
| OKSR | 942.5        | 822.8        | 151.7       | 2512.7      | 2361.0        |
| POSE | 16.5         | 20.7         | 1.1         | 99.3        | 98.2          |
| PRIN | 107.2        | 46.0         | 61.0        | 170.6       | 109.6         |
| REDB | 105.8        | 127.1        | 12.2        | 525.3       | 513.1         |
| SYCA | 93.6         | 110.7        | 13.0        | 357.3       | 344.3         |
| TECR | 66.8         | 90.3         | 4.8         | 269.6       | 264.8         |
| WALK | 6.4          | 4.7          | 3.6         | 18.8        | 15.2          |
| WLOU | 90.5         | 119.4        | 11.5        | 525.4       | 513.9         |

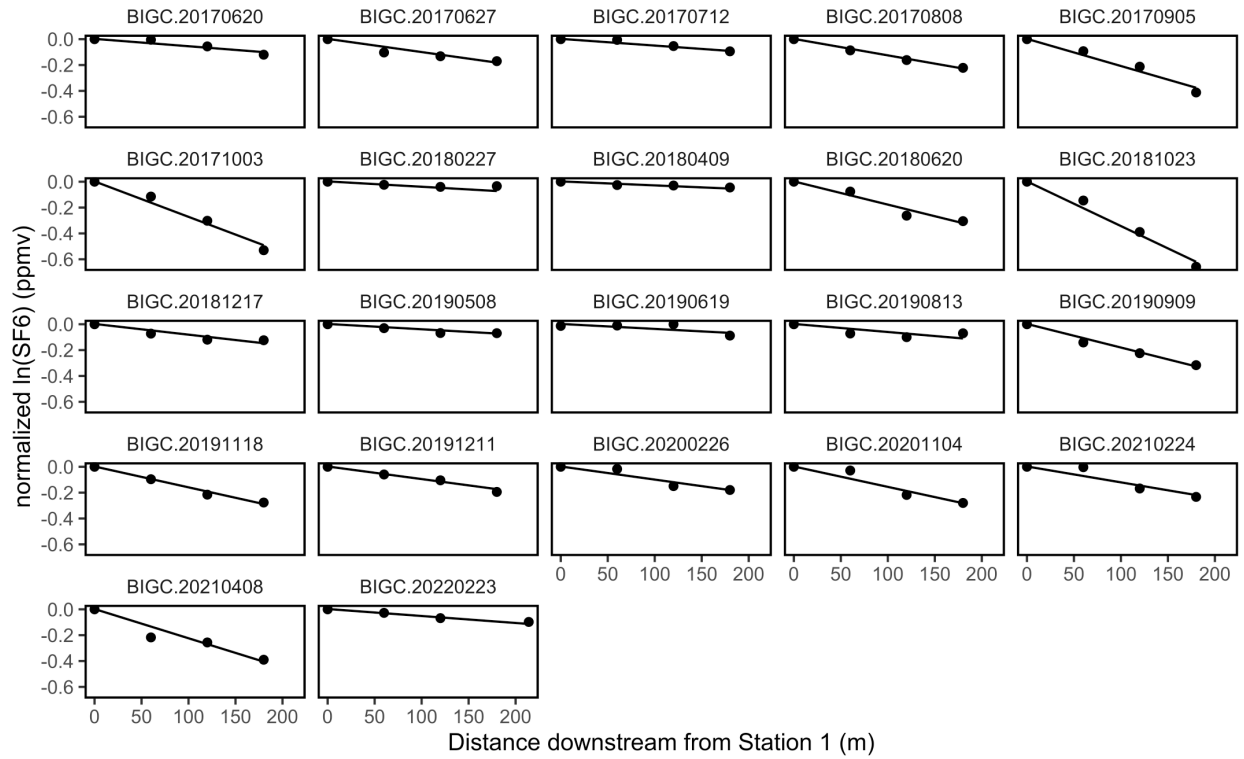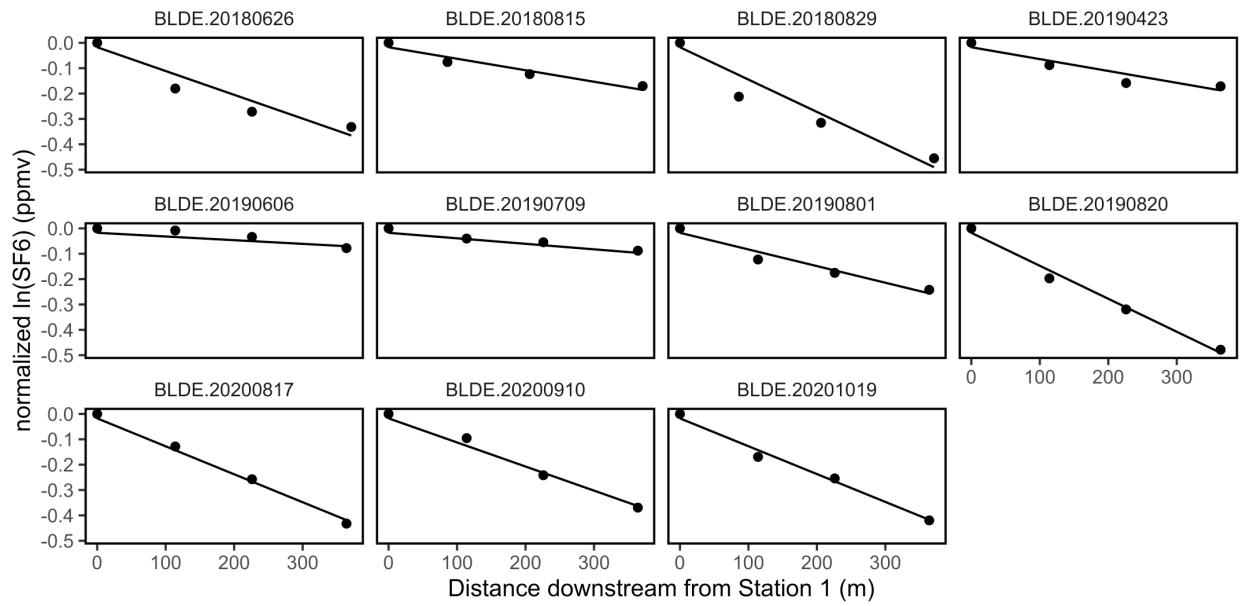

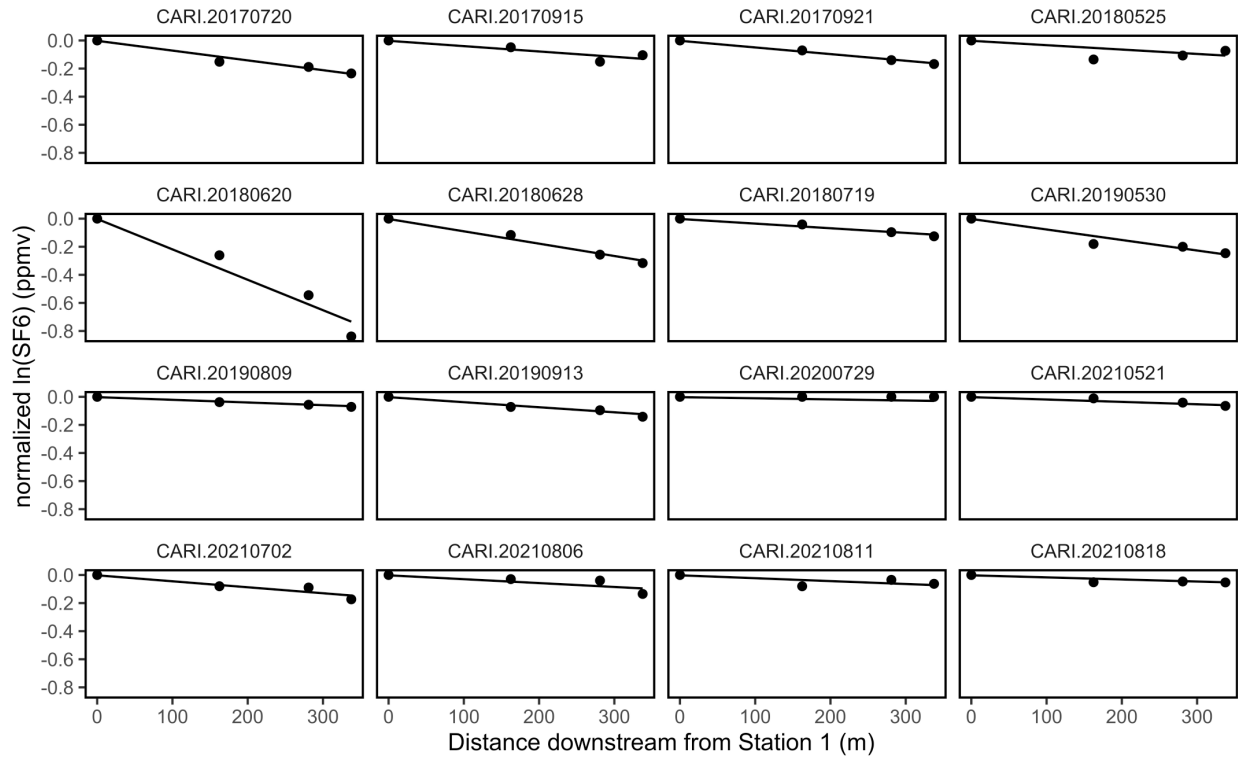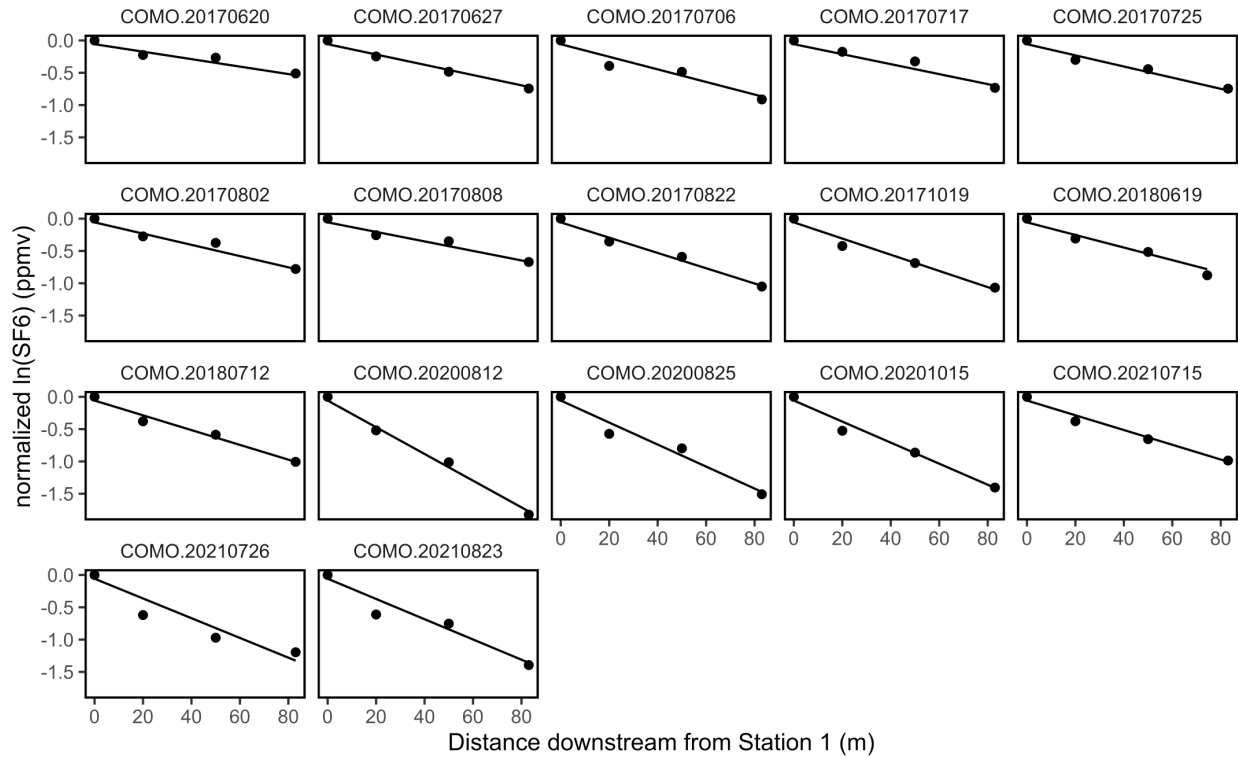

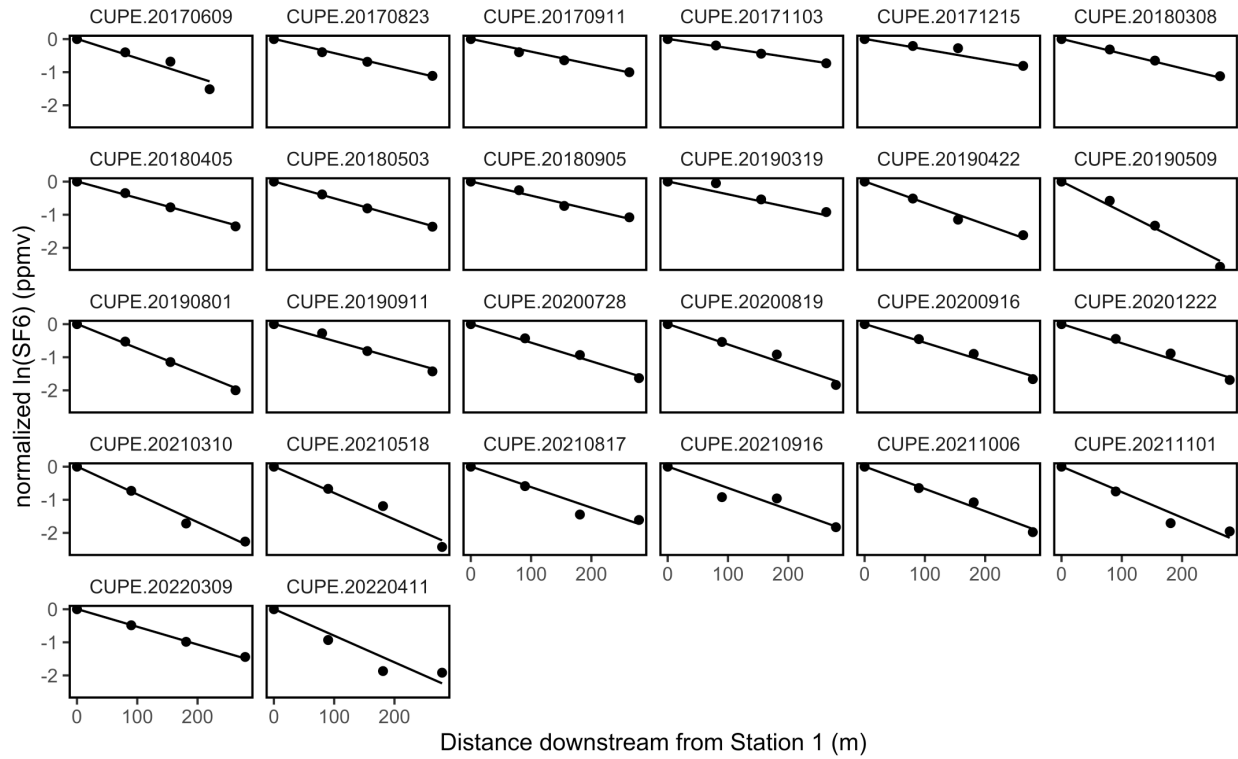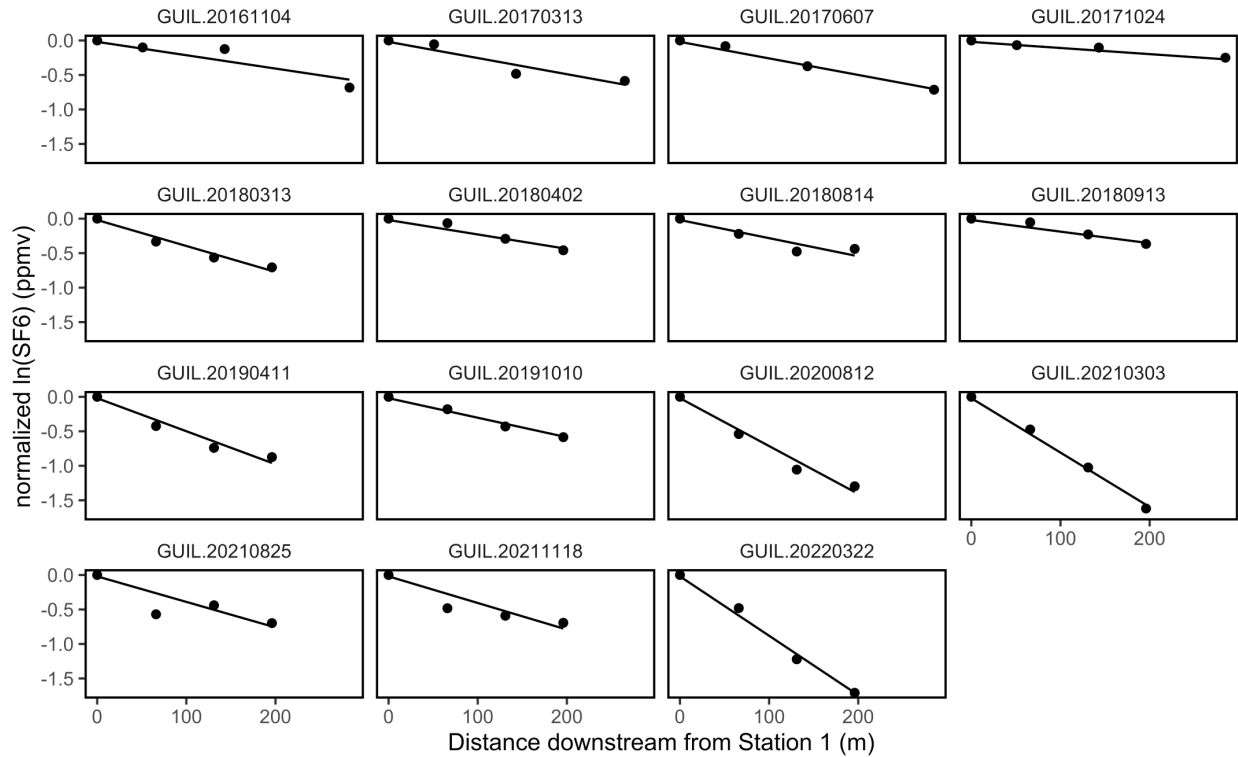

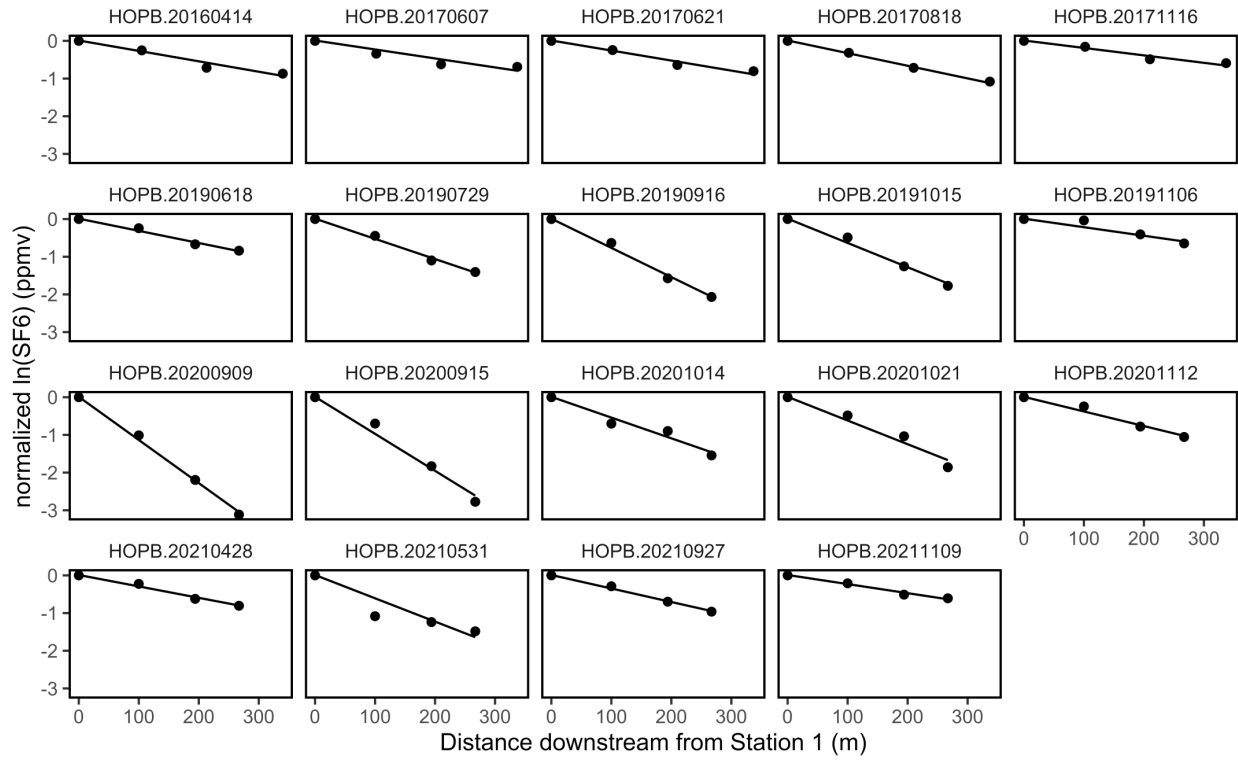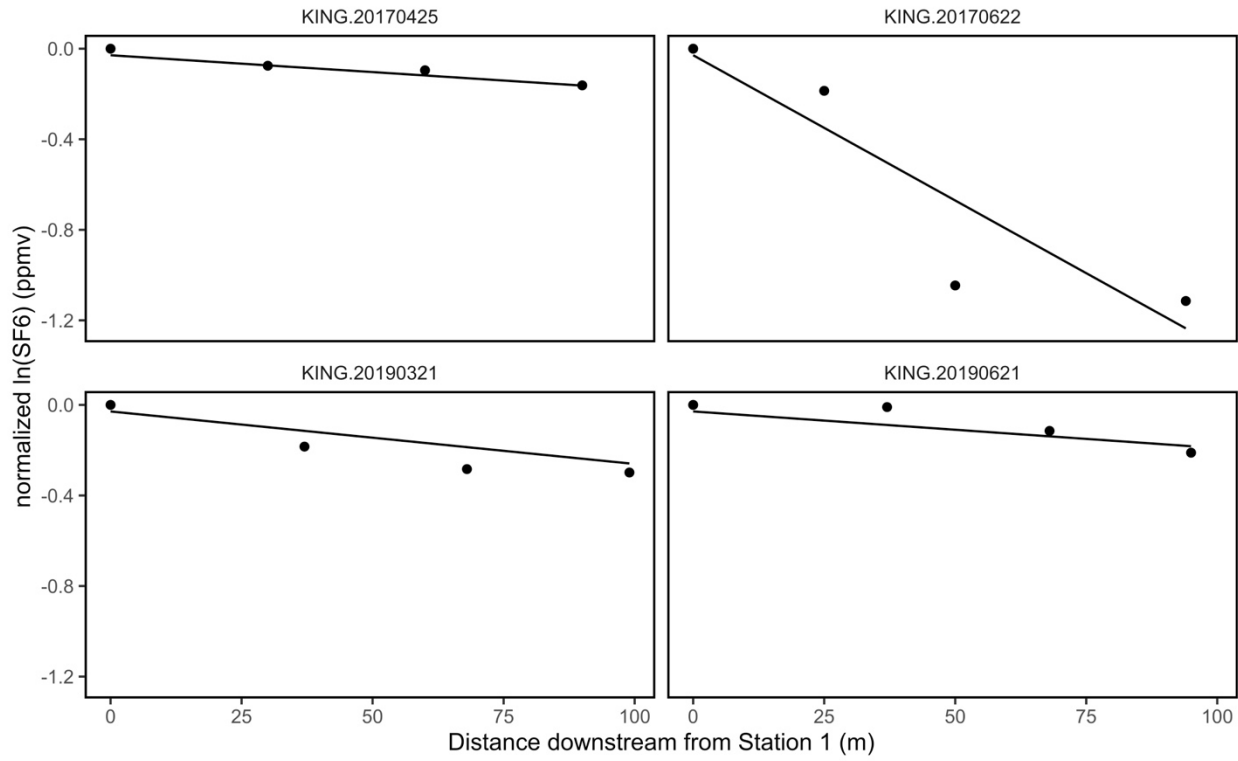

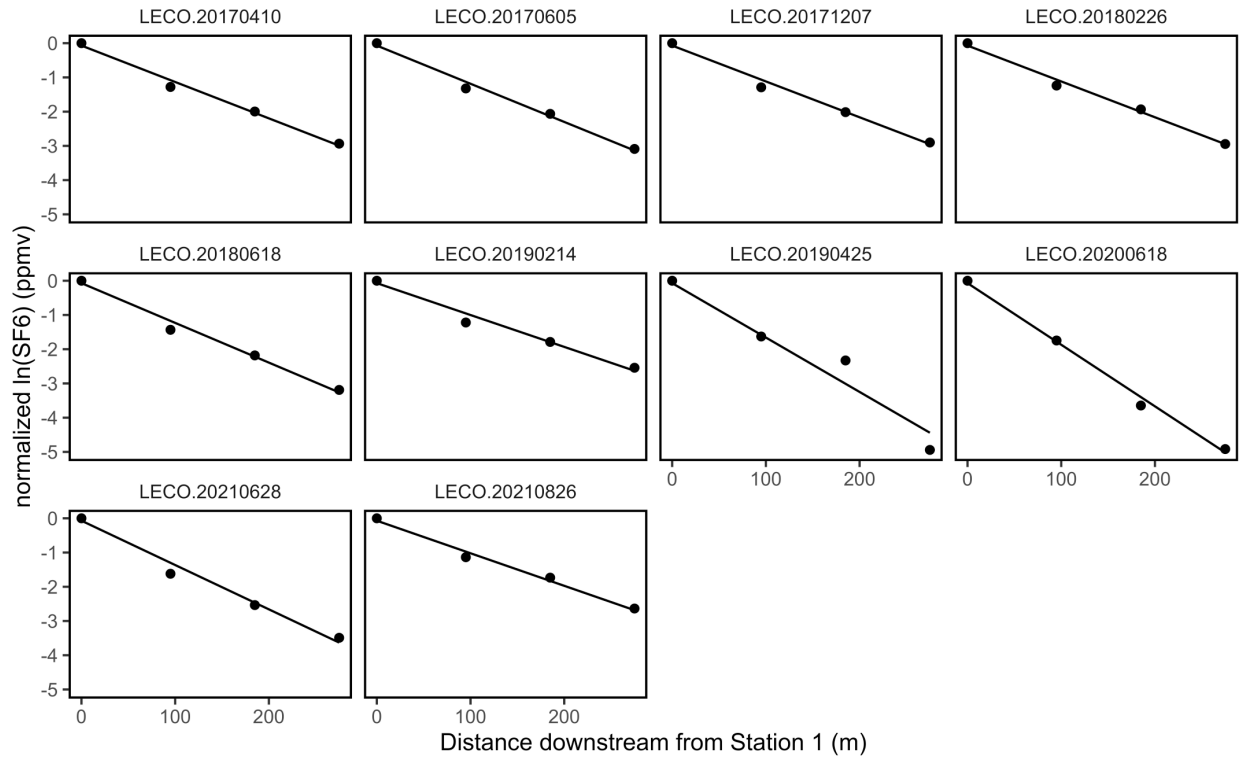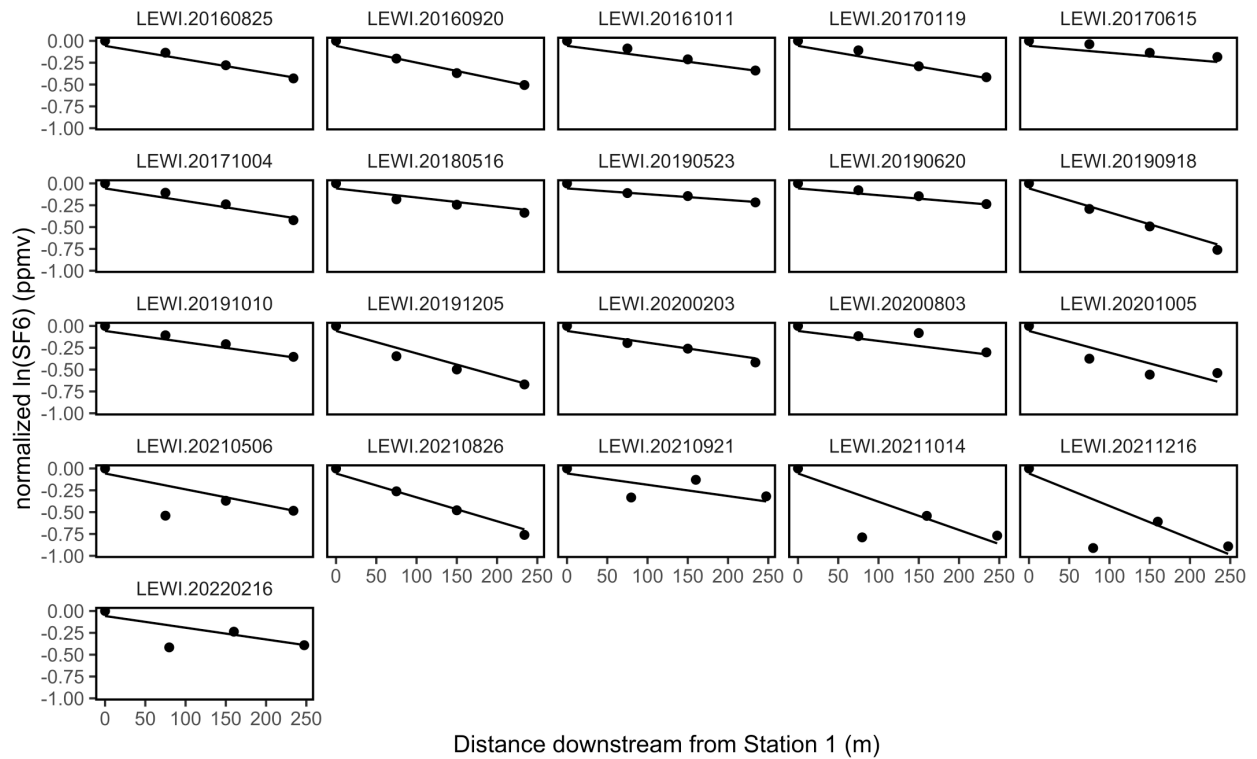



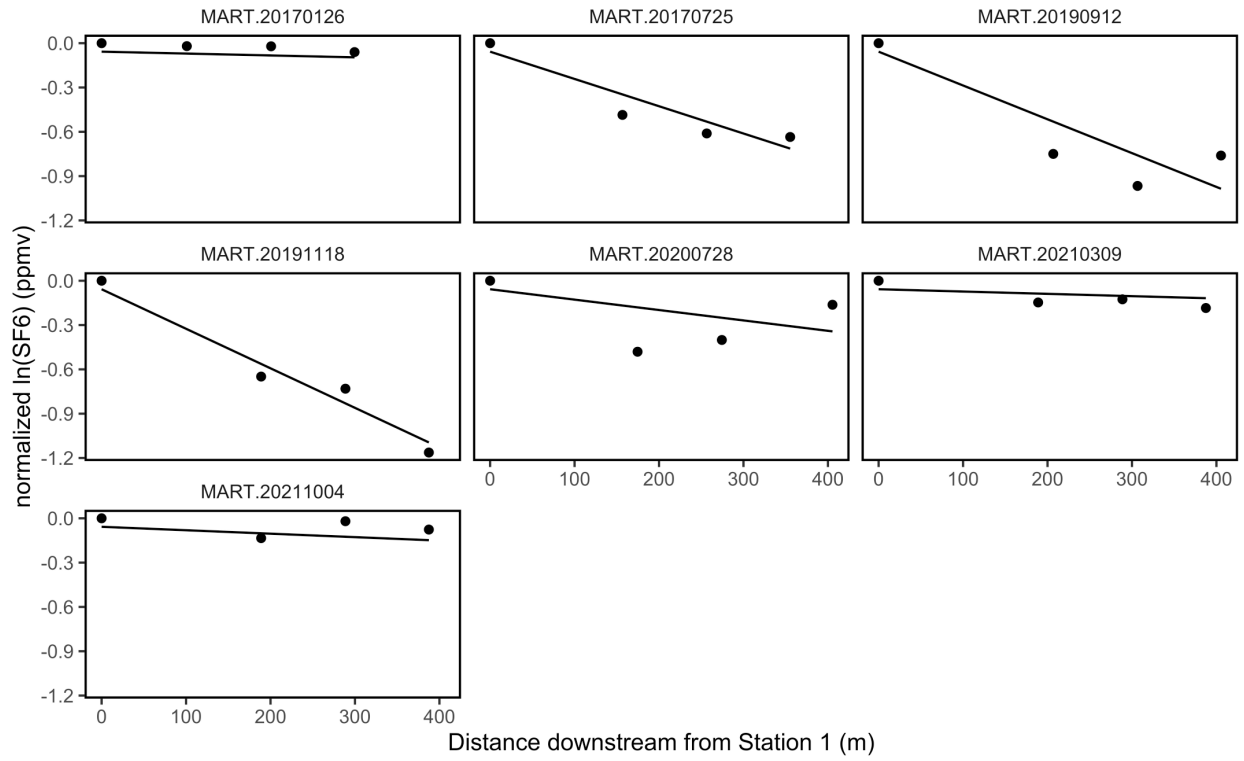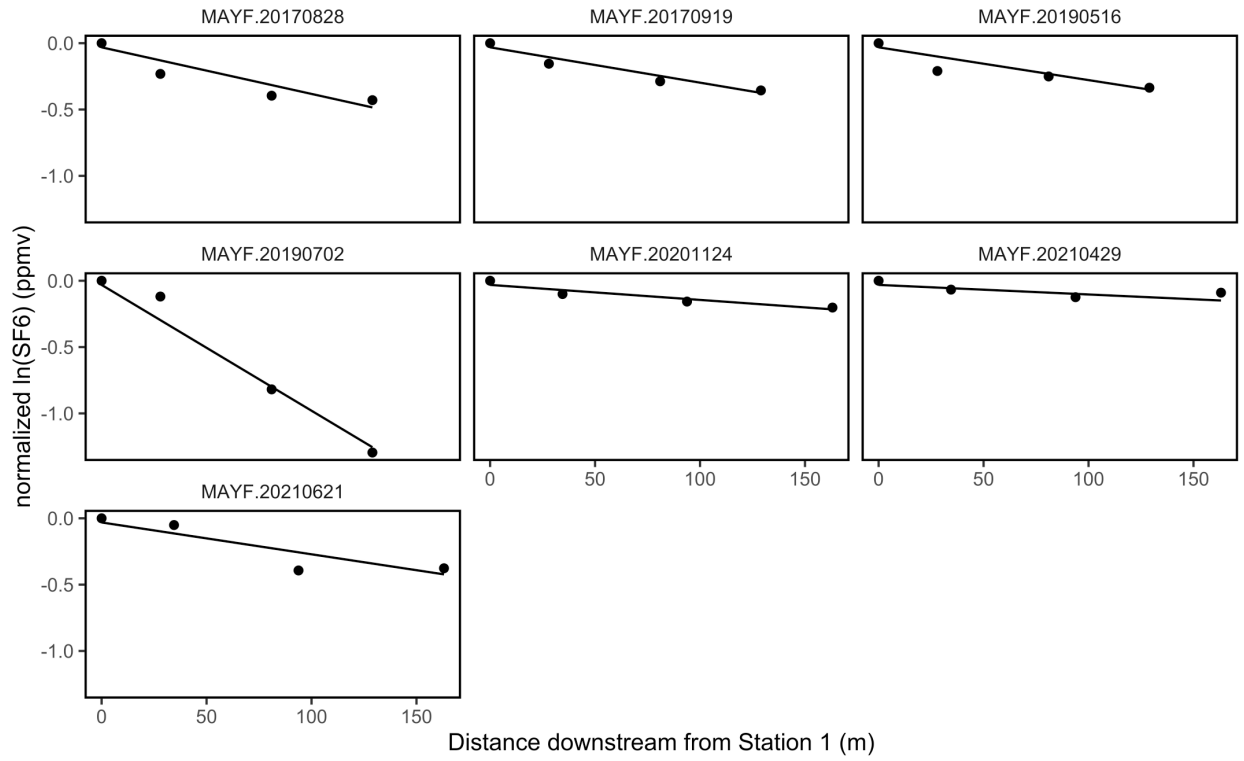

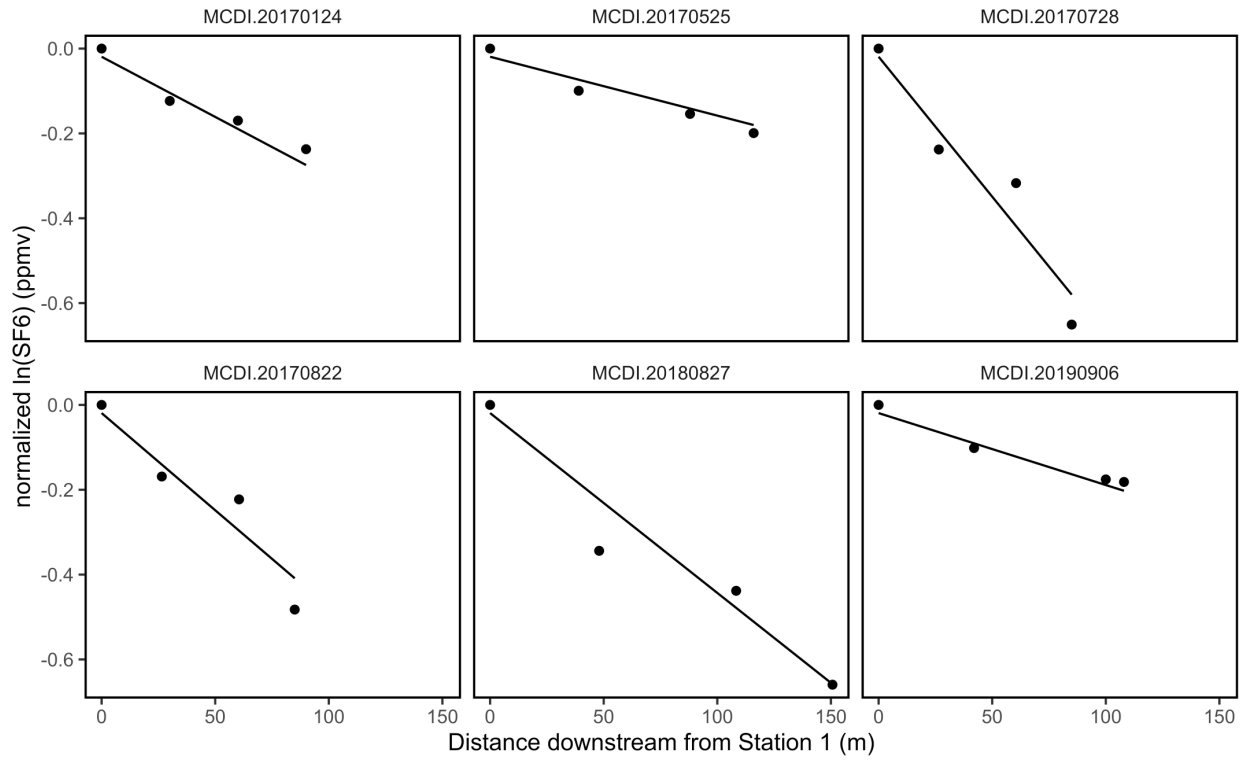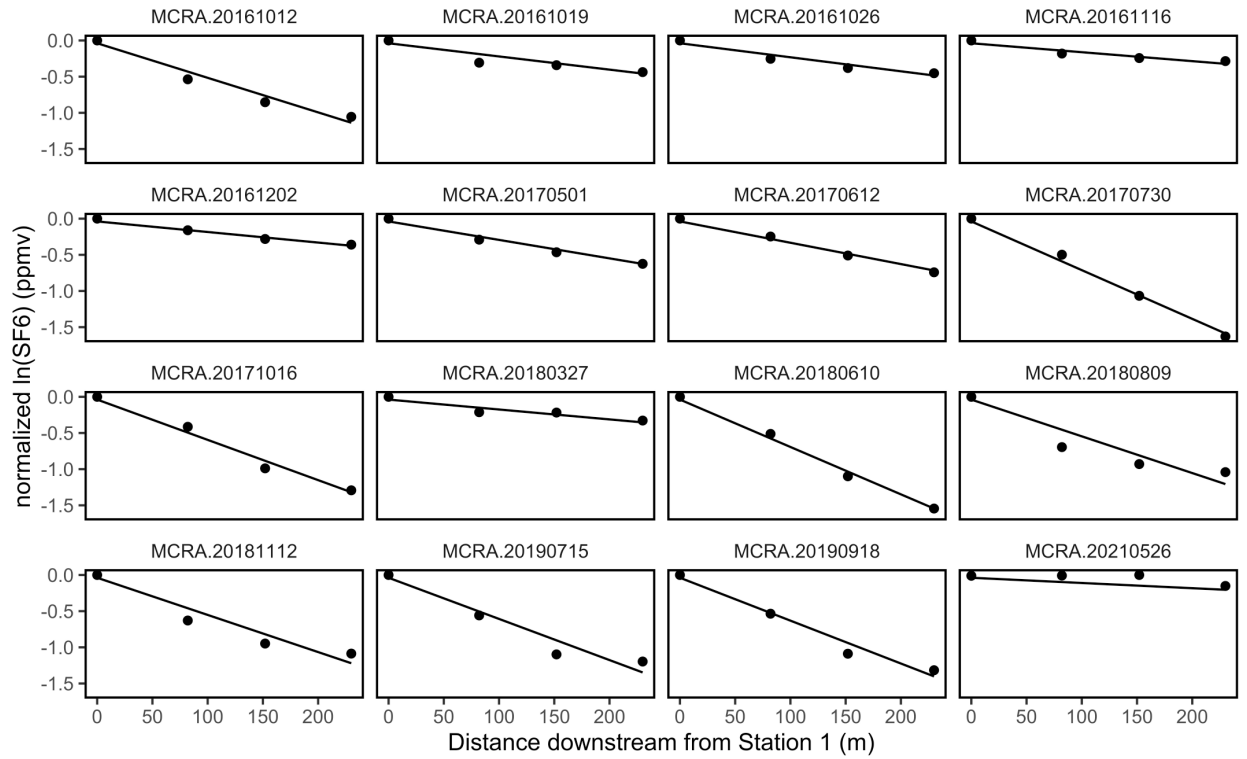

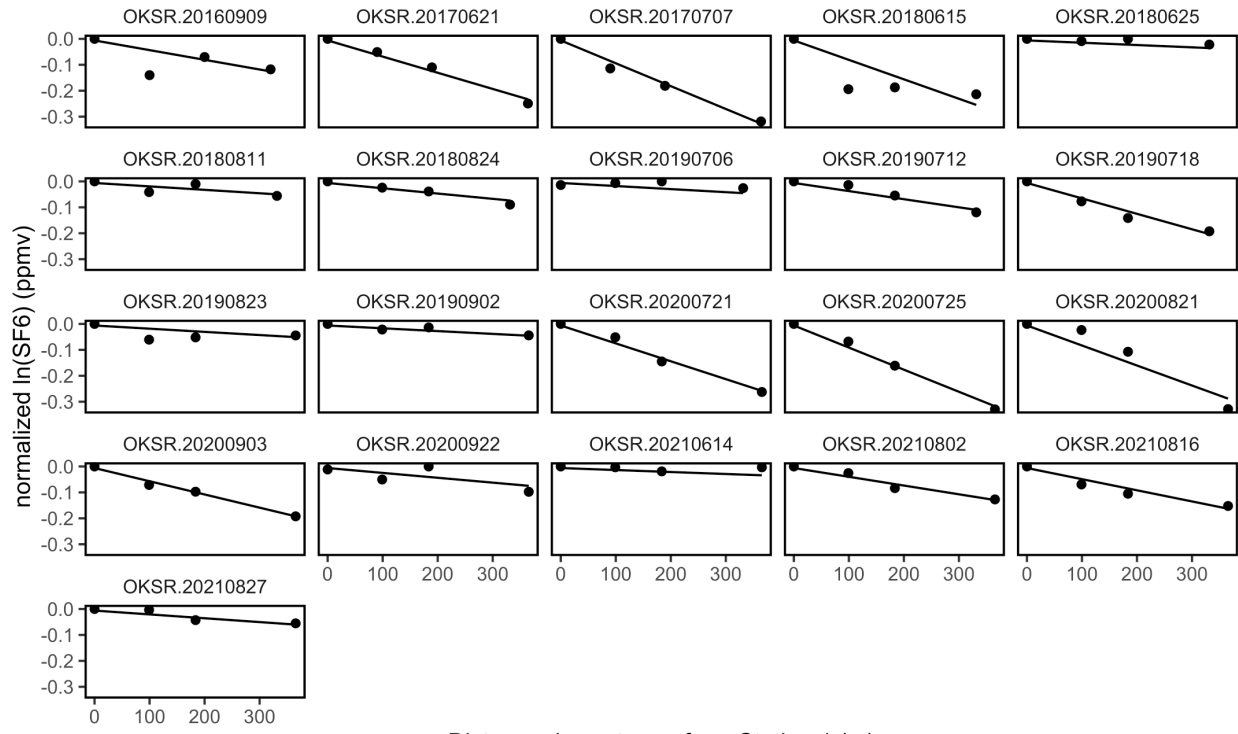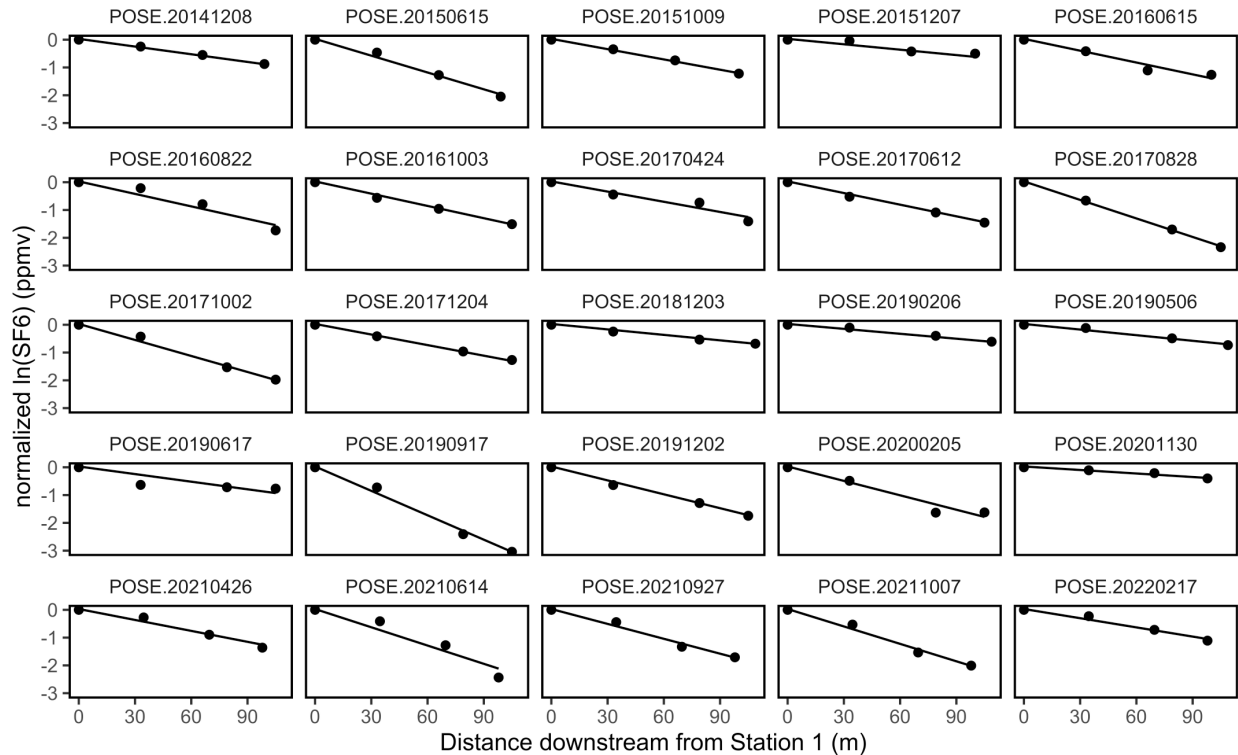

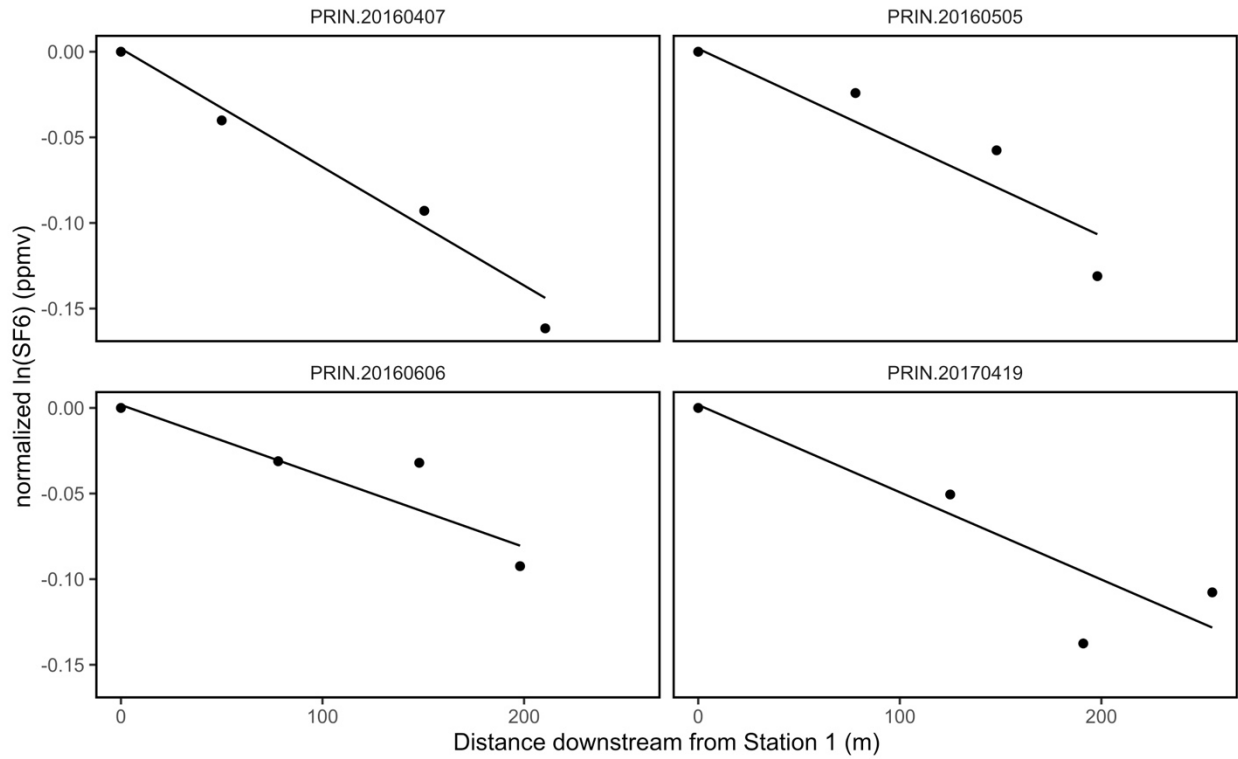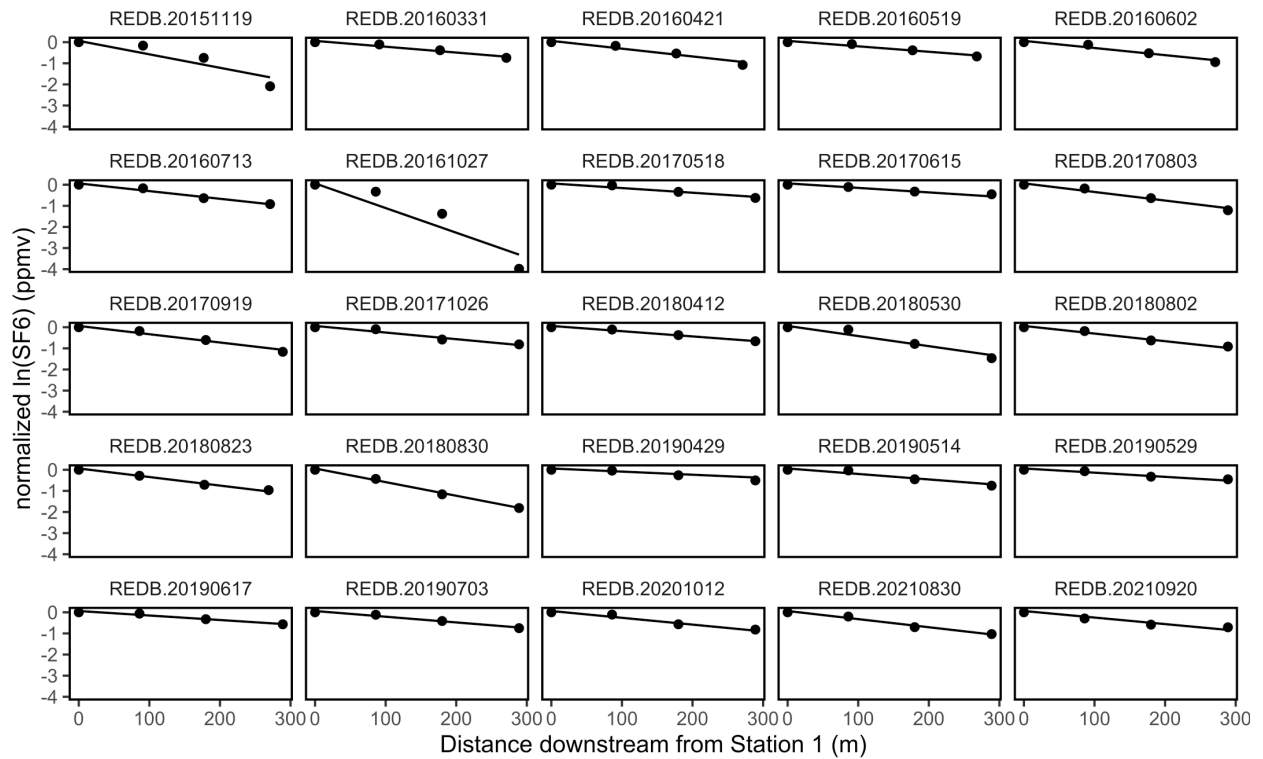

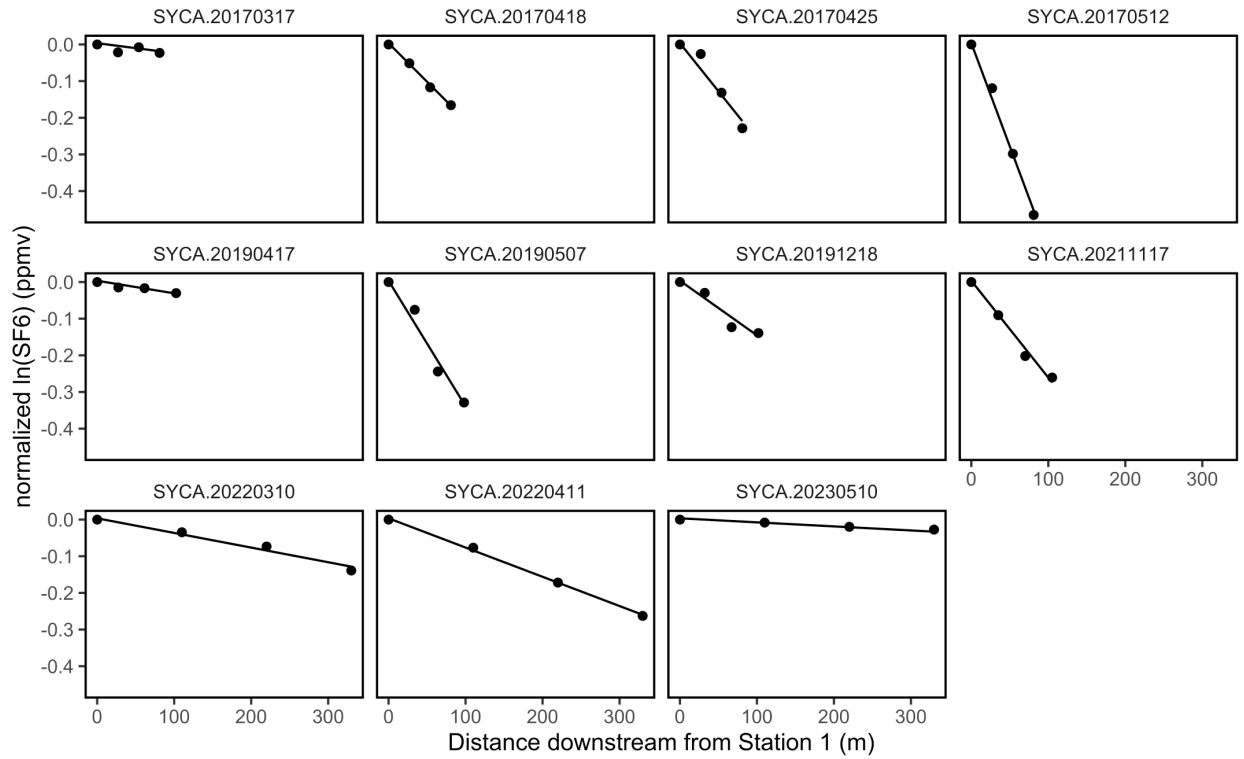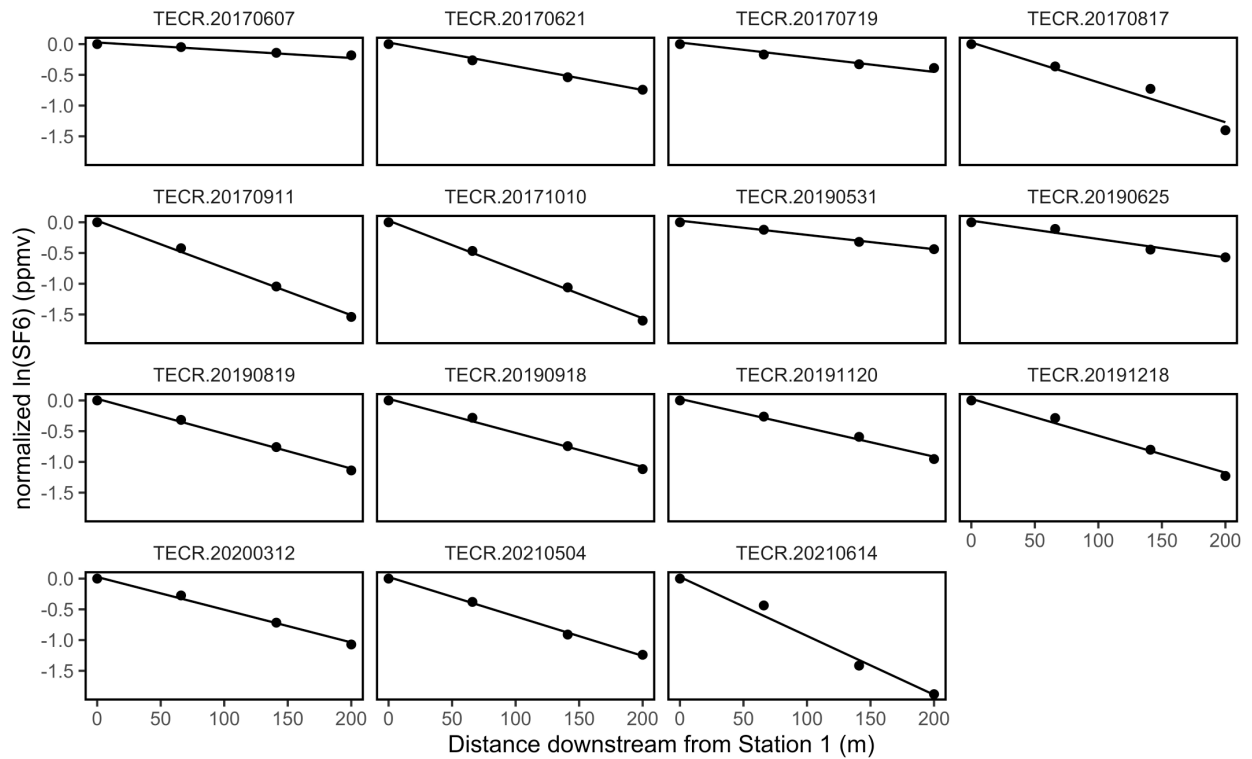

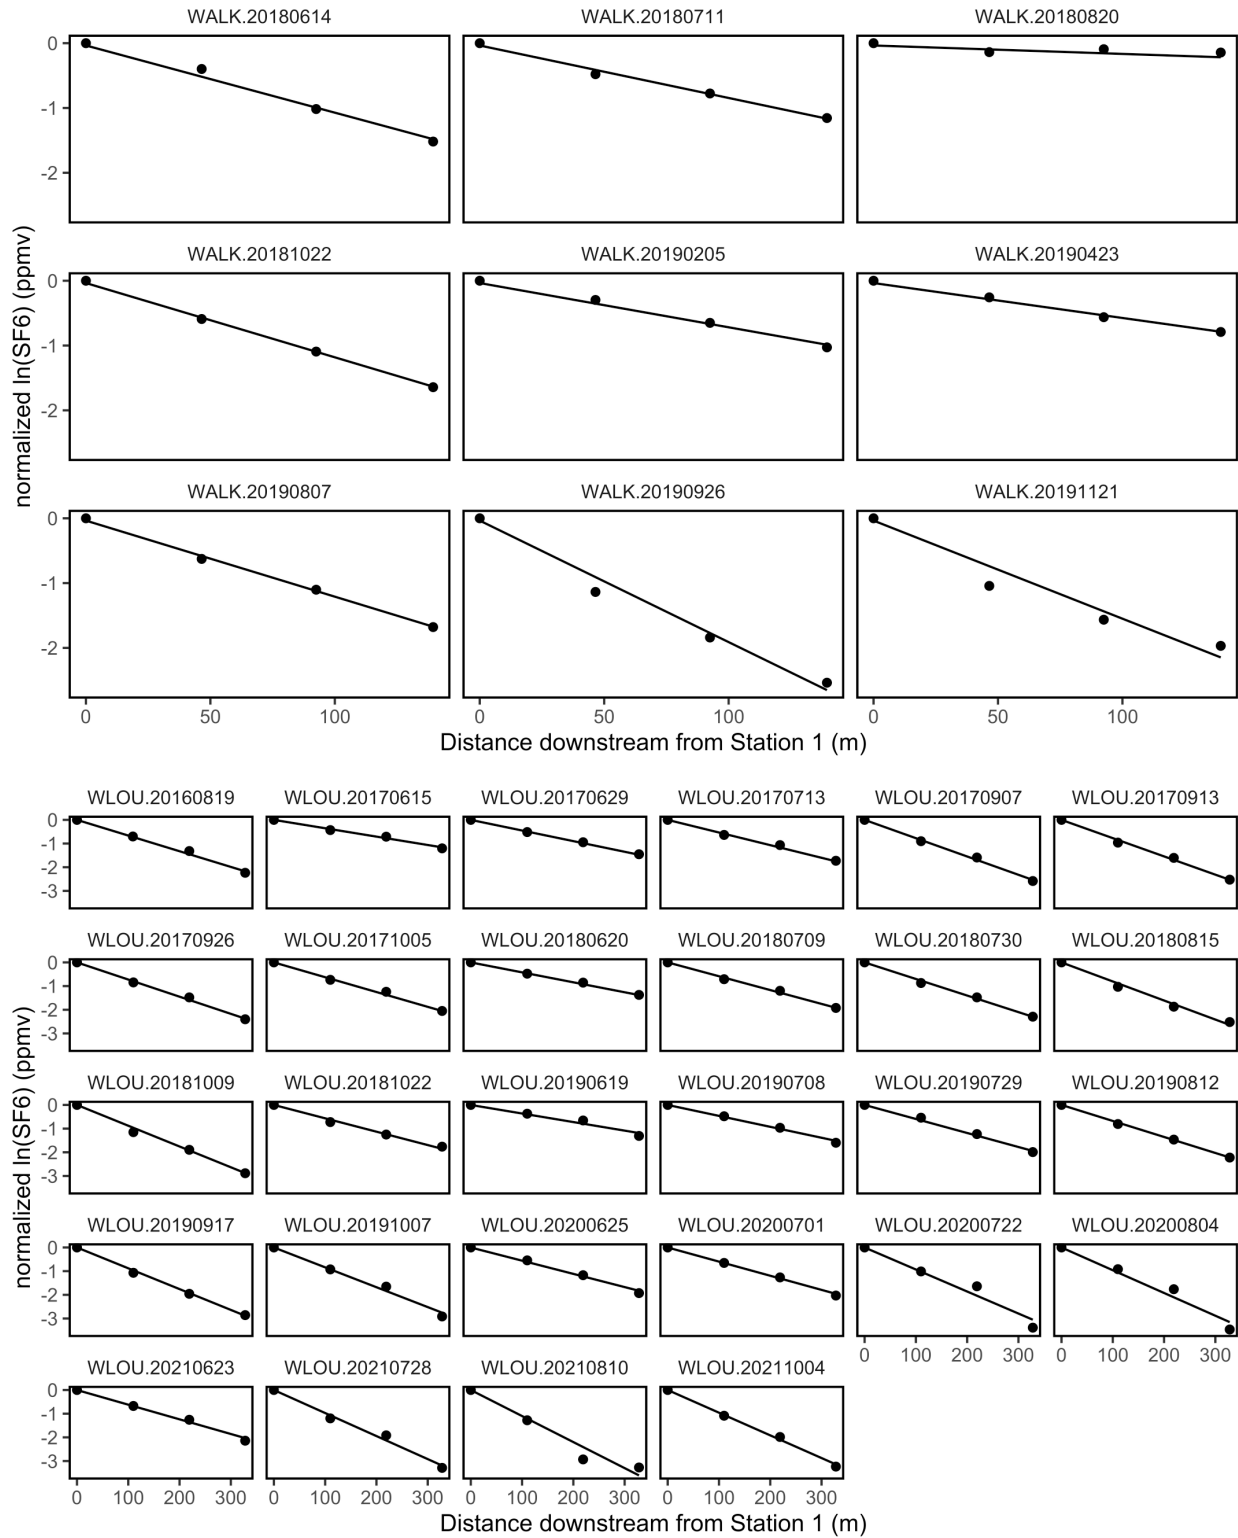

Figure S1. Model fits for Bayesian  $k_{600}$  models.

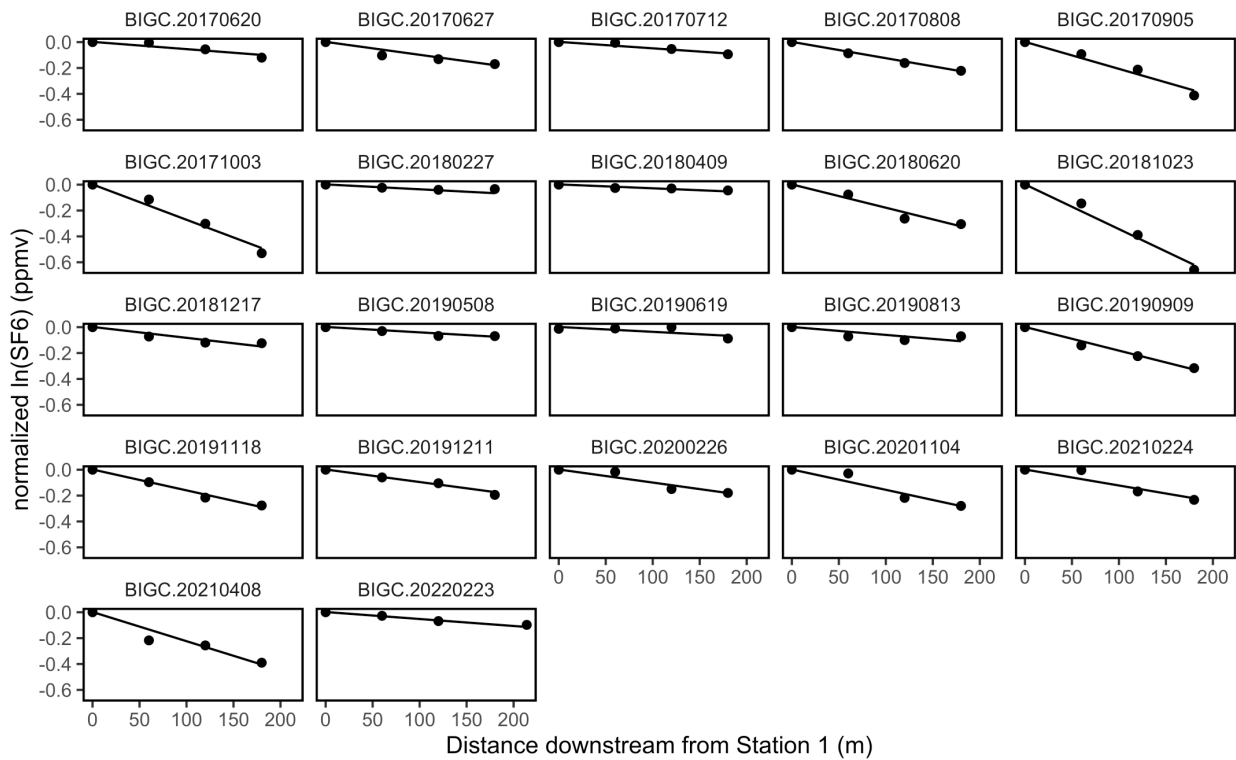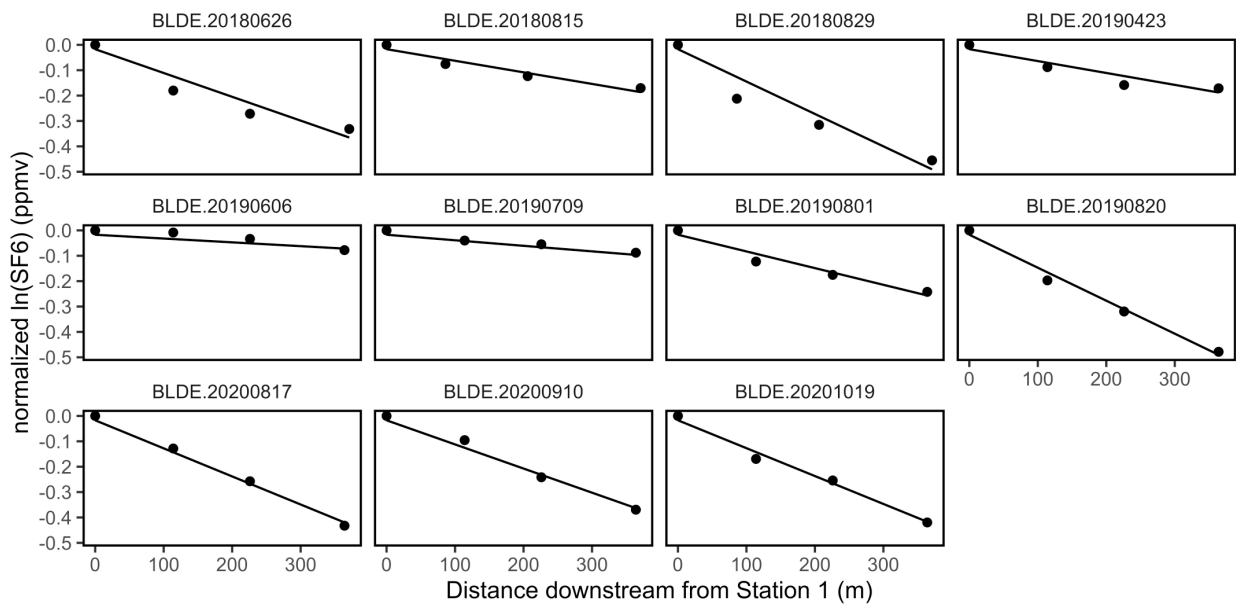

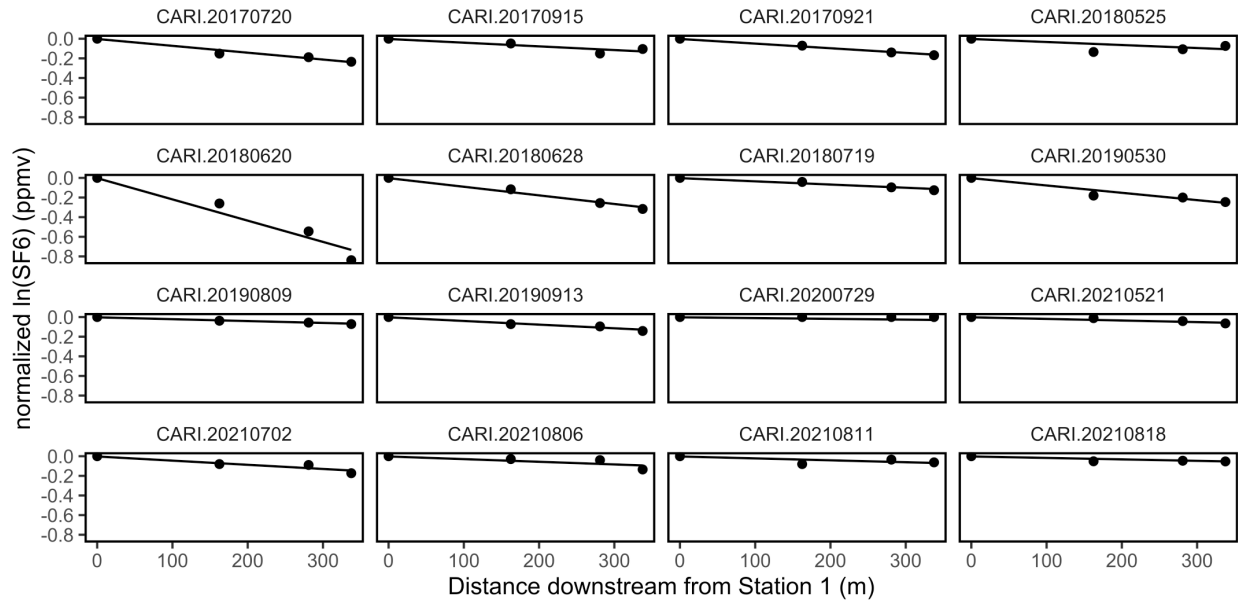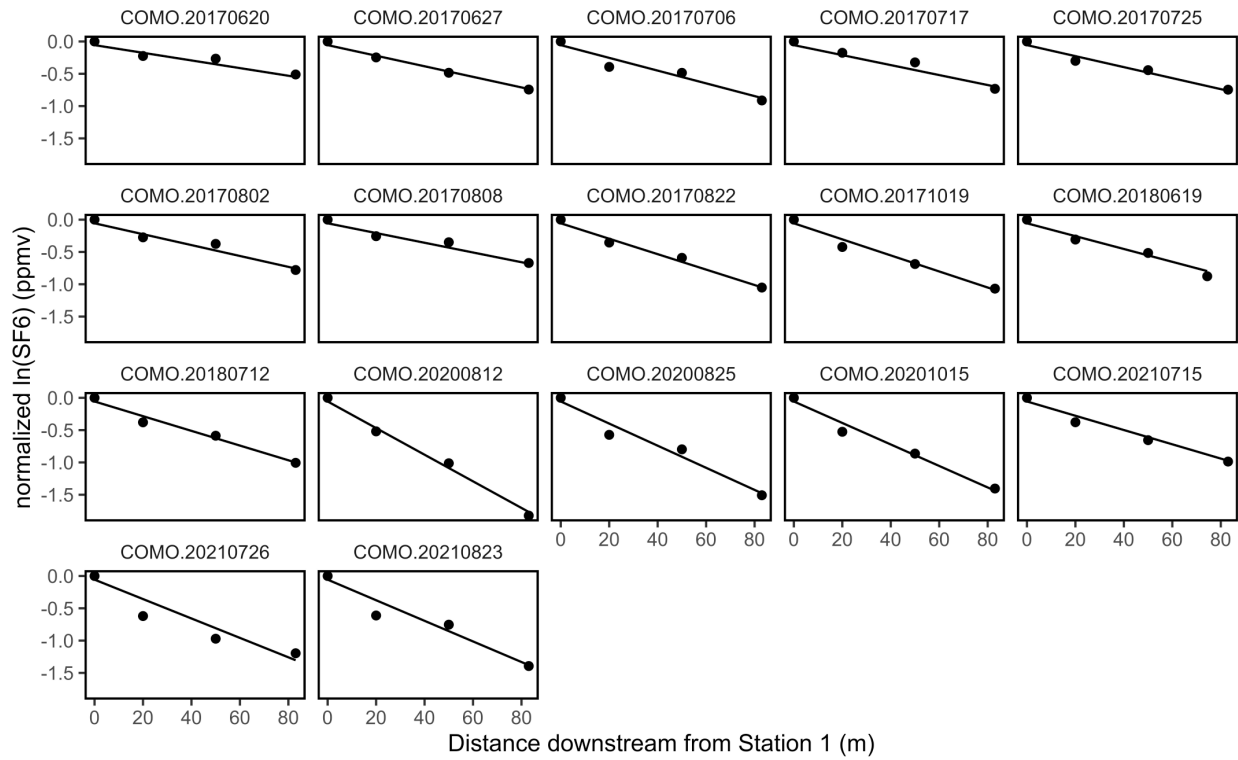



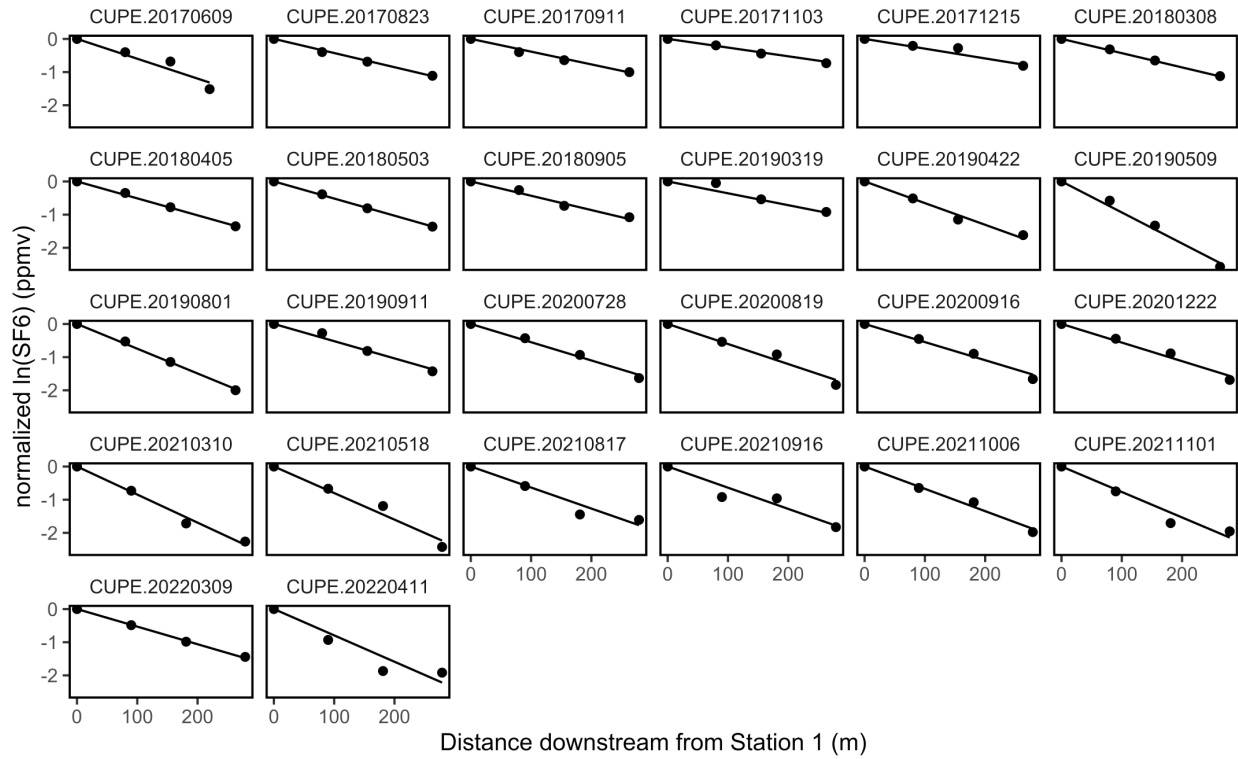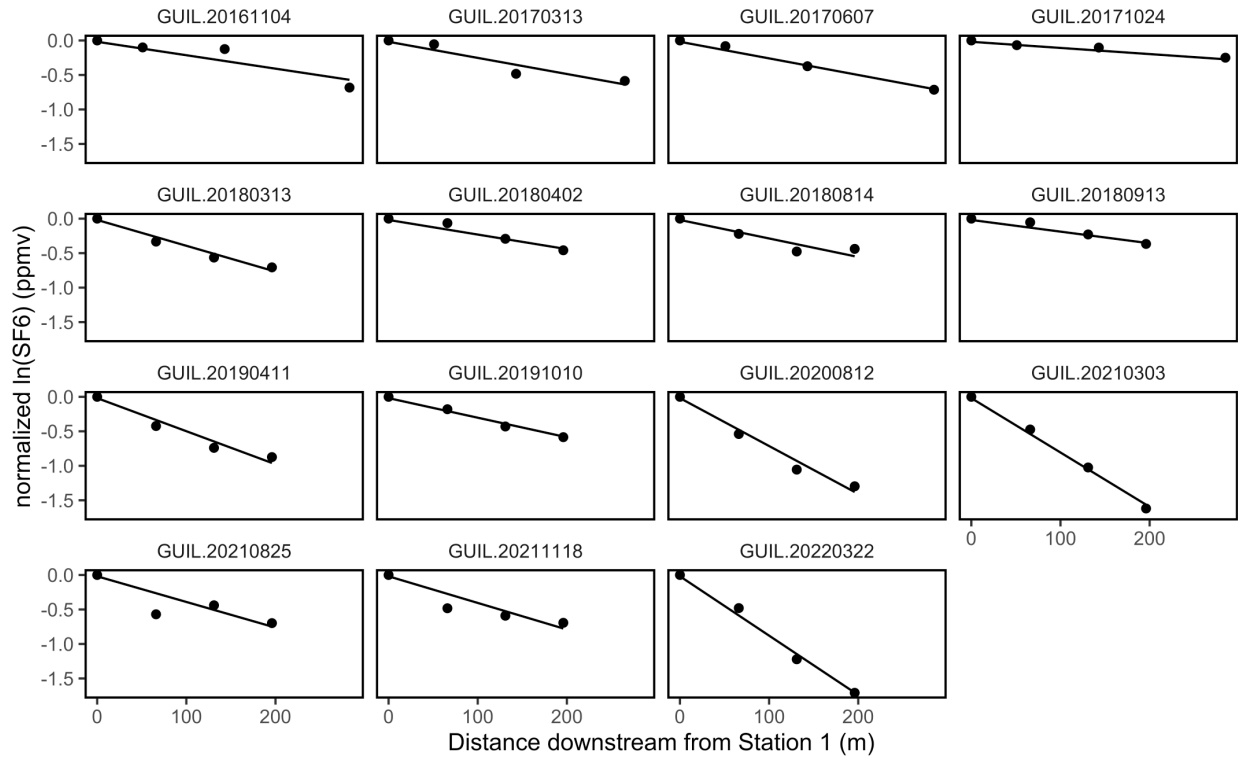

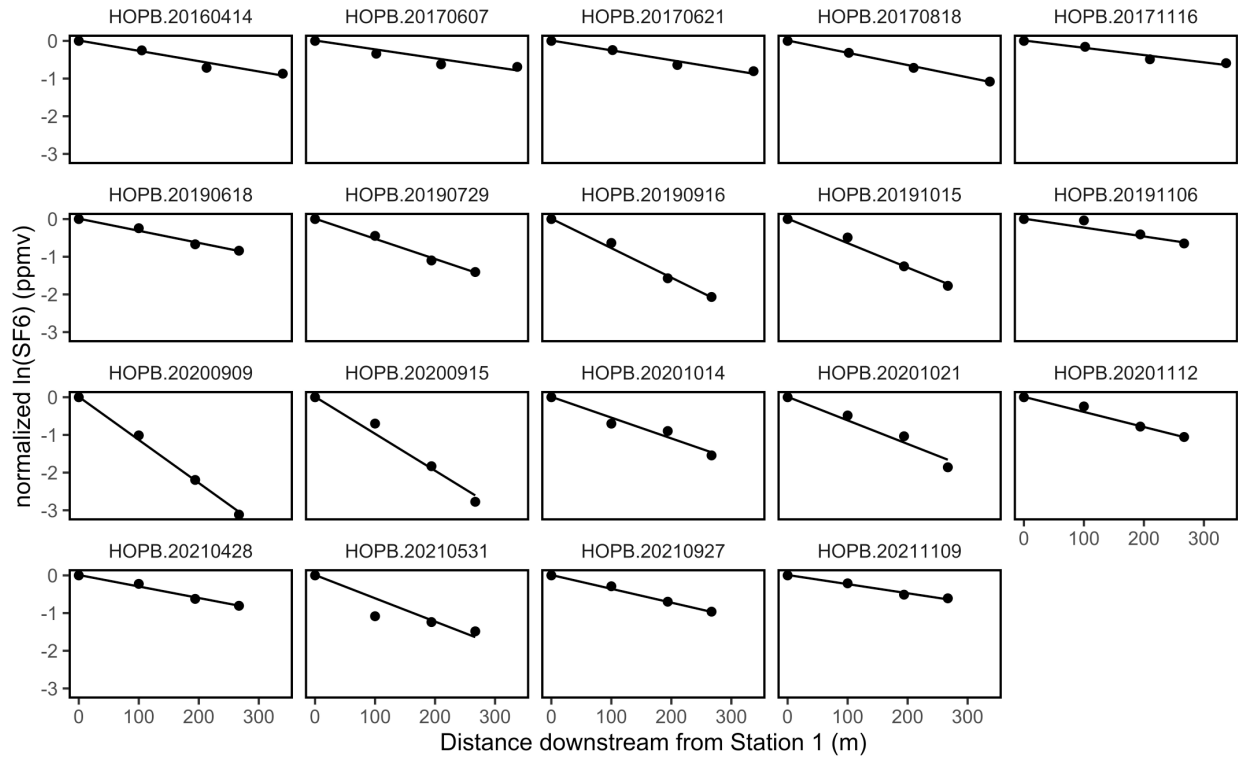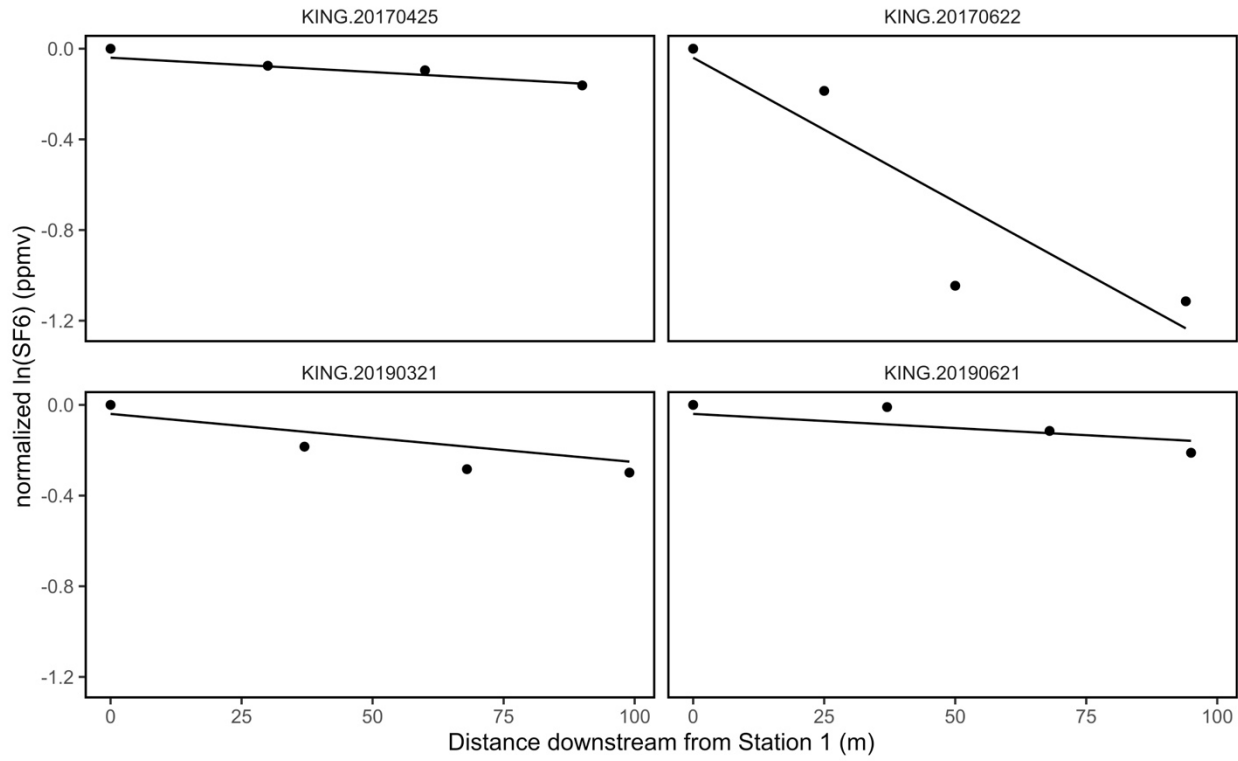

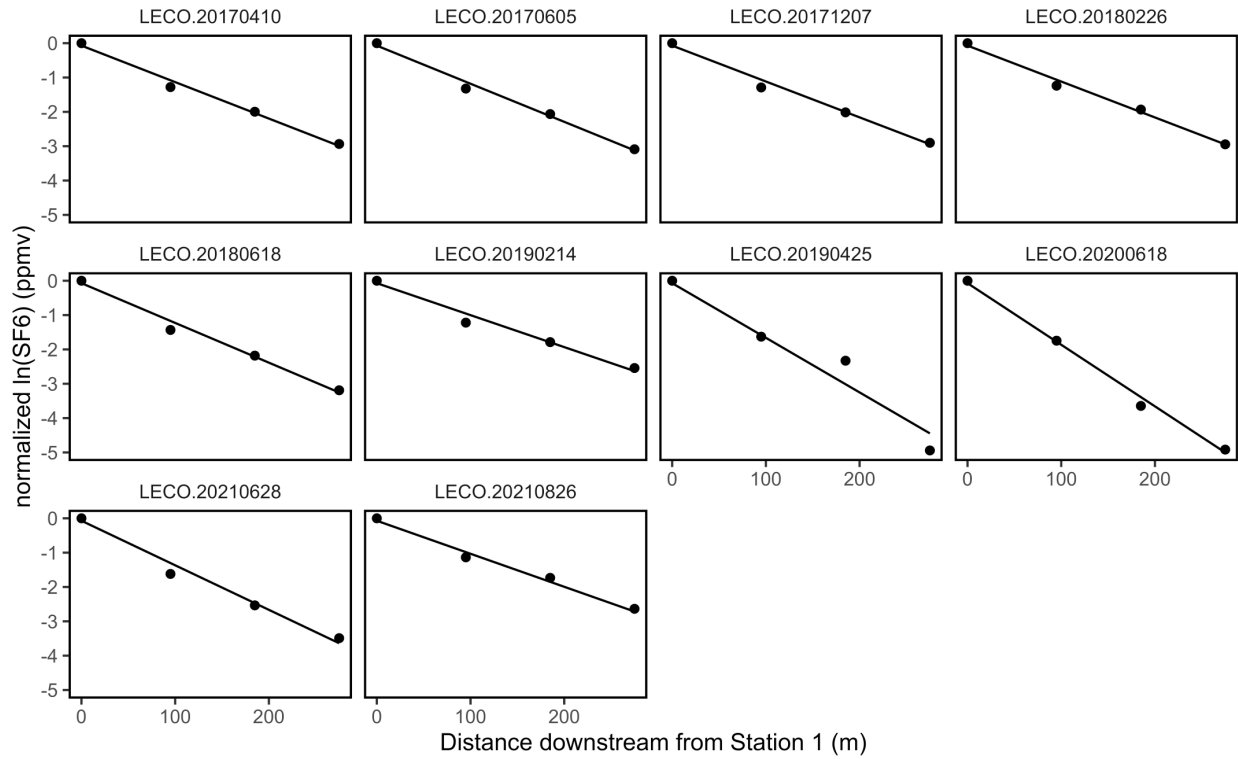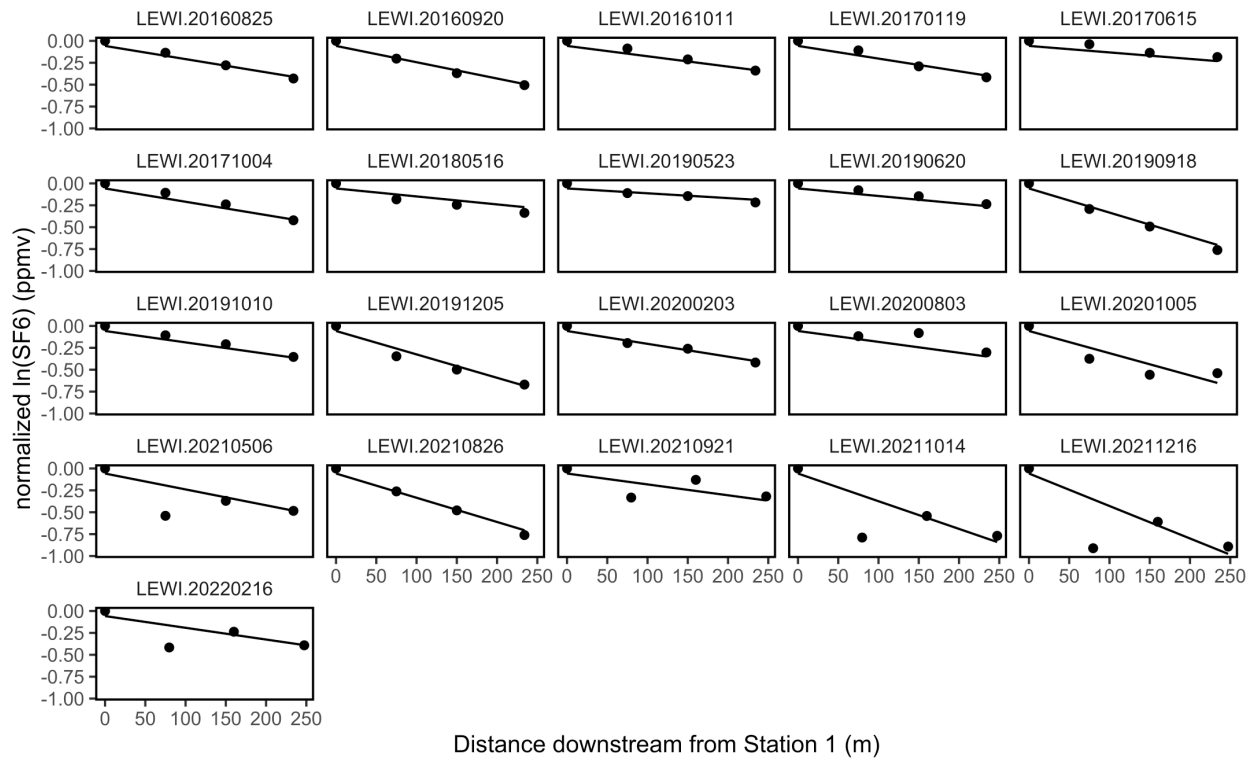

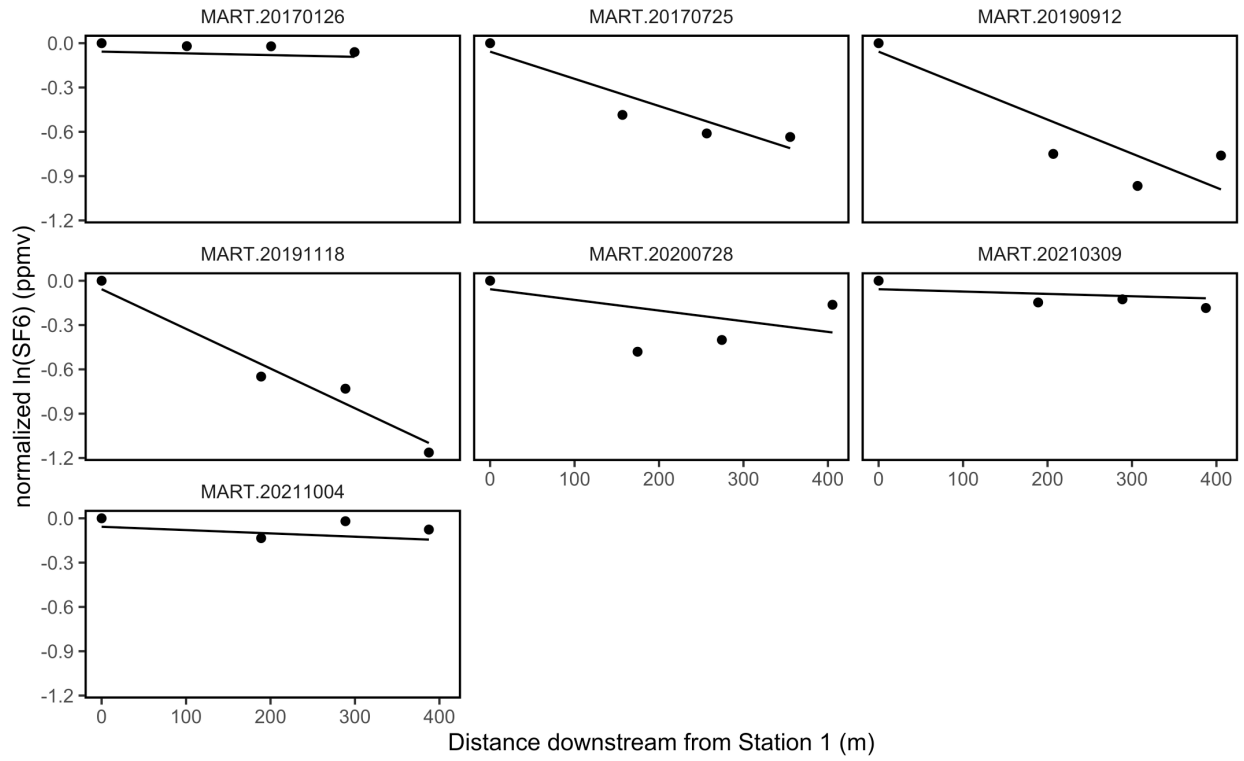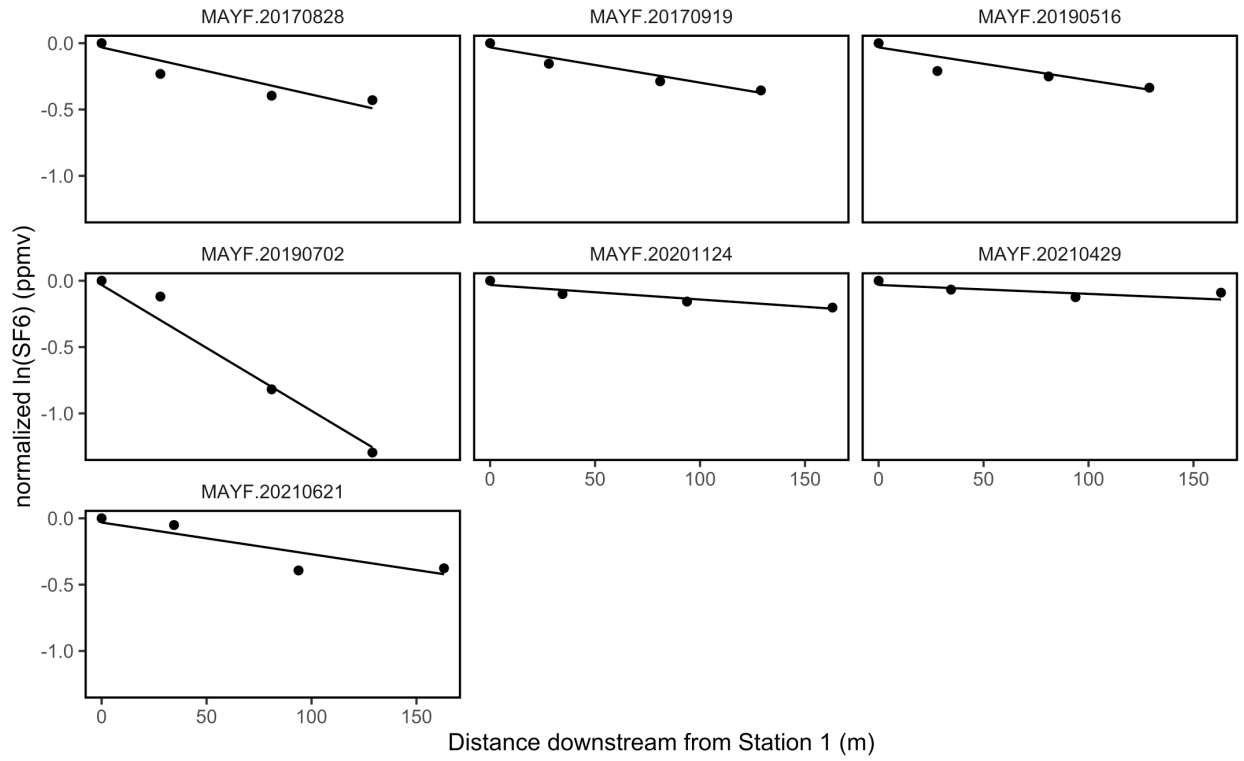

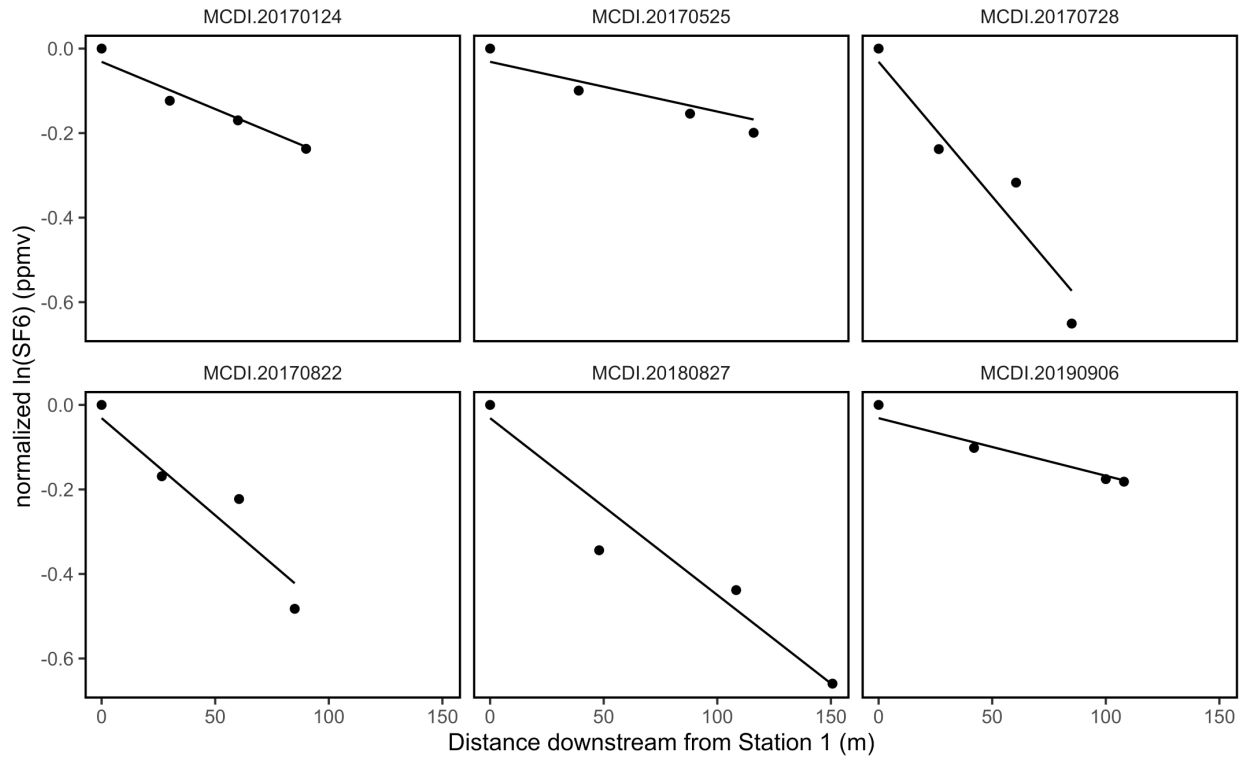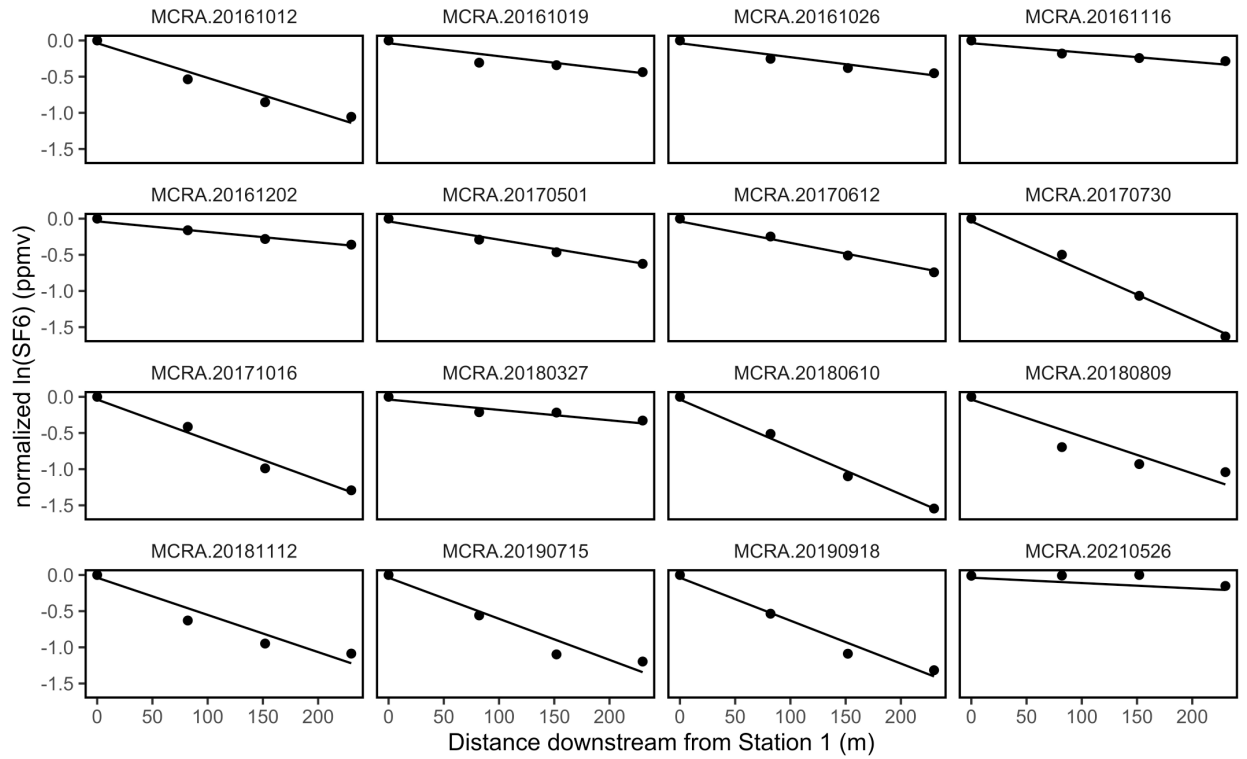

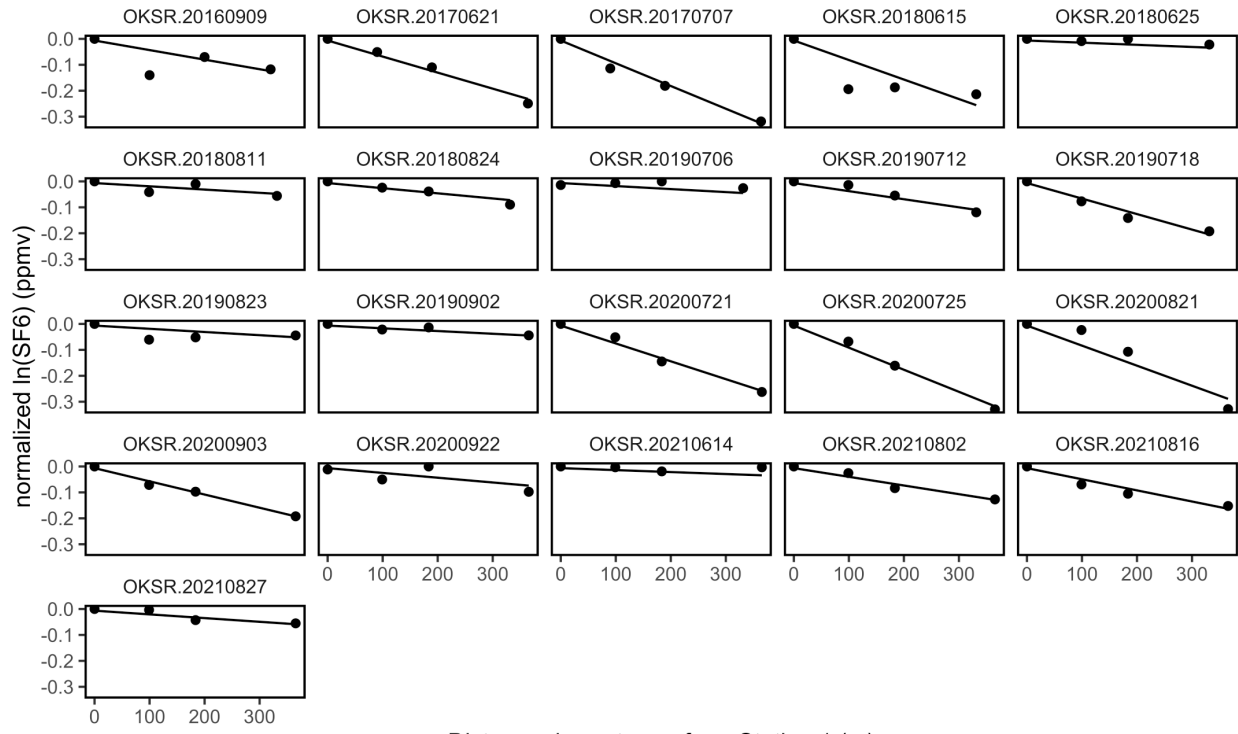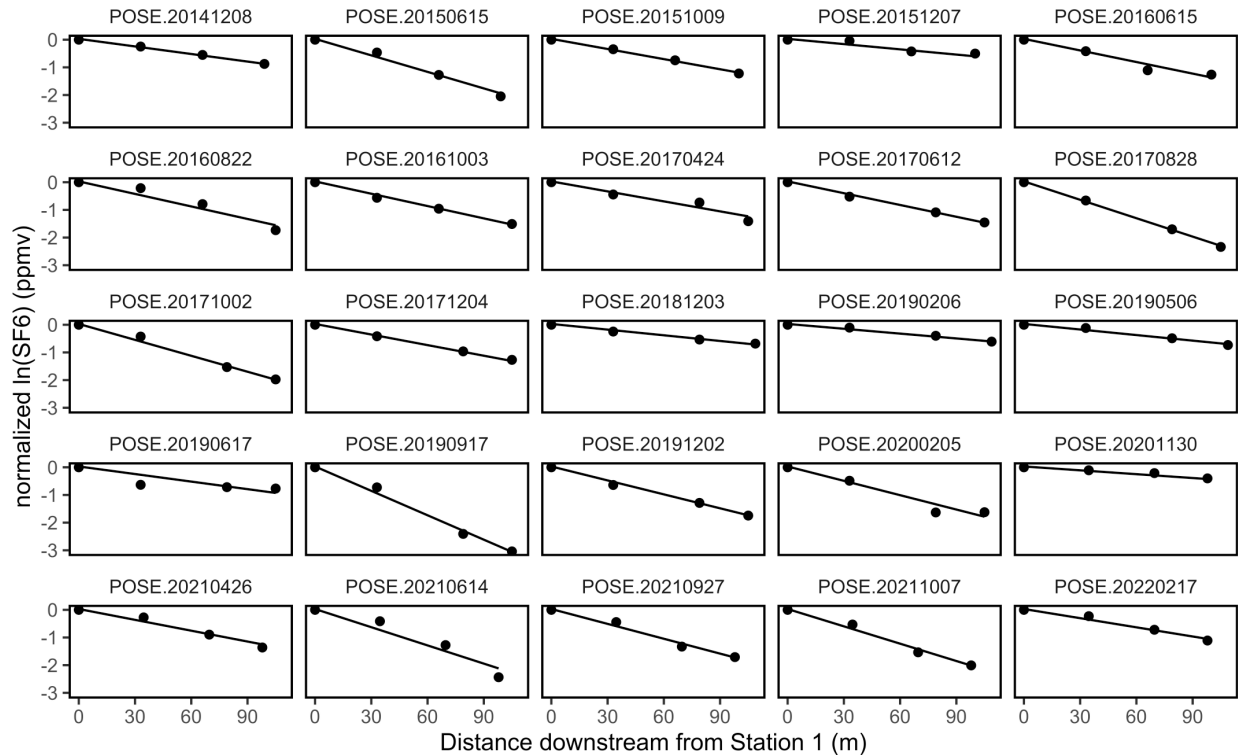

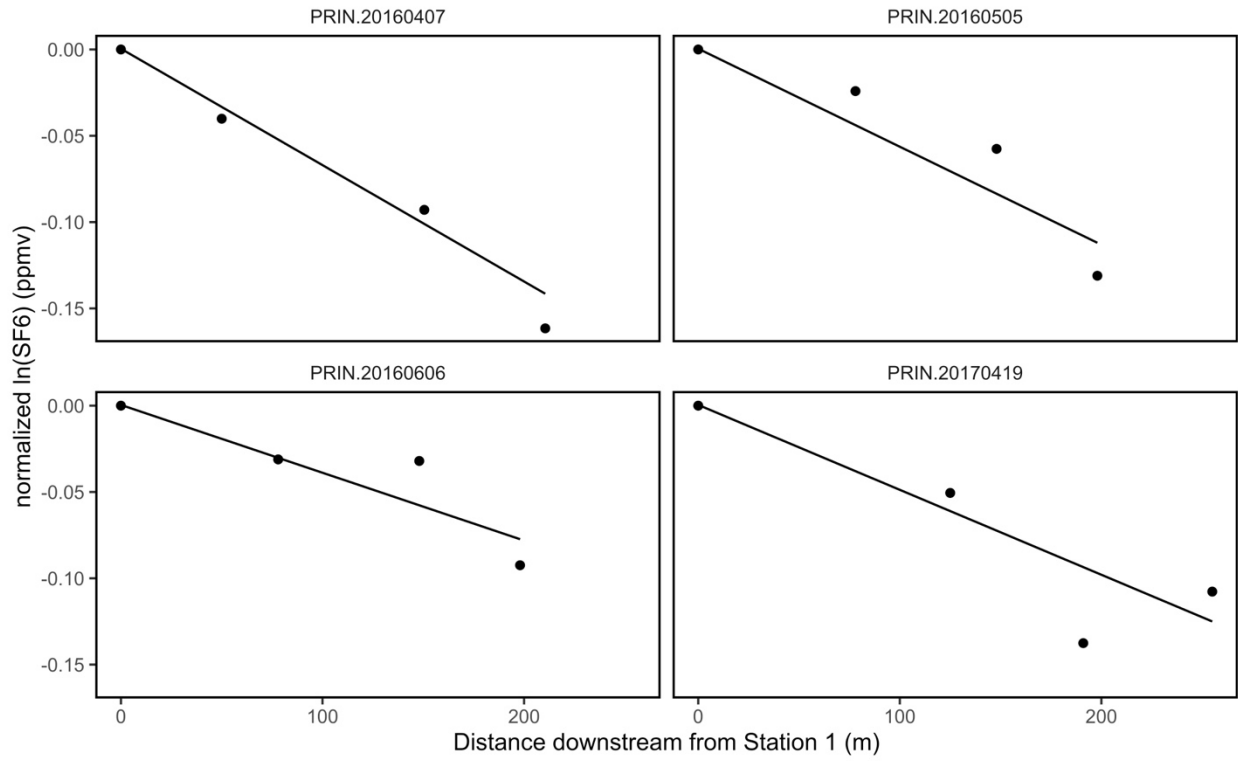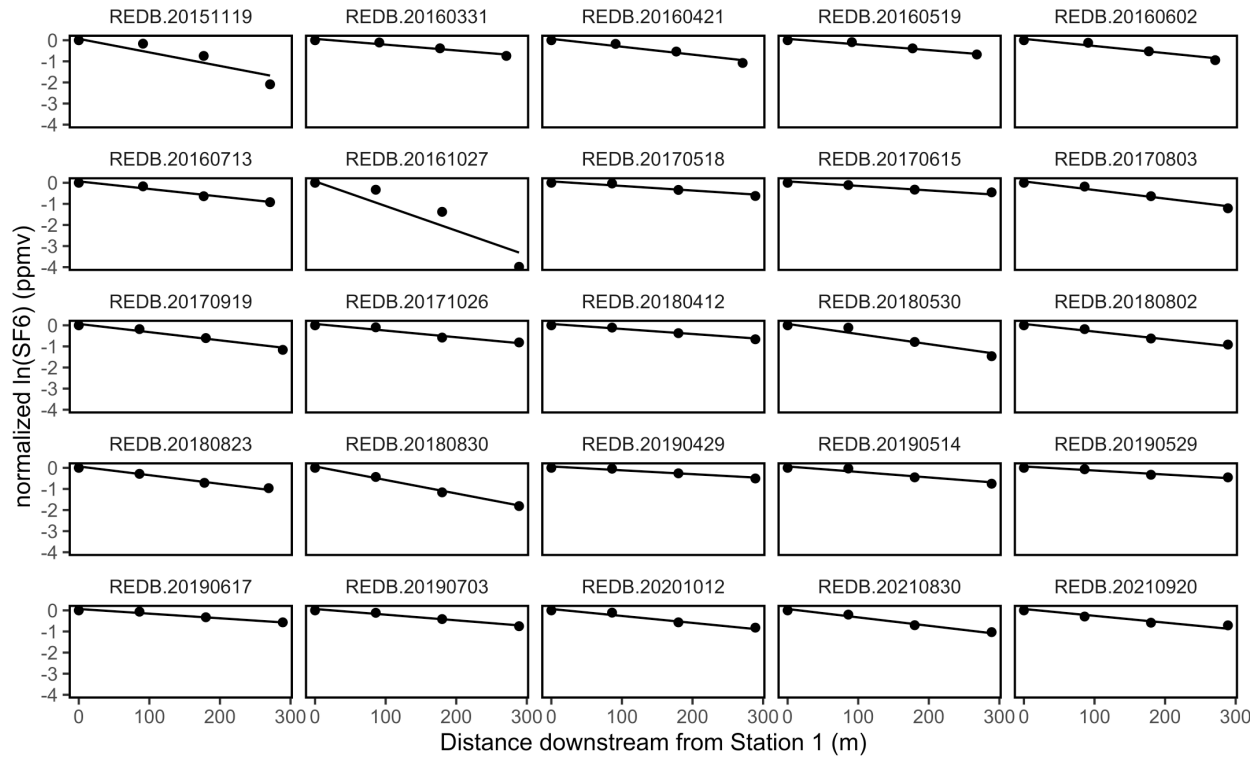

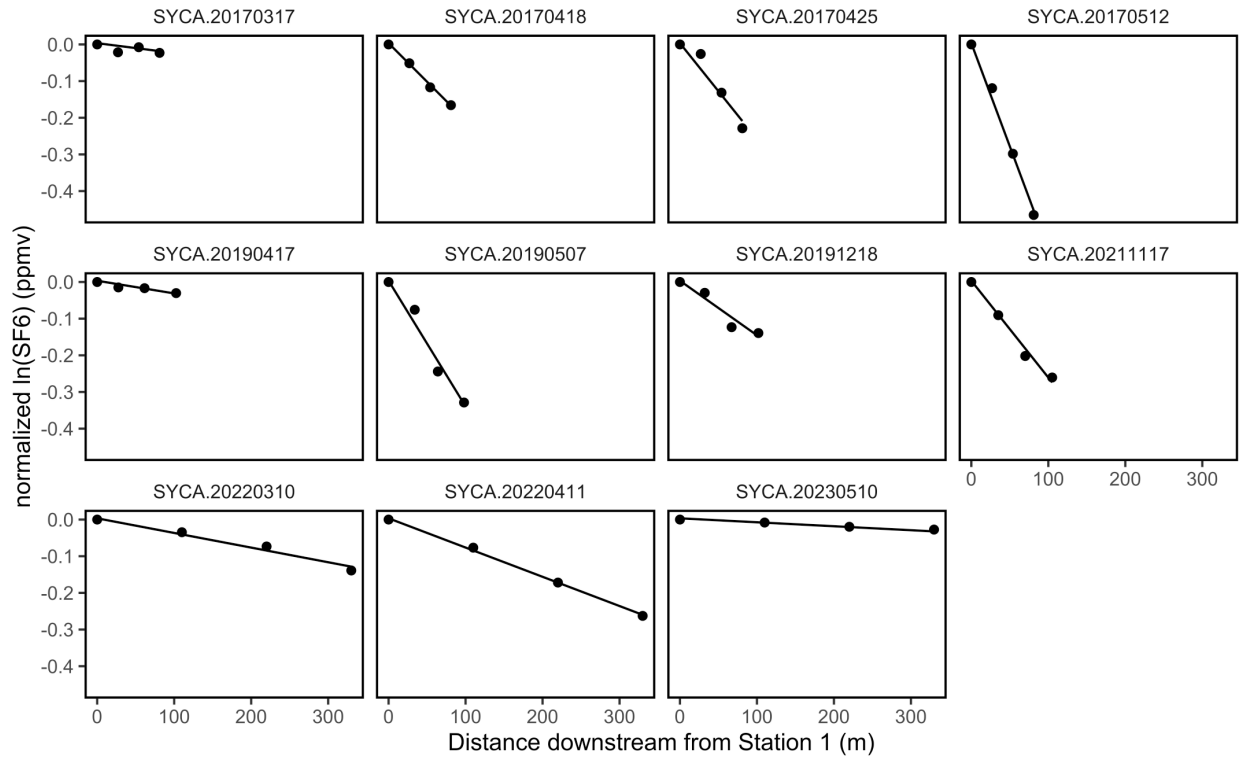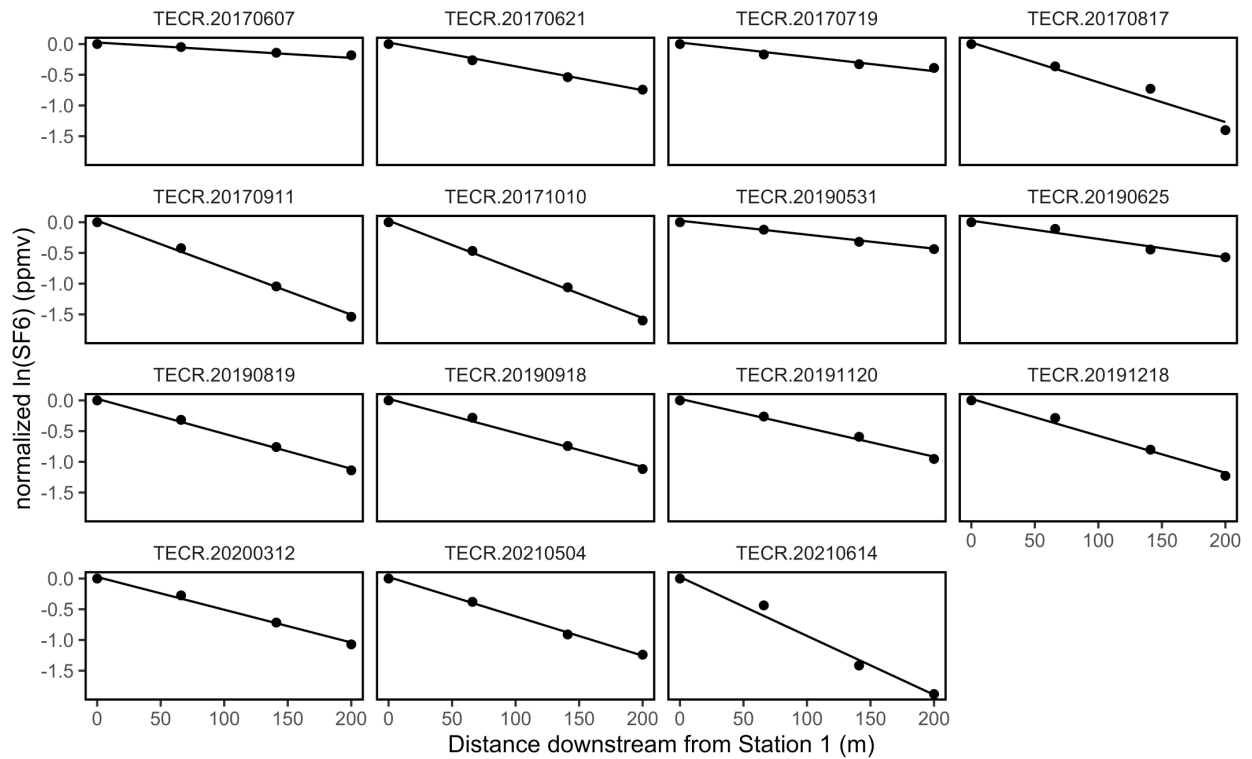



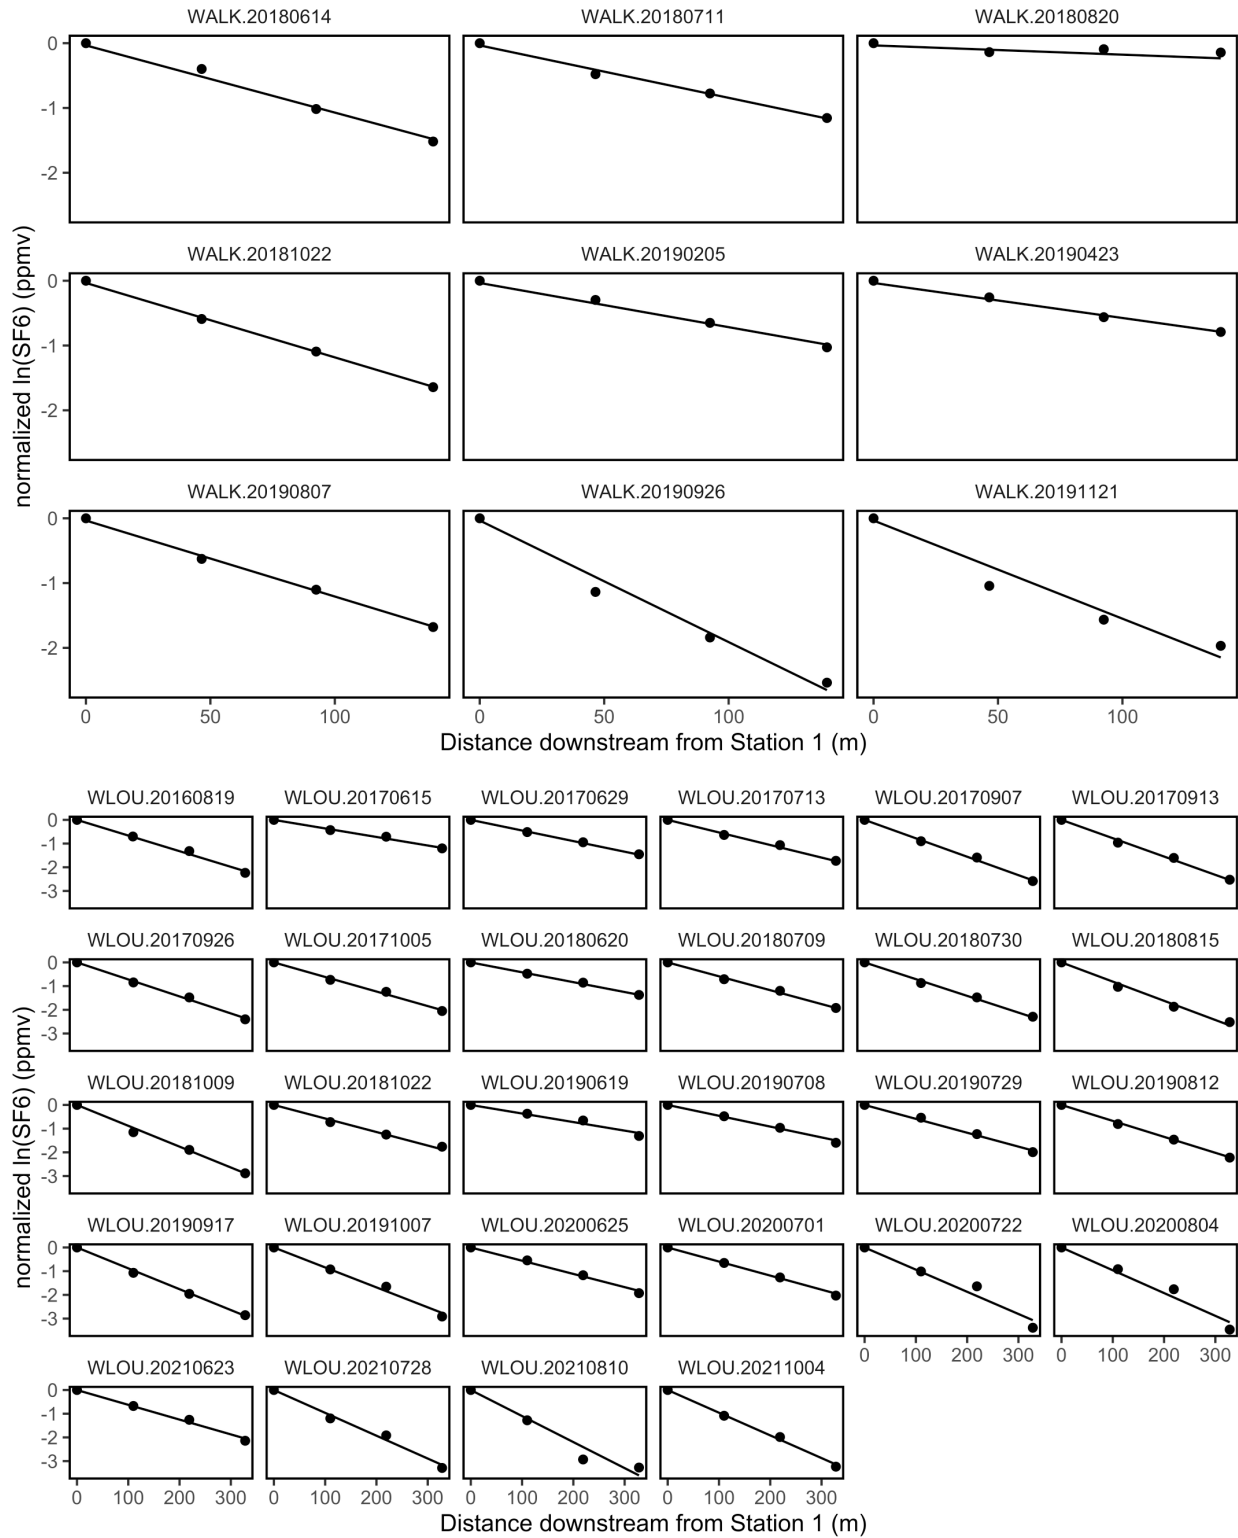

Figure S2. Model fits for Bayesian  $K_{600}$  models.

# COMO

stan k600 (no salt vs salt correction)

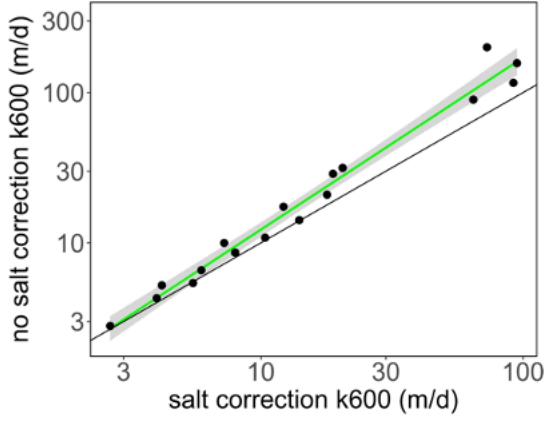

# CUPE

stan k600 (no salt vs salt correction)

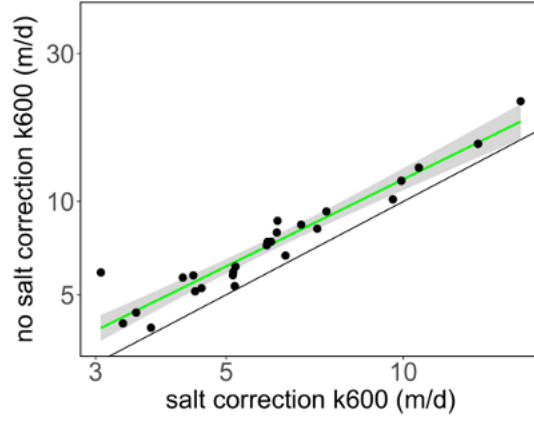

# GUIL

stan k600 (no salt vs salt correction)

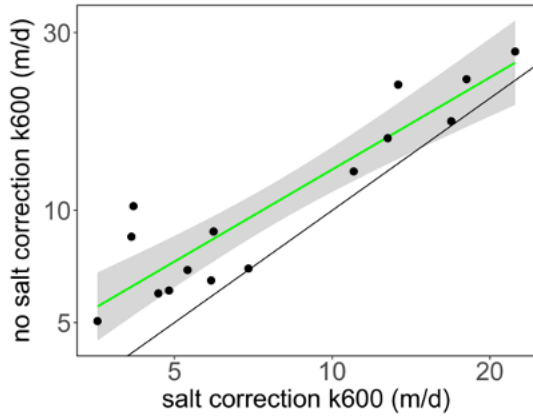

# MART

stan k600 (no salt vs salt correction)

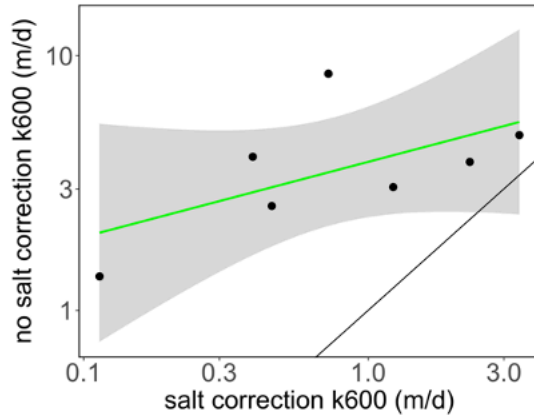

# POSE

stan k600 (no salt vs salt correction)

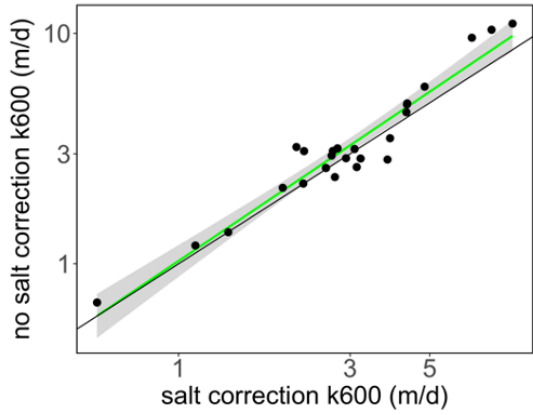

# TECR

stan k600 (no salt vs salt correction)

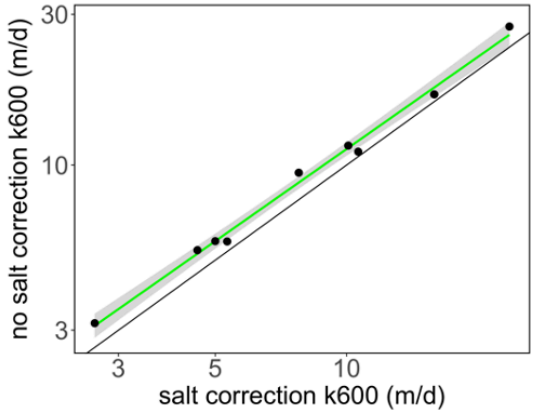

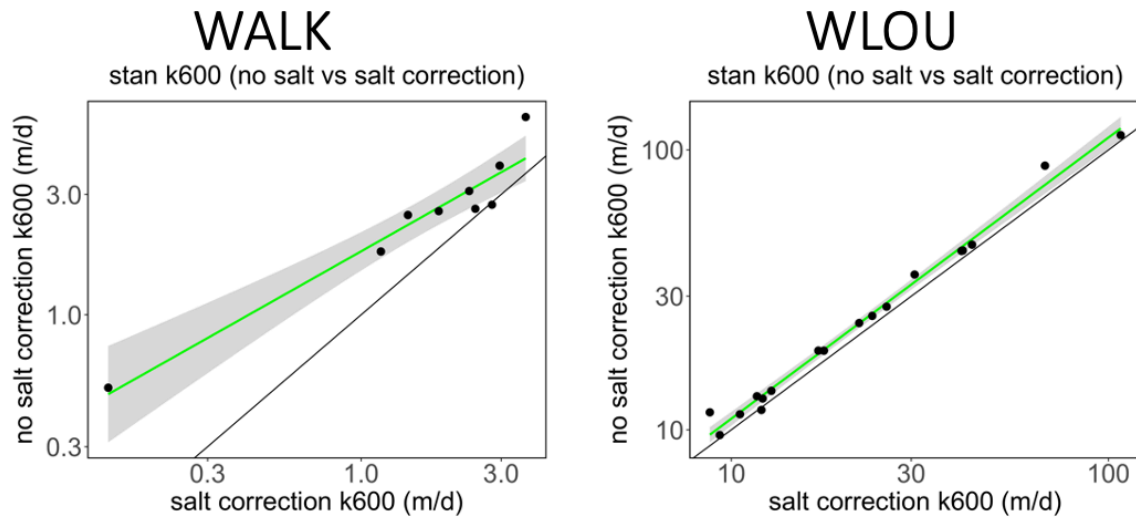

Figure S3. Comparison of salt-corrected  $k_{600}$  and uncorrected  $k_{600}$  for sites where a salt-correction was possible. A salt-correction is only recommended for COMO, CUPE, GUIL, MART, and WALK.

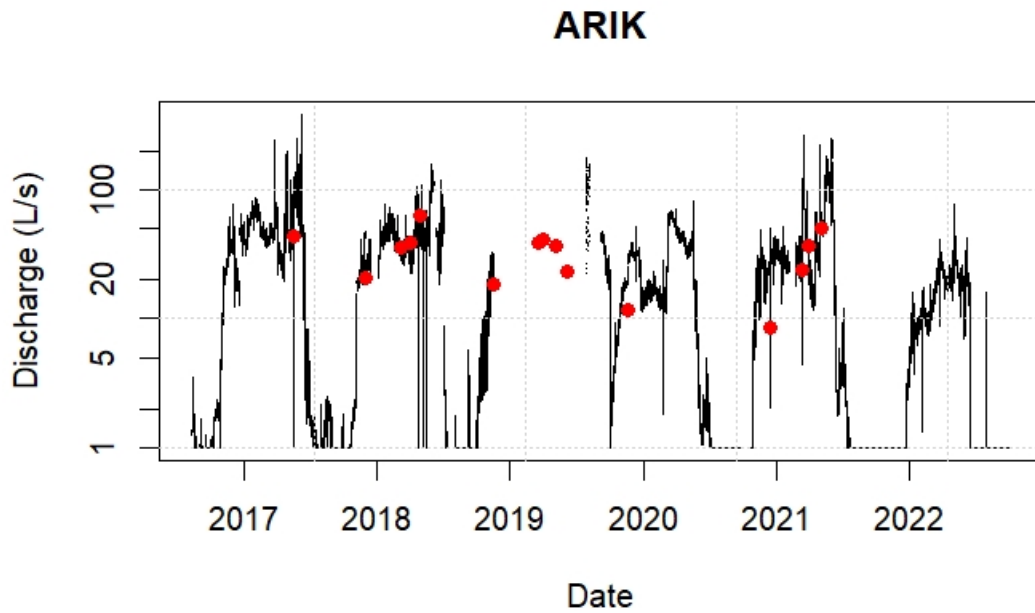

### BIGC

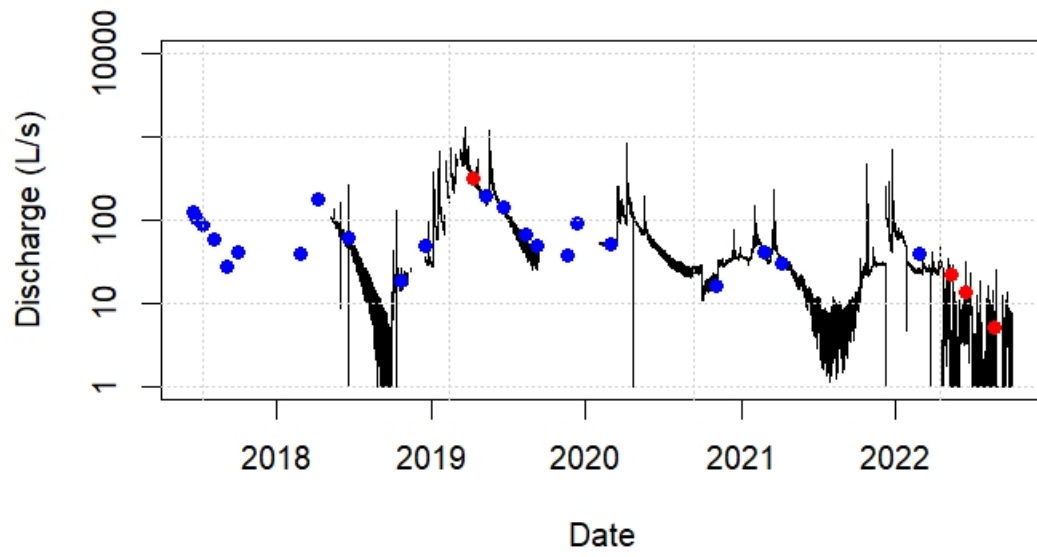

### BLUE

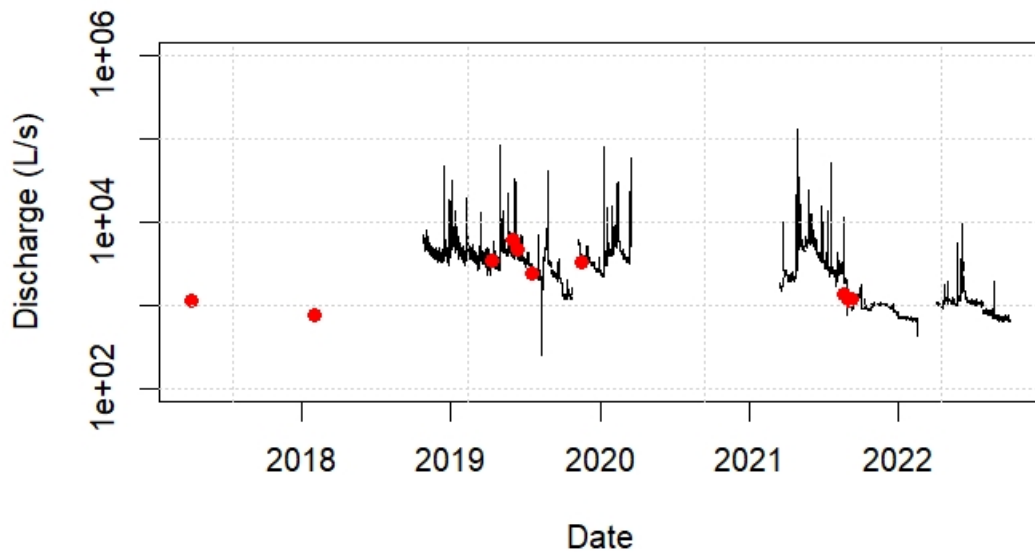

### CARI

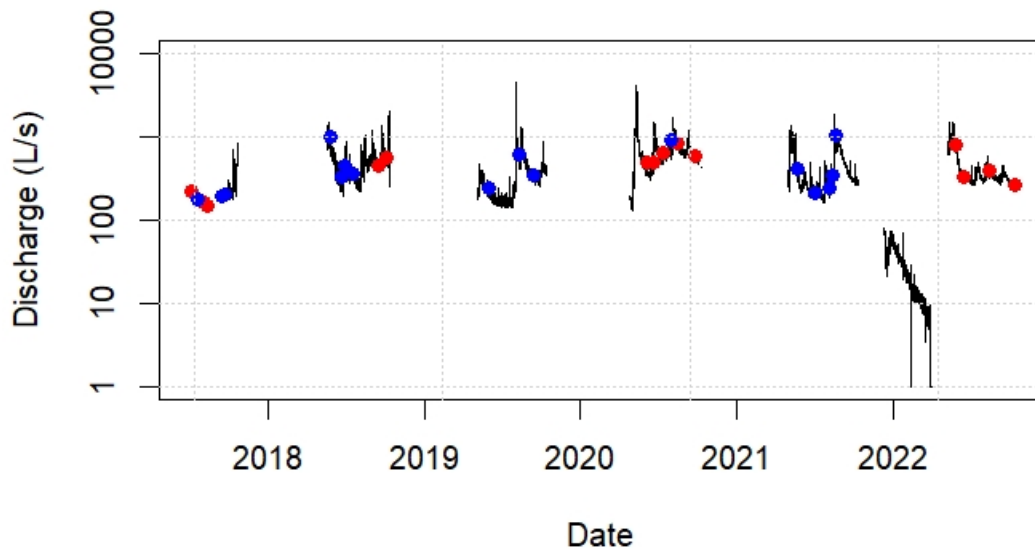

### COMO

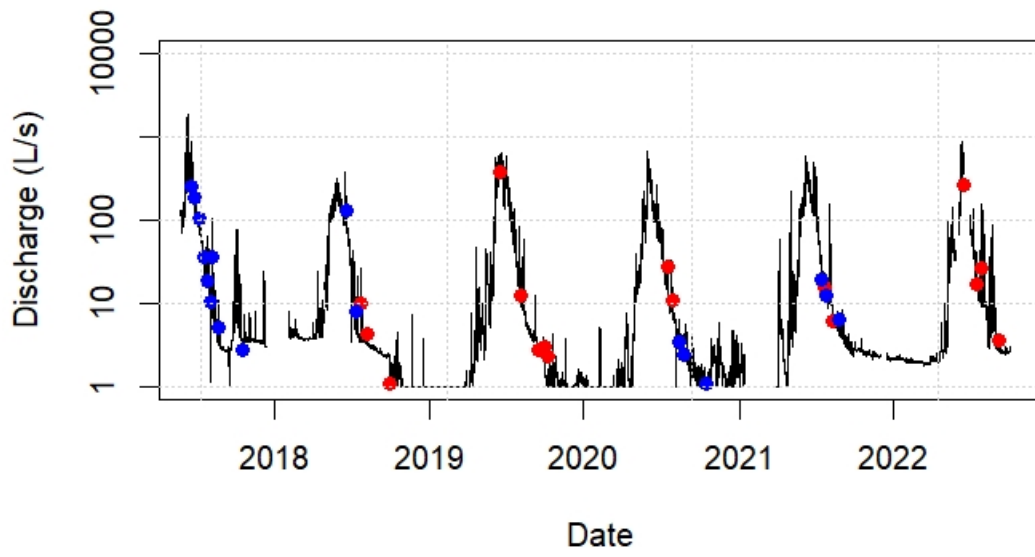

### CUPE

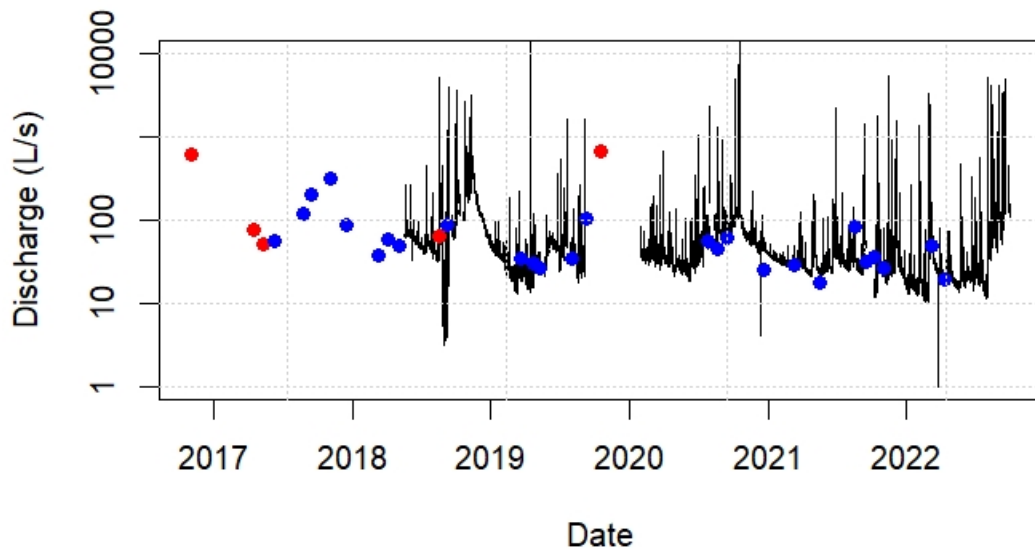

### GUIL

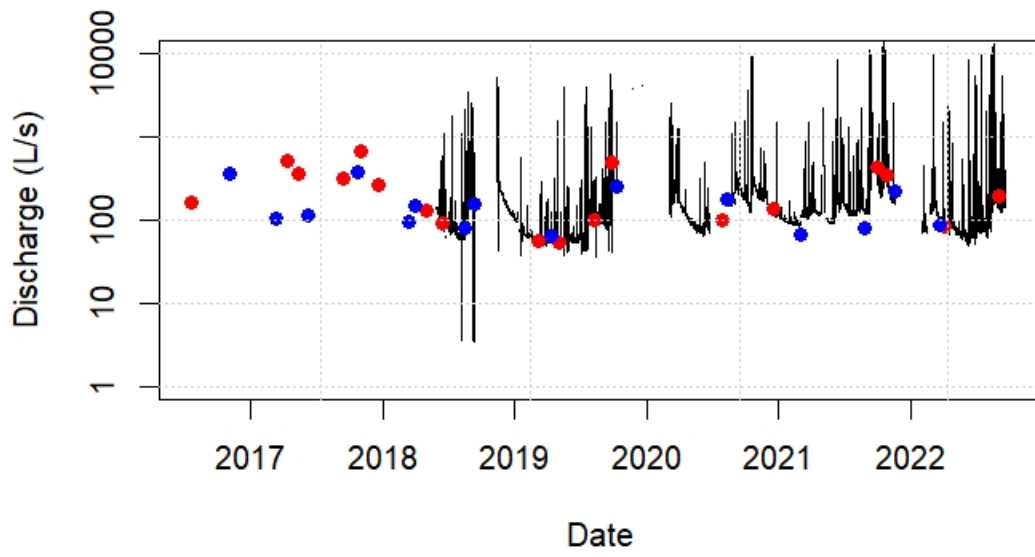

### HOPB

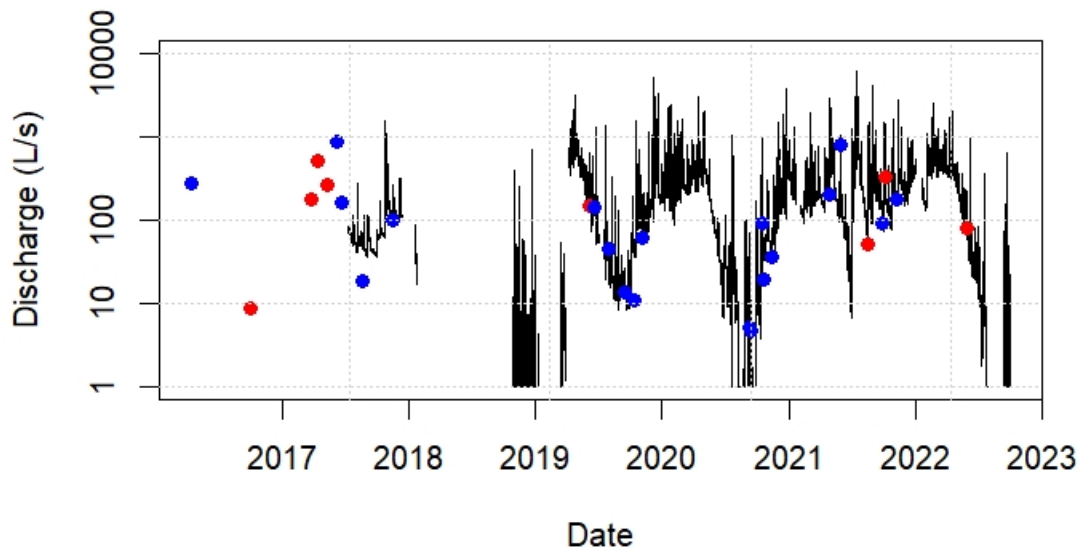

### KING

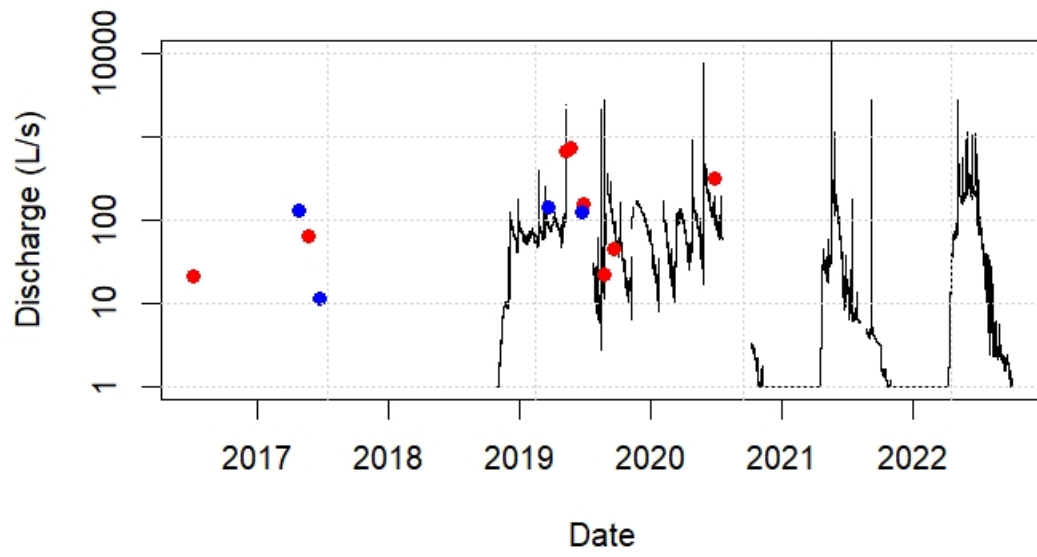

### LECO

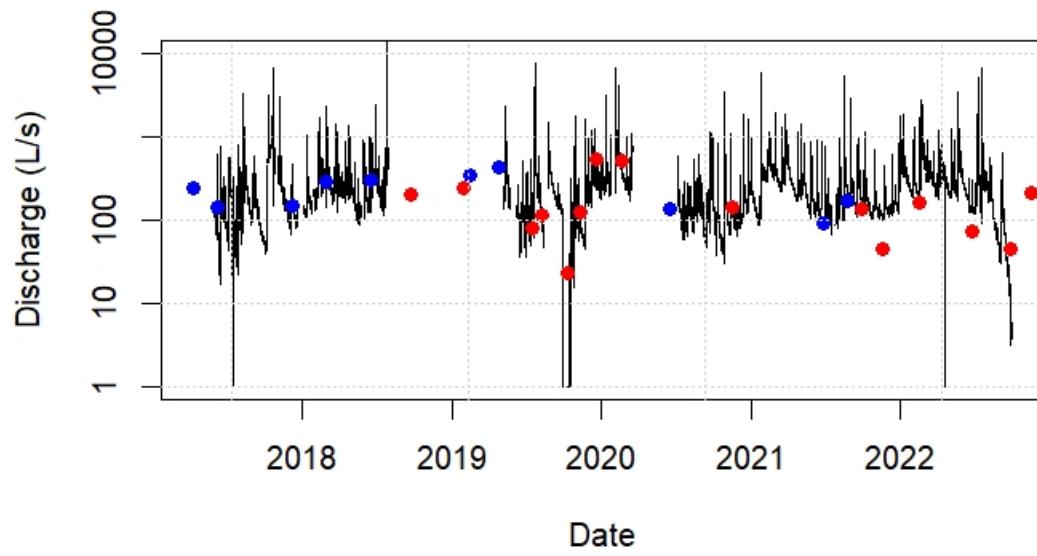



### LEWI

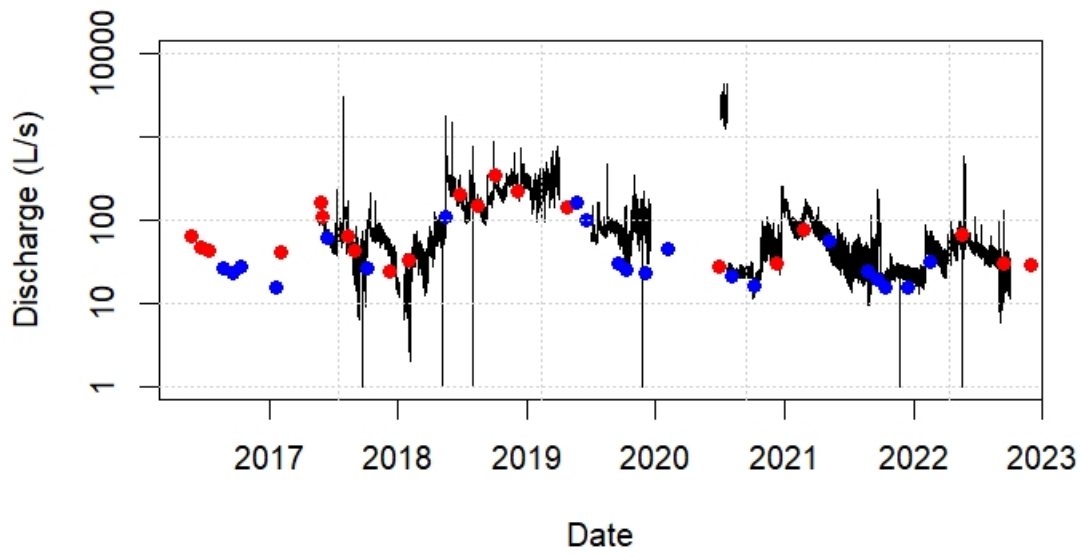

### MART

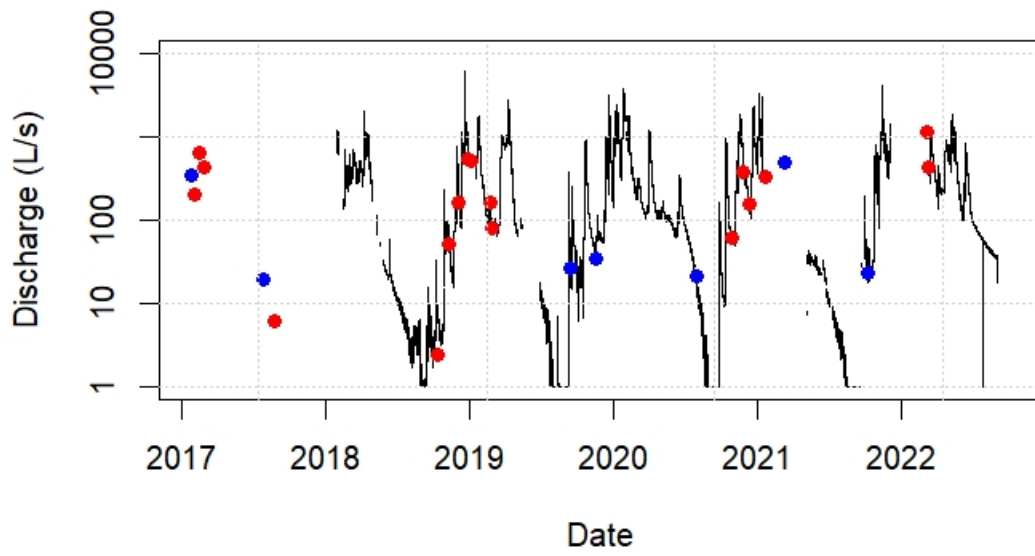

### MAYF

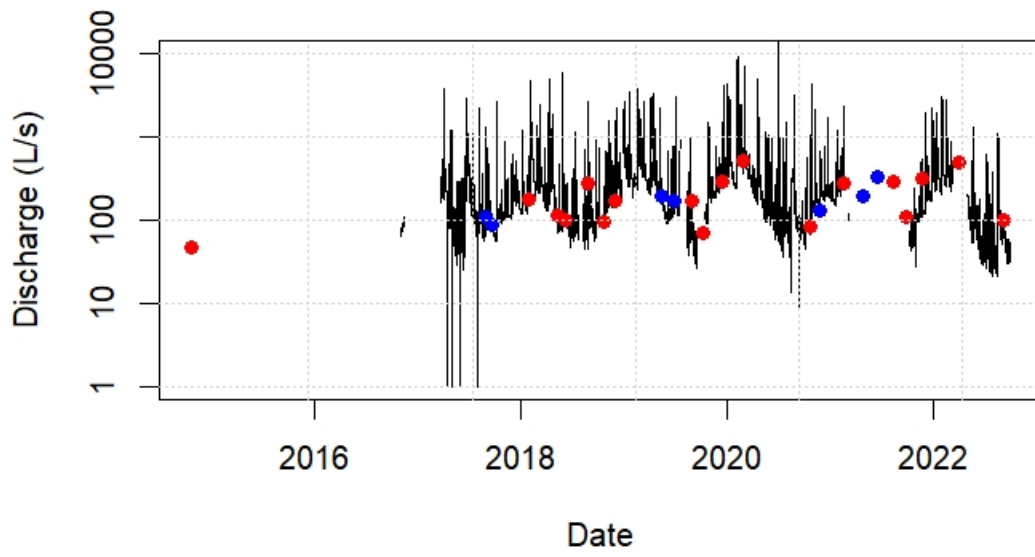

### MCDI

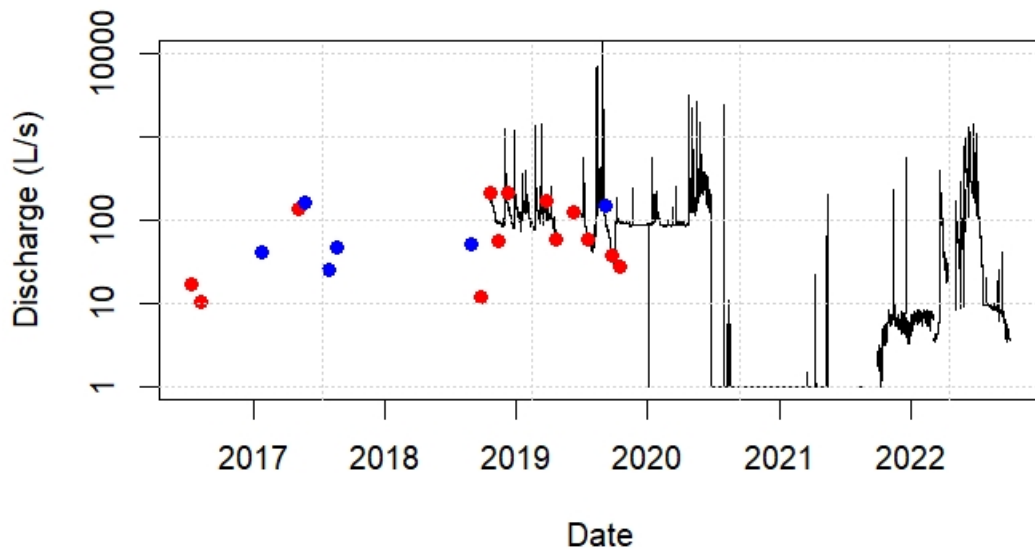

### MCRA

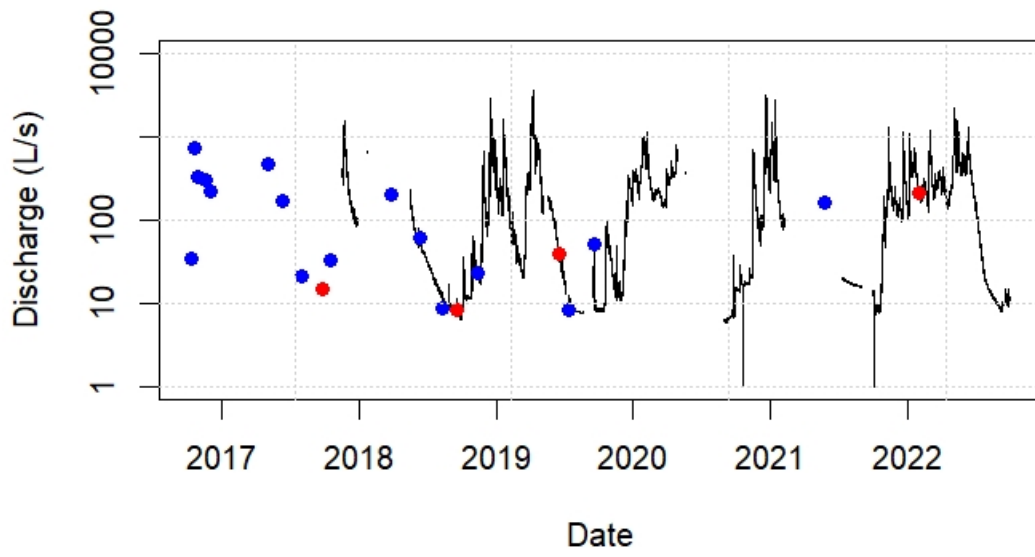

### OKSR

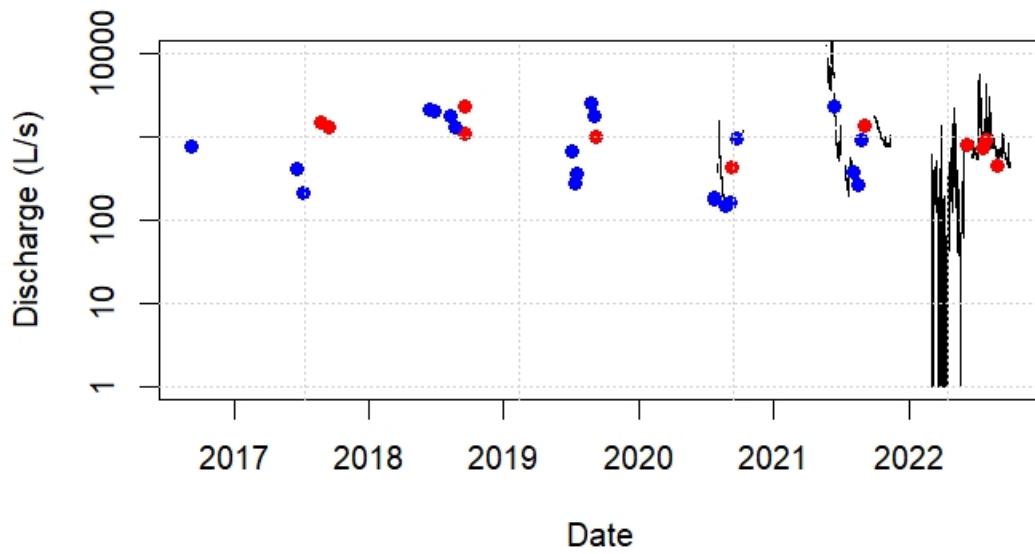

### POSE

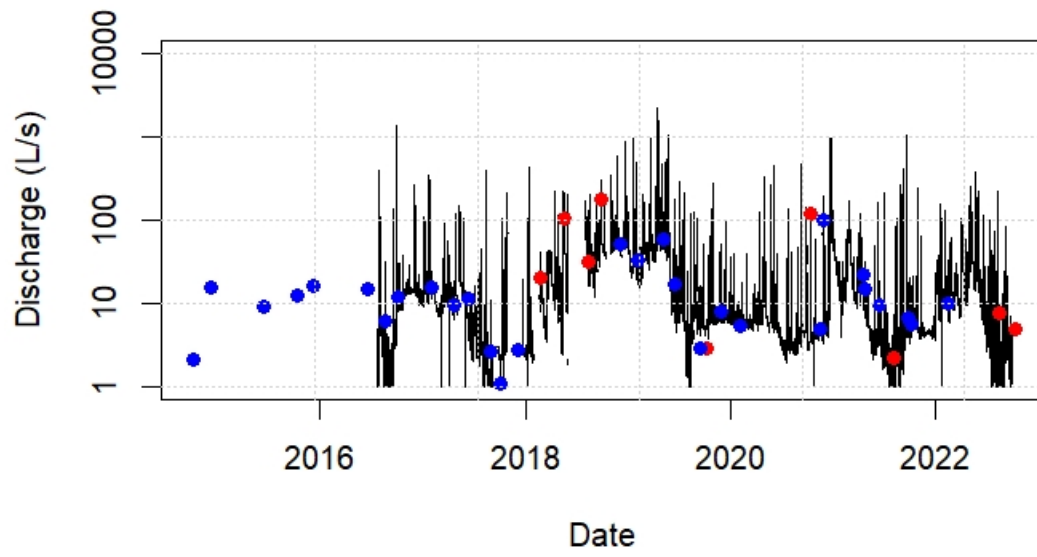

### PRIN

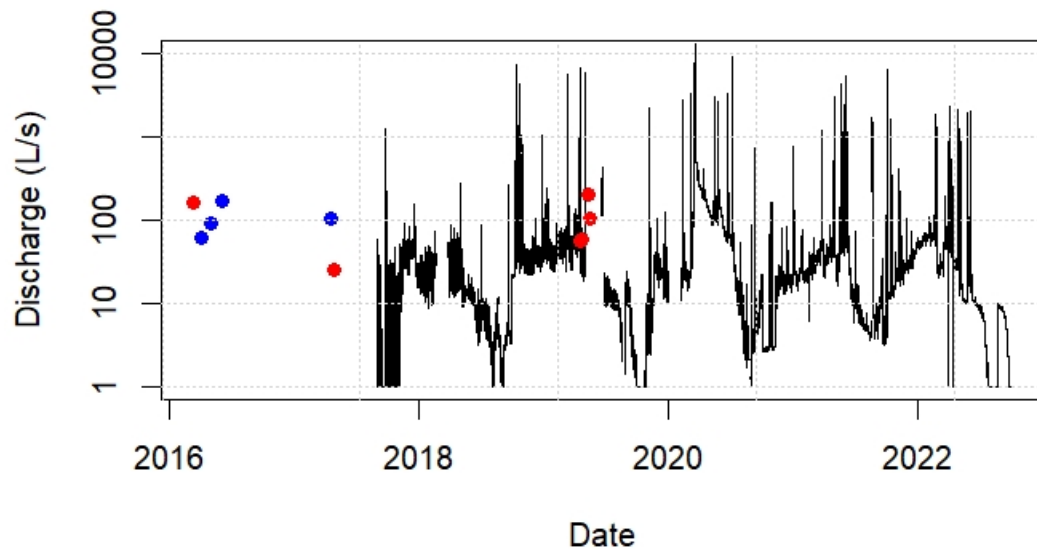

### REDB

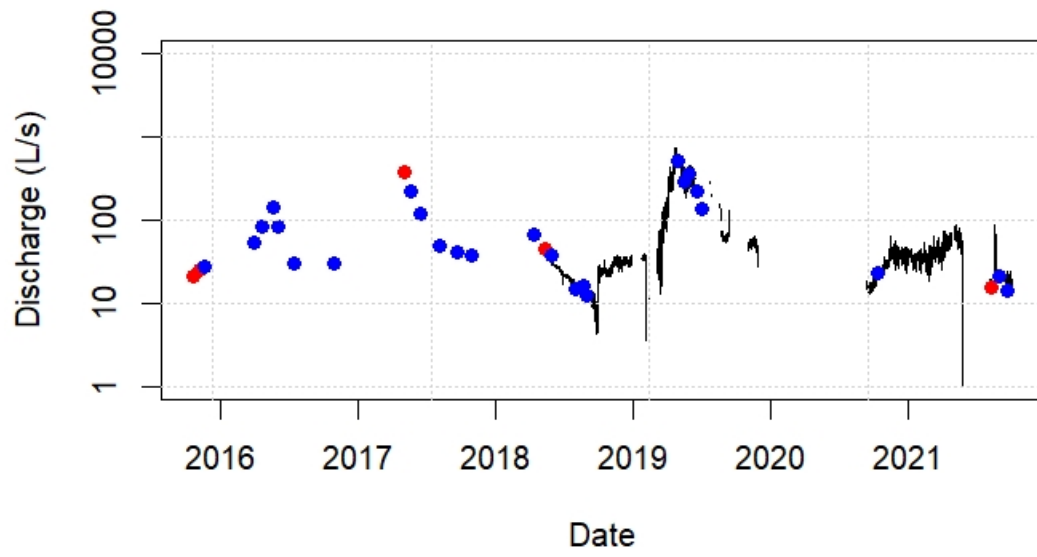

### SYCA

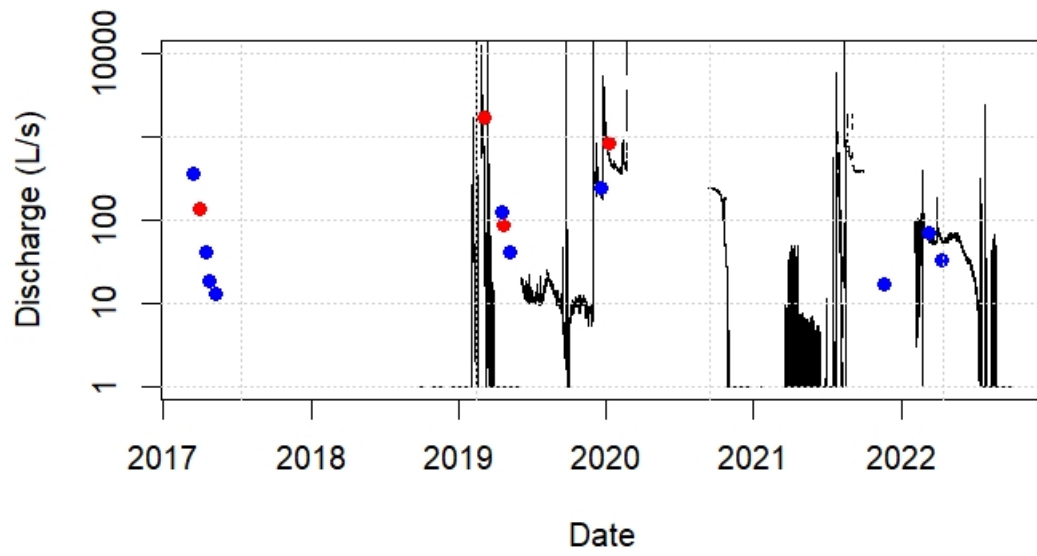

### TECR

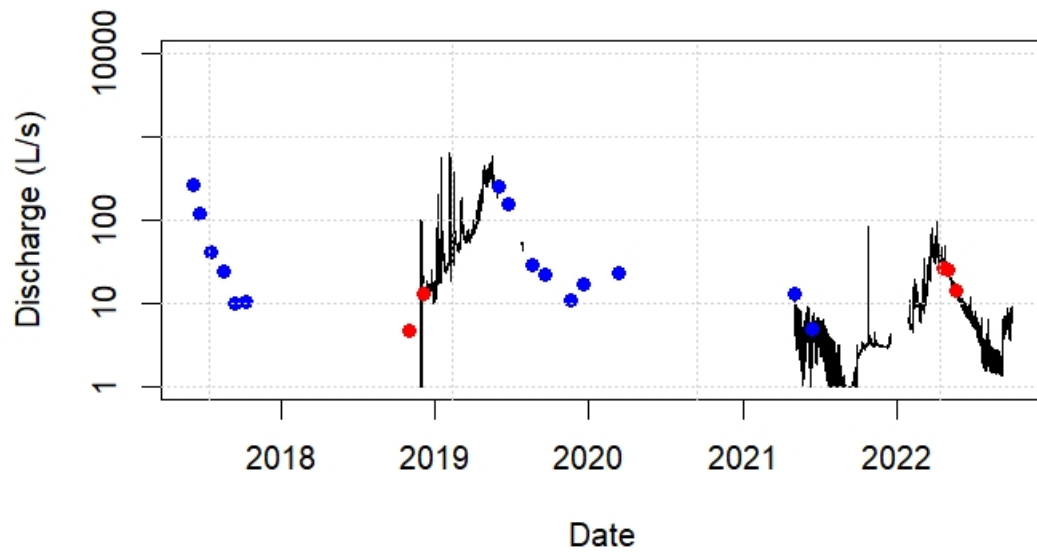

### WALK

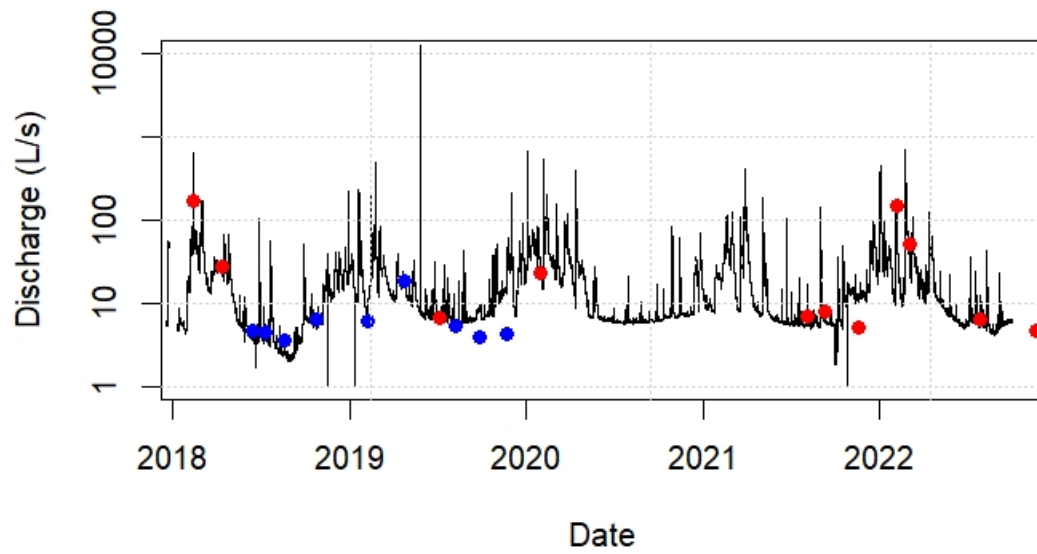

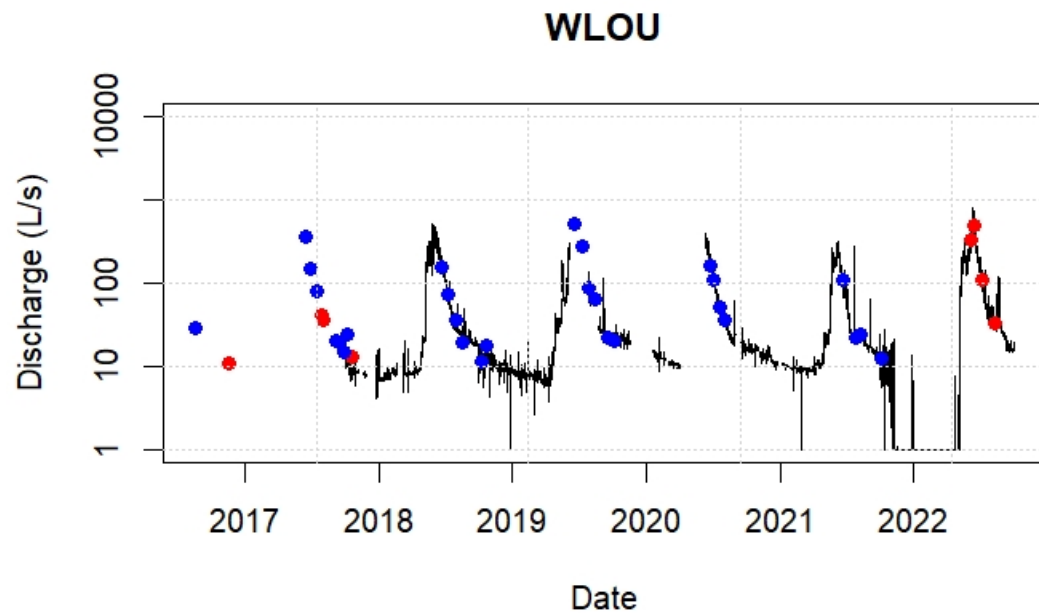

Figure S4. Hydrographs for each site, with points indicating the date and measured discharge during tracer-gas experiments that resulted in  $k_{600}$  and  $K_{600}$  estimates (blue) or salt-slug experiments that resulted in hydraulic geometry estimates (red). Continuous discharge estimates (lines) less than  $1 \text{ L s}^{-1}$  (including when the stream is dry) have been set to  $1 \text{ L s}^{-1}$  for plotting purposes. Breaks in the line indicate periods of time when estimates of continuous discharge are not available.

### ARIK

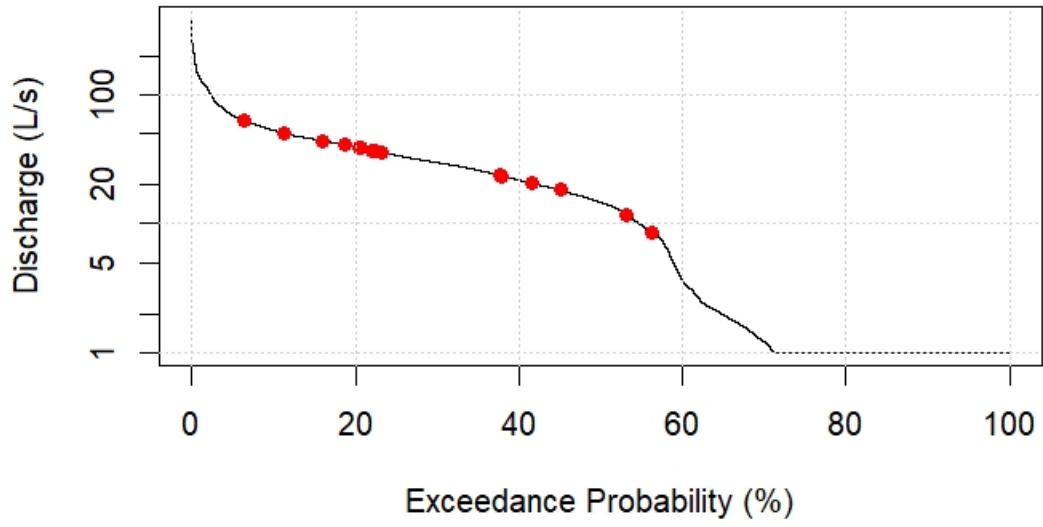

### BIGC

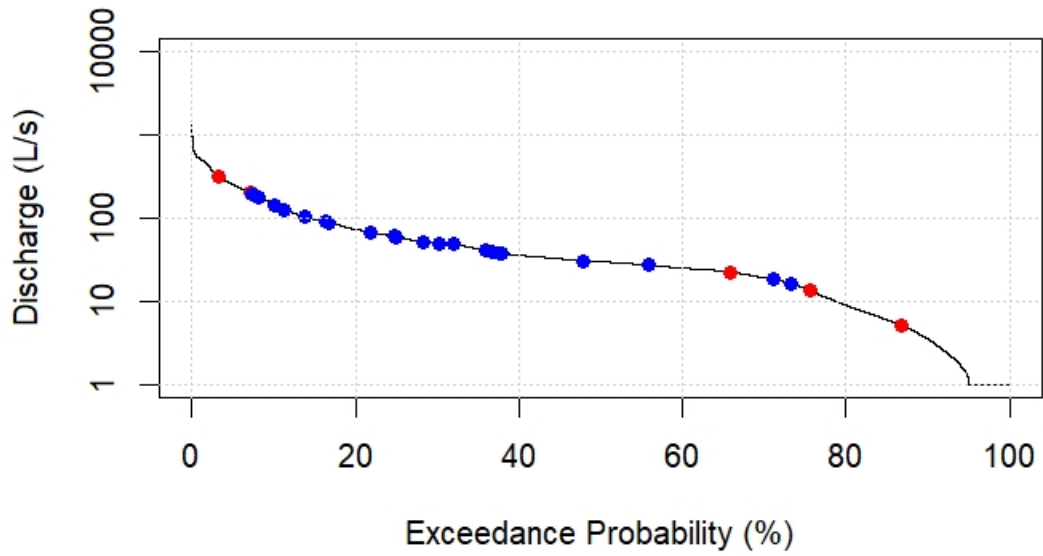



### BLDE

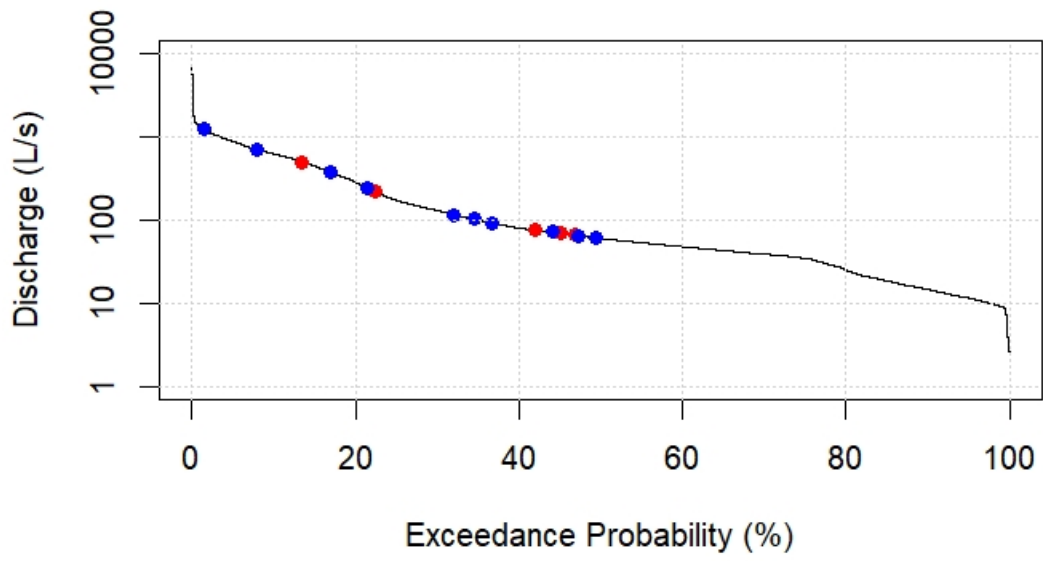

### BLUE

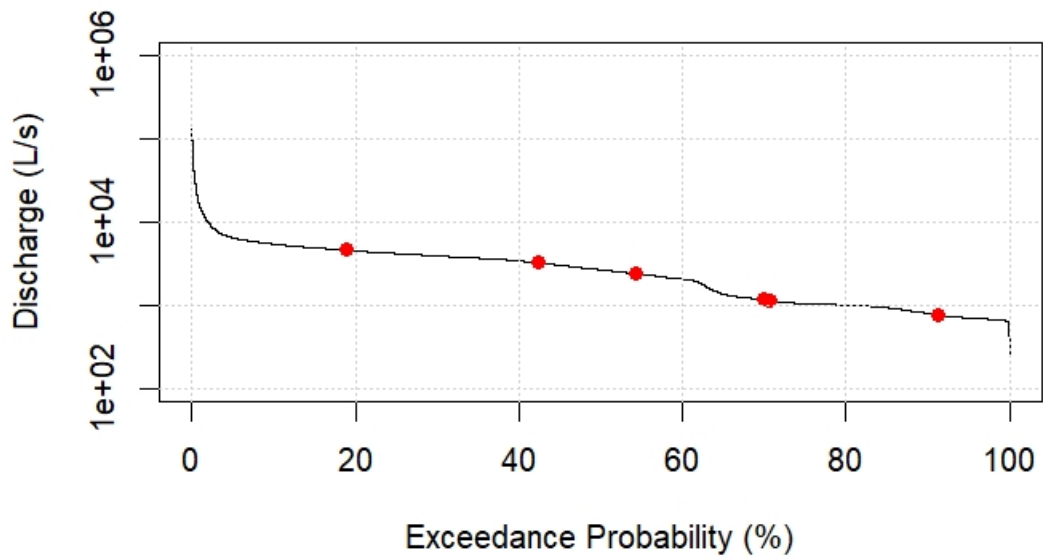

### CARI

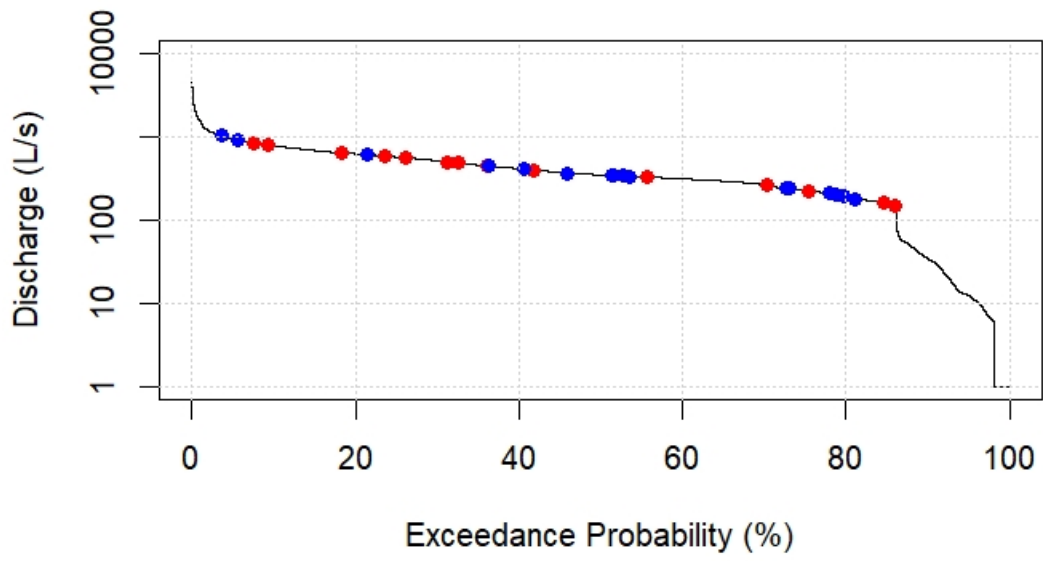

### COMO

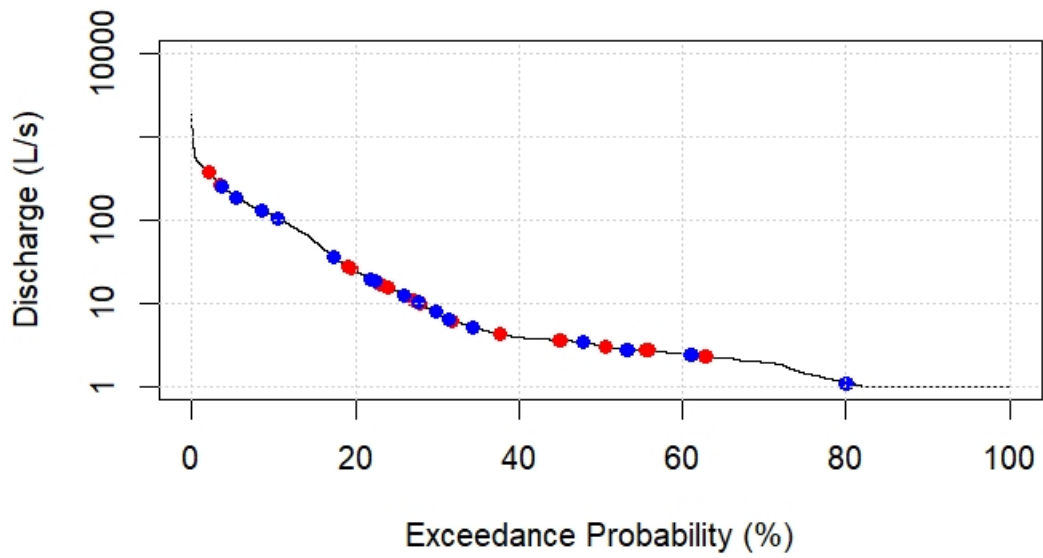

### CUPE

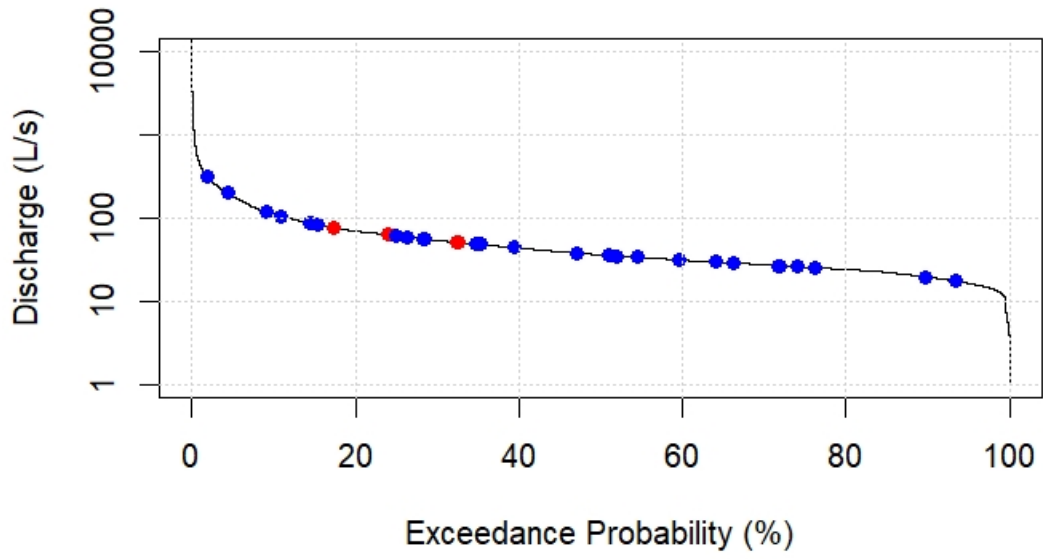

### GUIL

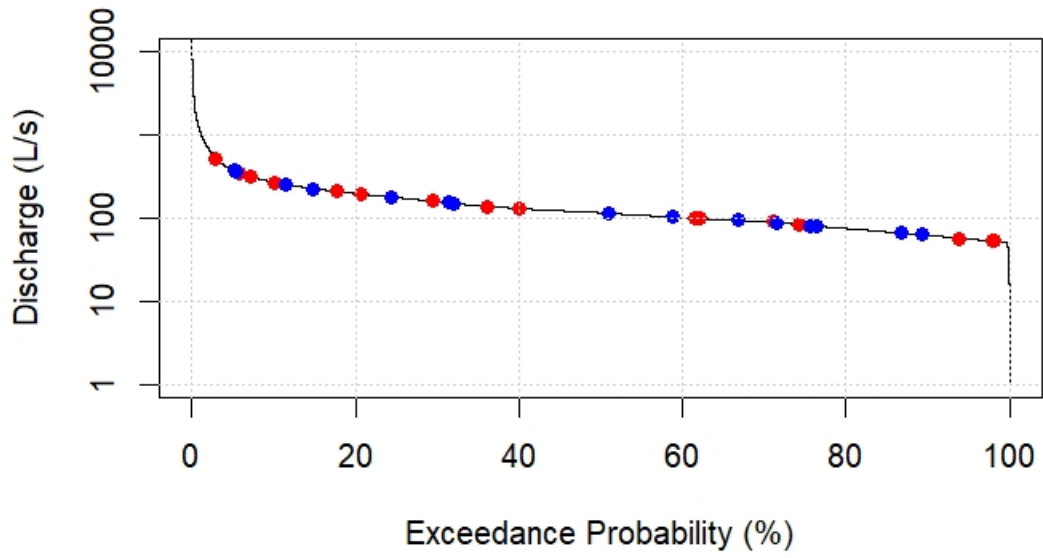

### HOPB

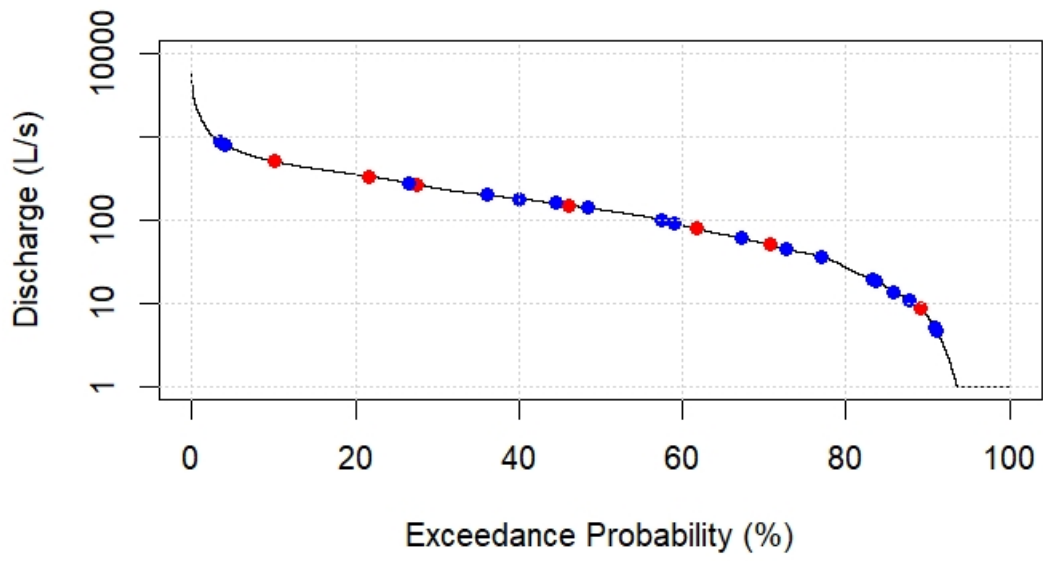

### KING

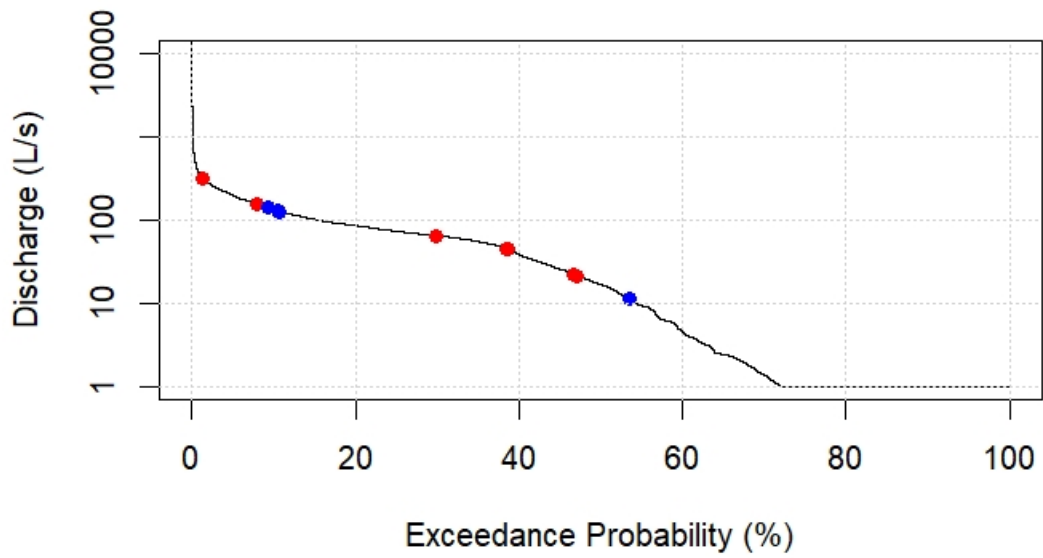

### LECO

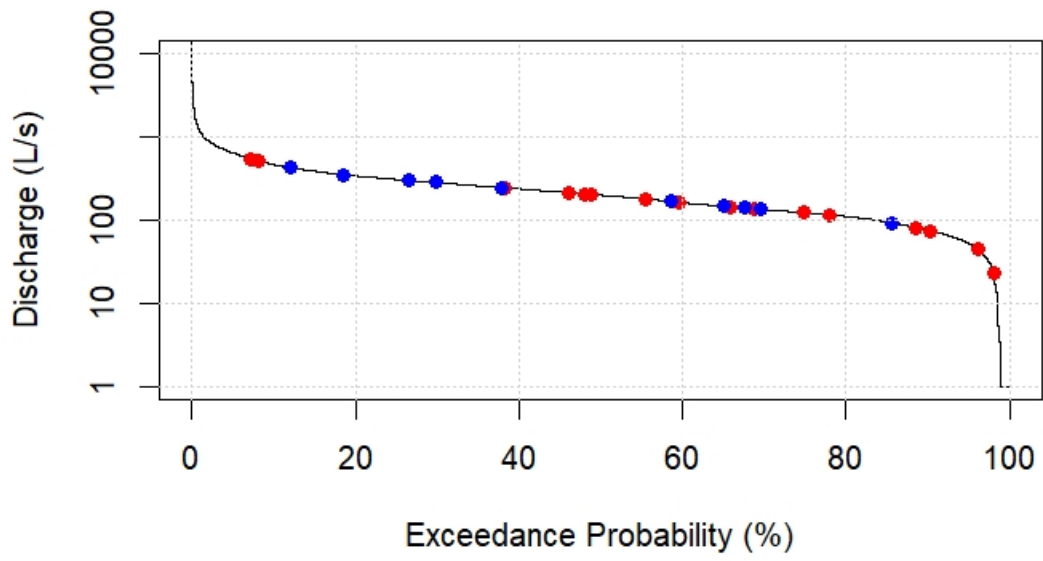

### LEWI

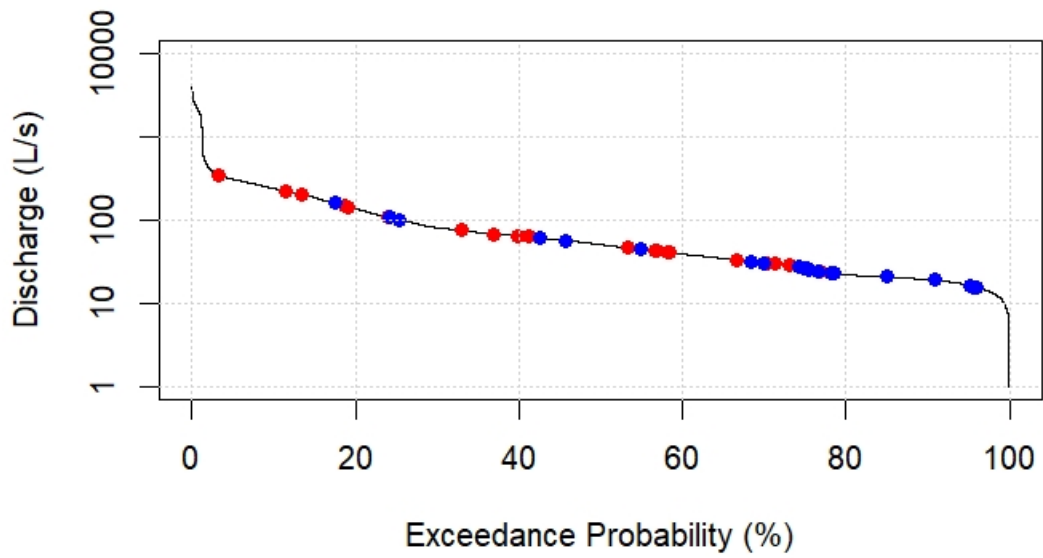

### MART

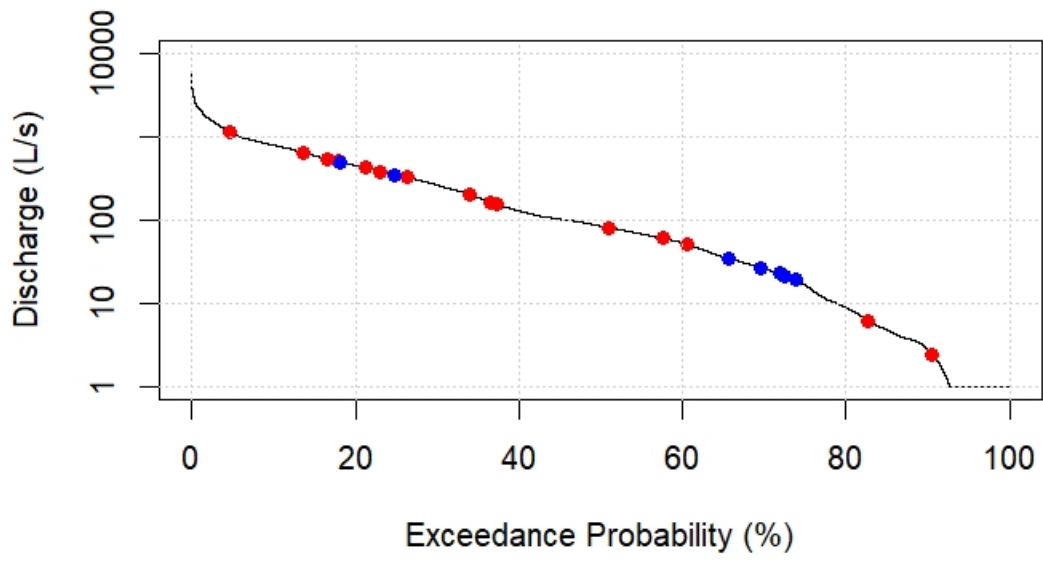

### MAYF

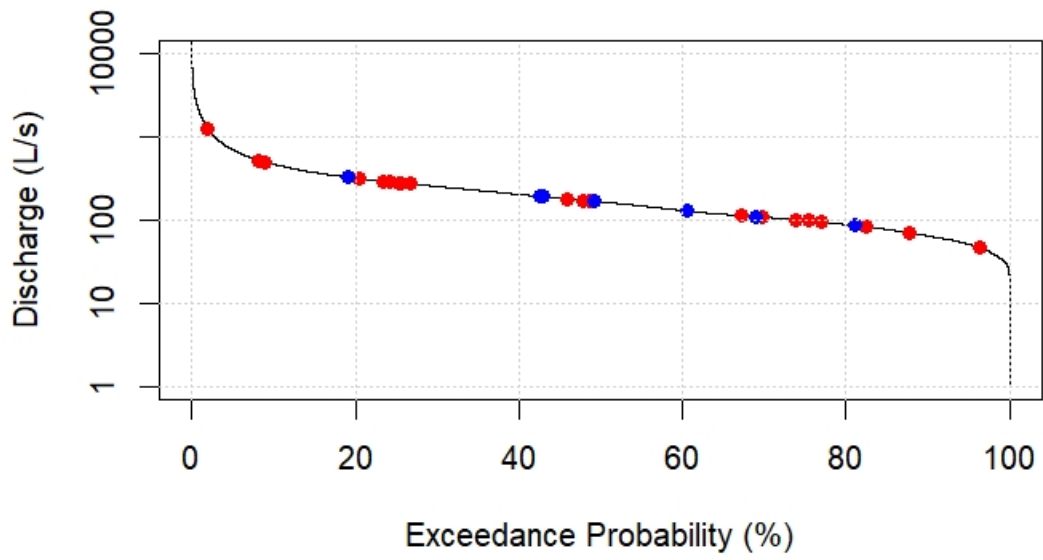

### MCDI

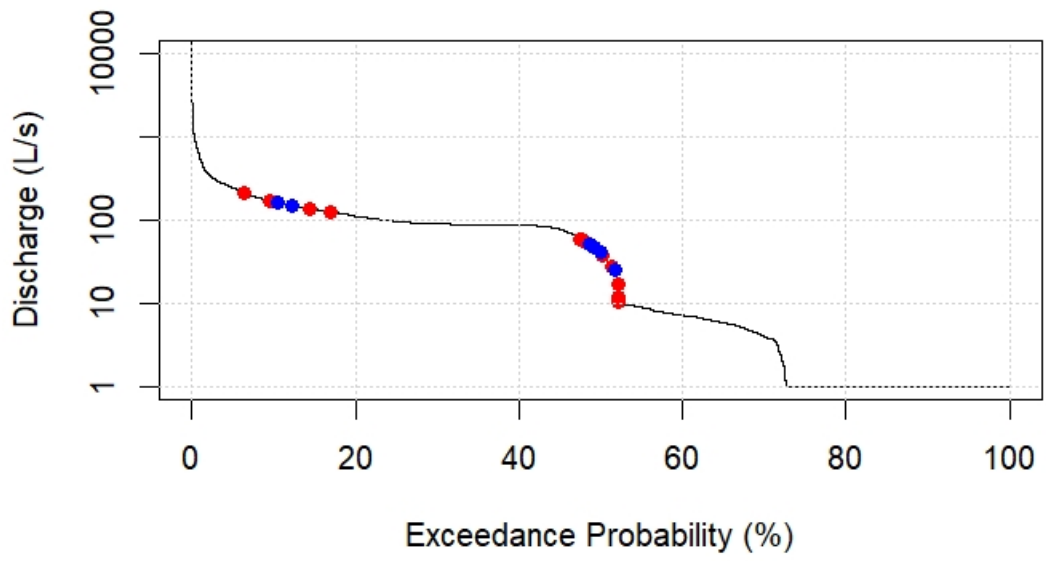

### MCRA

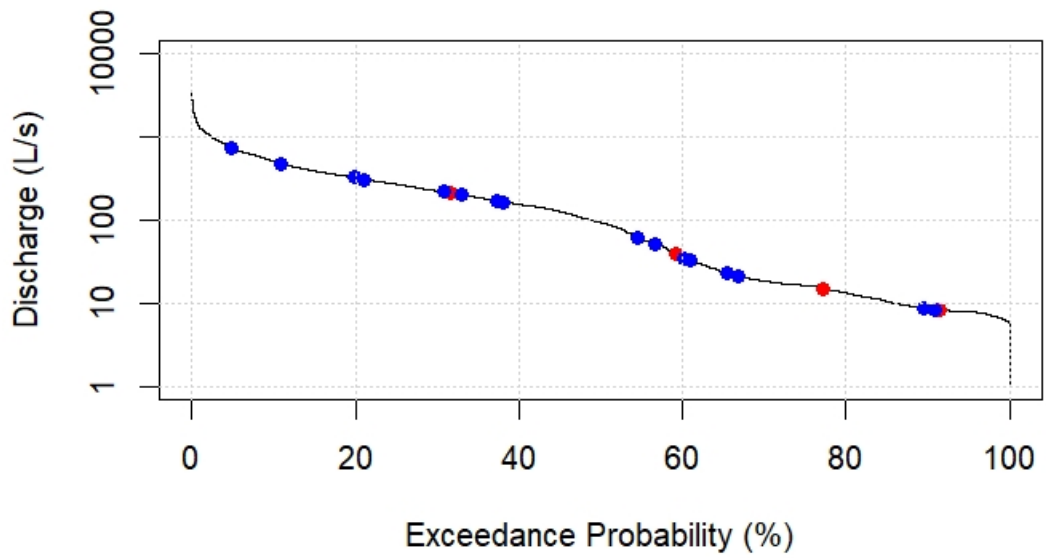

### OKSR

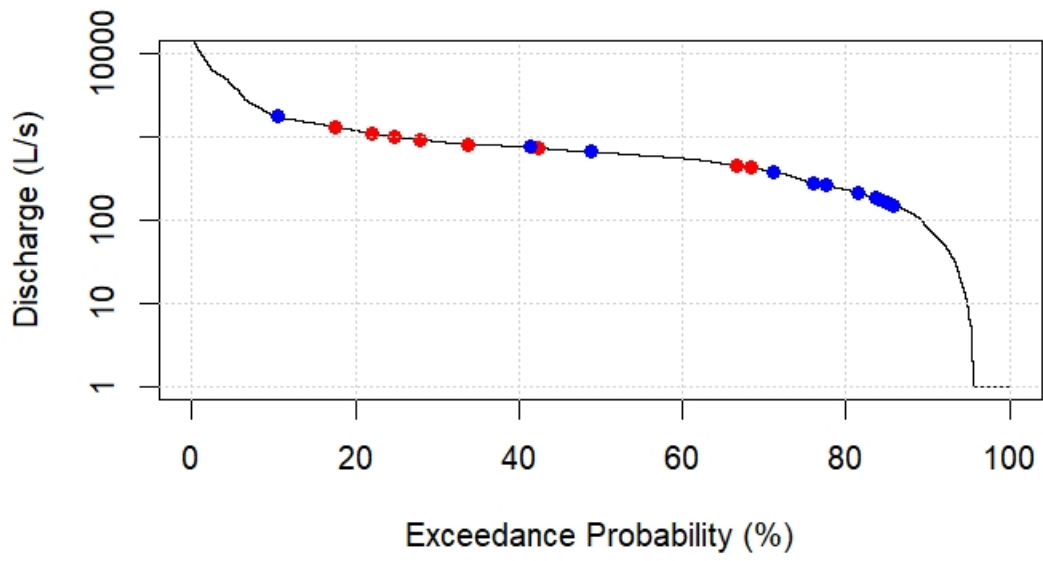

### POSE

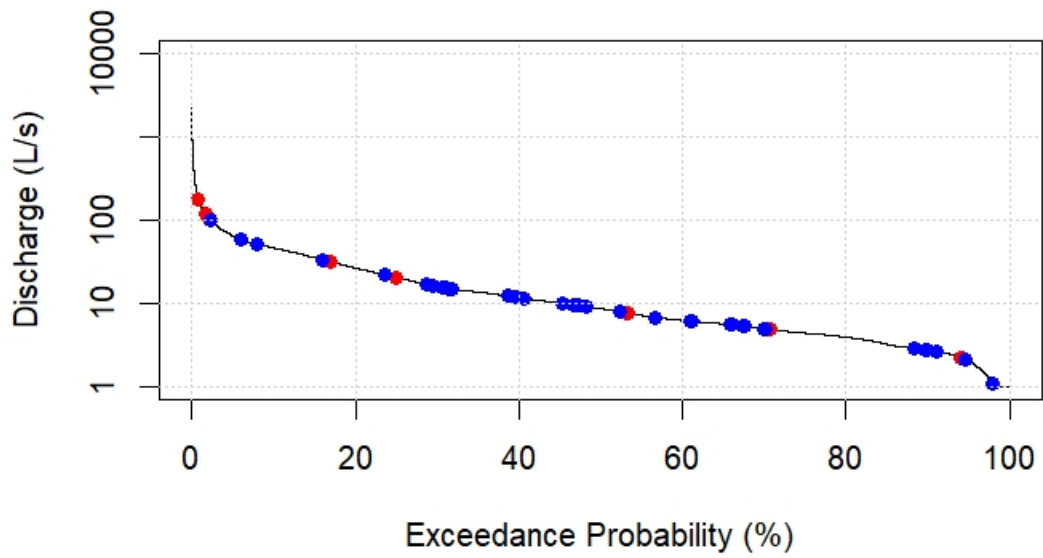



### PRIN

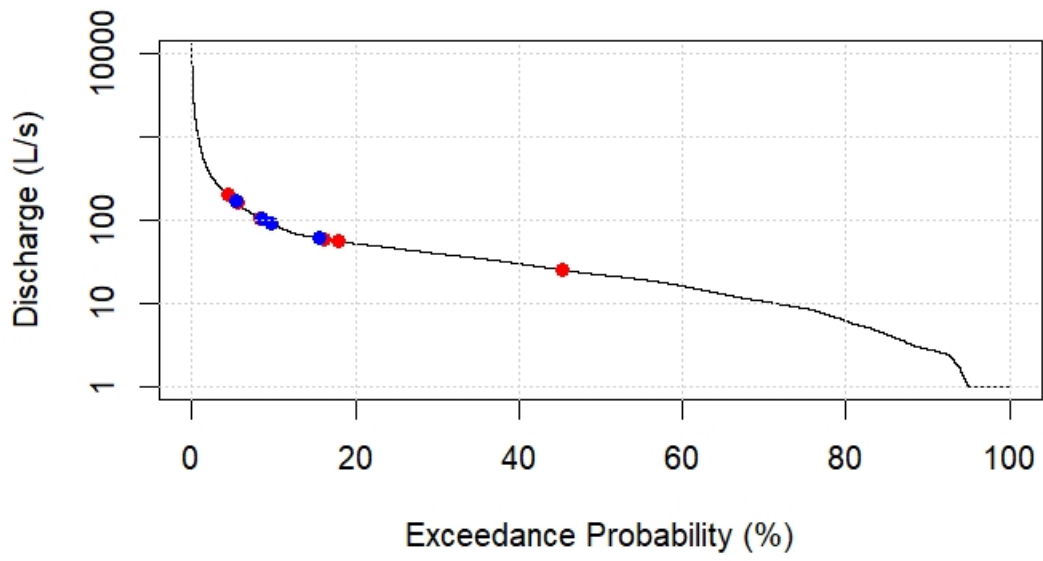

### REDB

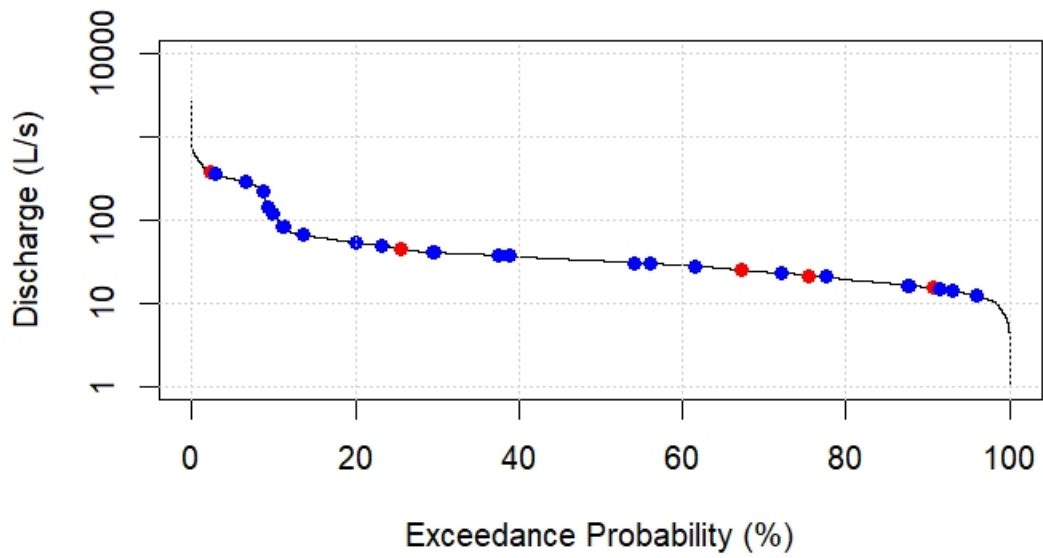

### SYCA

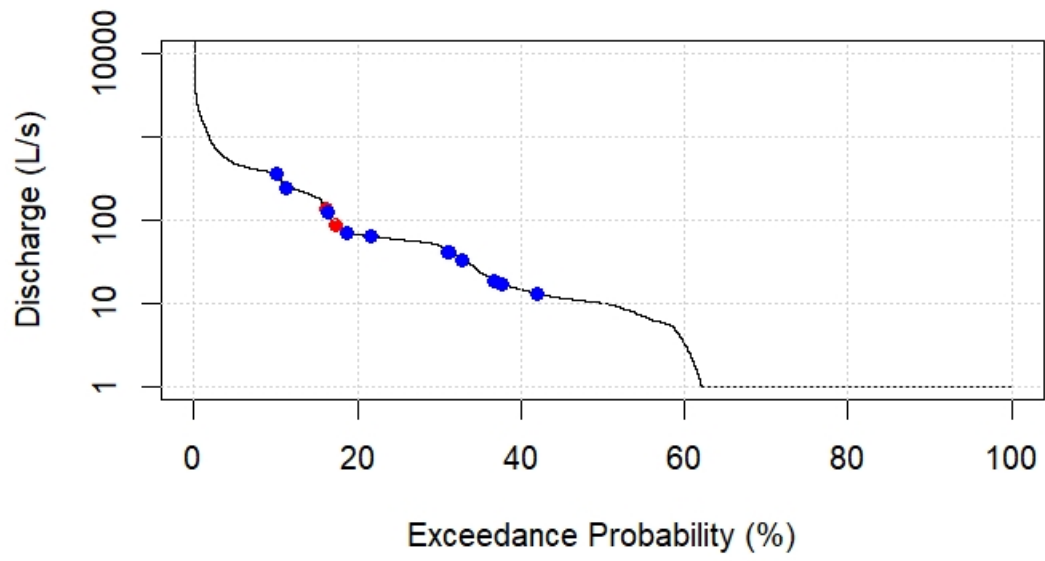

### TECR

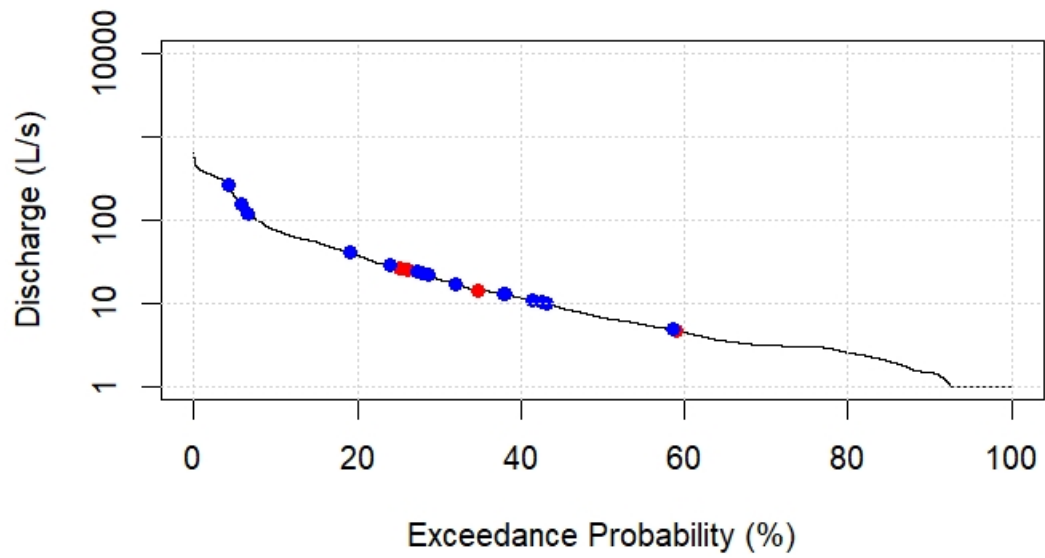

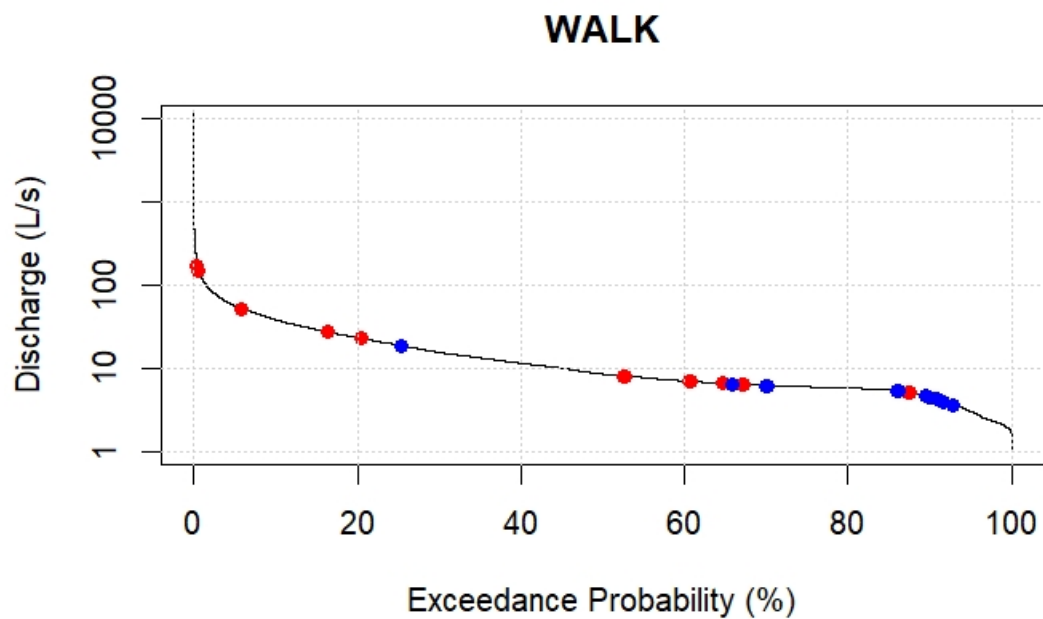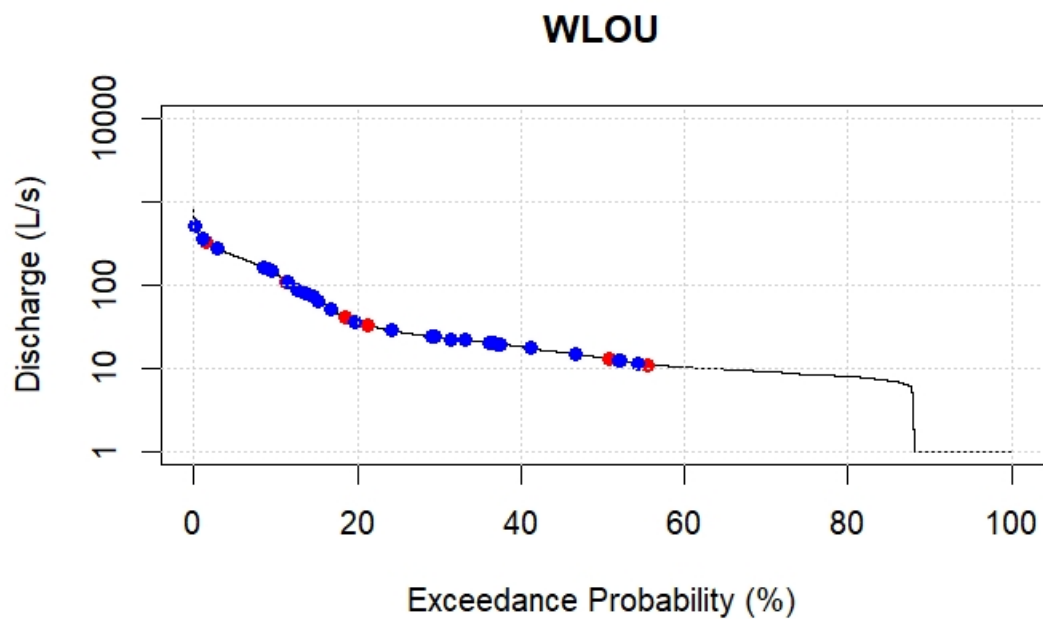

Figure S5. Flow duration curves for each site (derived from continuous discharge estimates) with points indicating the associated discharge of tracer-gas experiments that resulted in  $k_{600}$  and  $K_{600}$  estimates (blue) or salt-slug experiments that resulted in hydraulic geometry estimates (red). Discharge estimates less than  $1 \text{ L s}^{-1}$  (including when the stream is dry) have been set to  $1 \text{ L s}^{-1}$  for plotting purposes.
